# Supplementary material for: End-of-life care in cancer patients: how much drug therapy and how much palliative care? Record linkage study in Northern Italy
Source: PubMed Central journal article supplement — BMJ Open. 2022 May 6;12(5):e057437. doi: 10.1136/bmjopen-2021-057437 (PMC9083387; doi:10.1136/bmjopen-2021-057437), 2022-05-06
Supplement: bmjopen-2021-057437.draft_revisions.pdf [file bmjopen-2021-057437.draft_revisions.pdf]

# BMJ Open

BMJ Open is committed to open peer review. As part of this commitment we make the peer review history of every article we publish publicly available.

When an article is published we post the peer reviewers' comments and the authors' responses online. We also post the versions of the paper that were used during peer review. These are the versions that the peer review comments apply to.

The versions of the paper that follow are the versions that were submitted during the peer review process. They are not the versions of record or the final published versions. They should not be cited or distributed as the published version of this manuscript.

BMJ Open is an open access journal and the full, final, typeset and author-corrected version of record of the manuscript is available on our site with no access controls, subscription charges or pay-per-view fees (<http://bmjopen.bmj.com>).

If you have any questions on BMJ Open's open peer review process please email [info.bmjopen@bmj.com](mailto:info.bmjopen@bmj.com)

# BMJ Open

## End of life care in cancer patients: how much chemotherapy and how much palliative care? Record linkage study in Northern Italy

|                               |                                                                                                                                                                                                                                                                                                                                                                                                                                                                                                                                                       |
|-------------------------------|-------------------------------------------------------------------------------------------------------------------------------------------------------------------------------------------------------------------------------------------------------------------------------------------------------------------------------------------------------------------------------------------------------------------------------------------------------------------------------------------------------------------------------------------------------|
| Journal:                      | <i>BMJ Open</i>                                                                                                                                                                                                                                                                                                                                                                                                                                                                                                                                       |
| Manuscript ID                 | bmjopen-2021-057437                                                                                                                                                                                                                                                                                                                                                                                                                                                                                                                                   |
| Article Type:                 | Original research                                                                                                                                                                                                                                                                                                                                                                                                                                                                                                                                     |
| Date Submitted by the Author: | 17-Sep-2021                                                                                                                                                                                                                                                                                                                                                                                                                                                                                                                                           |
| Complete List of Authors:     | Formoso, Giulio; Reggio Emilia Local Agency - IRCCS Advanced Technologies and Care Models in Oncology, Clinical Governance Unit Marino, Massimiliano; Reggio Emilia Local Agency - IRCCS Advanced Technologies and Care Models in Oncology, Clinical Governance Unit Guberti, Monica; Reggio Emilia Local Agency - IRCCS Advanced Technologies and Care Models in Oncology, Department of Health Professions Grilli, Roberto Giuseppe; Reggio Emilia Local Agency - IRCCS Advanced Technologies and Care Models in Oncology, Clinical Governance Unit |
| Keywords:                     | CHEMOTHERAPY, ONCOLOGY, PALLIATIVE CARE                                                                                                                                                                                                                                                                                                                                                                                                                                                                                                               |
|                               |                                                                                                                                                                                                                                                                                                                                                                                                                                                                                                                                                       |

SCHOLARONE™  
Manuscripts

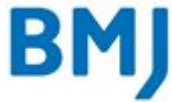

I, the Submitting Author has the right to grant and does grant on behalf of all authors of the Work (as defined in the below author licence), an exclusive licence and/or a non-exclusive licence for contributions from authors who are: i) UK Crown employees; ii) where BMJ has agreed a CC-BY licence shall apply, and/or iii) in accordance with the terms applicable for US Federal Government officers or employees acting as part of their official duties; on a worldwide, perpetual, irrevocable, royalty-free basis to BMJ Publishing Group Ltd ("BMJ") its licensees and where the relevant Journal is co-owned by BMJ to the co-owners of the Journal, to publish the Work in this journal and any other BMJ products and to exploit all rights, as set out in our [licence](#).

The Submitting Author accepts and understands that any supply made under these terms is made by BMJ to the Submitting Author unless you are acting as an employee on behalf of your employer or a postgraduate student of an affiliated institution which is paying any applicable article publishing charge ("APC") for Open Access articles. Where the Submitting Author wishes to make the Work available on an Open Access basis (and intends to pay the relevant APC), the terms of reuse of such Open Access shall be governed by a Creative Commons licence – details of these licences and which [Creative Commons](#) licence will apply to this Work are set out in our licence referred to above.

Other than as permitted in any relevant BMJ Author's Self Archiving Policies, I confirm this Work has not been accepted for publication elsewhere, is not being considered for publication elsewhere and does not duplicate material already published. I confirm all authors consent to publication of this Work and authorise the granting of this licence.

1  
2  
3 **End of life care in cancer patients: how much chemotherapy and how much palliative care? Record**  
4  
5 **linkage study in Northern Italy**  
6  
7

8 Giulio Formoso <sup>a</sup> ([giulio.formoso@ausl.re.it](mailto:giulio.formoso@ausl.re.it))  
9

10  
11 Massimiliano Marino <sup>a</sup> ([massimiliano.marino@ausl.re.it](mailto:massimiliano.marino@ausl.re.it))  
12

13  
14 Monica Guberti <sup>b</sup> ([monica.guberti@ausl.re.it](mailto:monica.guberti@ausl.re.it))  
15

16  
17 Roberto Giuseppe Grilli <sup>a</sup> ([robertogiuseppe.grilli@ausl.re.it](mailto:robertogiuseppe.grilli@ausl.re.it))  
18  
19  
20  
21  
22

23  
24 a. Reggio Emilia Local Agency - IRCCS Advanced Technologies and Care Models in Oncology, Clinical  
25 Governance Unit, Reggio Emilia, Emilia-Romagna, IT  
26  
27

28  
29 b. Reggio Emilia Local Agency - IRCCS Advanced Technologies and Care Models in Oncology (Italy),  
30 Department of Health Professions, Reggio Emilia, Emilia-Romagna, IT  
31  
32  
33  
34  
35  
36

37 **Corresponding author:** Giulio Formoso  
38

39 Via Amendola 2; 42122 Reggio Emilia (Italy)  
40

41  
42 E-mail: [giulio.formoso@ausl.re.it](mailto:giulio.formoso@ausl.re.it)  
43  
44  
45  
46  
47  
48  
49  
50  
51  
52  
53  
54  
55  
56  
57  
58  
59  
60

1  
2  
3 **Abstract** (word count: 298 words)  
4

5 **Objectives**  
6

7 Investigating use of chemotherapy and of palliative care services in the last month of life, and whether they  
8 are inversely associated.  
9

10  
11  
12 **Design**  
13

14 Population based cohort linked to mortality registry and administrative databases.  
15

16 **Setting**  
17

18 Emilia-Romagna Region (Northern Italy – 4,4 million residents).  
19

20  
21 **Participants**  
22

23 55,625 residents who died of cancer between 2017 and 2020.  
24

25 **Primary and secondary outcome measures**  
26

27 Multivariate analyses were carried out to assess the relationship between chemotherapy and palliative care  
28 services, and their association with factors related to tumour severity.  
29

30  
31  
32 **Results**  
33

34 15.3% of study population received chemotherapy and 40.2% received palliative care services in the last  
35 month of life, with variation across eight local health authorities (LHA). The likelihood to receive  
36 chemotherapy or palliative care services may have depended on LHA of residence. Chemotherapy was  
37 inversely associated to receiving home care or hospice services during the last 30 days, surgery within the  
38 last 30 days, aggressive tumours and increasing age, whereas they increased in case of haematologic tumours  
39 and previous hospital admissions. The likelihood to receive palliative care went in the opposite direction in  
40 case of haematologic tumours and hospital admissions within the last 30 days and in presence of aggressive  
41 tumours whereas surgery within the last 30 days, receiving chemotherapy during the last 30 days and  
42 increasing age were inversely associated to it.  
43  
44  
45  
46  
47  
48  
49  
50  
51  
52  
53

54  
55  
56 **Conclusion**  
57  
58  
59  
60

1  
2  
3 Use of chemotherapy and palliative care in the last month of life appear to be inversely associated, with  
4 relatively high variability across different LHAs that may be explained to a higher degree by different  
5 prescribing attitudes rather than by local epidemiology/case mix or availability of services. While  
6 administrative data have obvious limits, our findings are in line with conclusions of other studies. Shifting  
7 resources from aggressive pharmacological treatments to comprehensive approaches to palliative care  
8 services is ideally a priority in cancer care.  
9  
10  
11  
12  
13  
14  
15  
16  
17  
18  
19  
20  
21  
22  
23  
24  
25  
26  
27  
28  
29  
30  
31  
32  
33  
34  
35  
36  
37  
38  
39  
40  
41  
42  
43  
44  
45  
46  
47  
48  
49  
50  
51  
52  
53  
54  
55  
56  
57  
58  
59  
60

1  
2  
3  
4  
5  
6  
7  
8  
9  
10  
11  
12  
13  
14  
15  
16  
17  
18  
19  
20  
21  
22  
23  
24  
25  
26  
27  
28  
29  
30  
31  
32  
33  
34  
35  
36  
37  
38  
39  
40  
41  
42  
43  
44  
45  
46  
47  
48  
49  
50  
51  
52  
53  
54  
55  
56  
57  
58  
59  
60

### **Article summary: strengths and limitations of this study**

- Inclusion of all people deceased from cancer in a Region with 4,4 million residents, linking information on use of chemotherapy and palliative care services with tumour characteristics and severity, are major strengths of this study.
- Results are discussed in-depth in light of scientific literature on multidisciplinary approaches to favour end of life transitions from aggressive treatments to palliative care
- Our data should be taken with caution since administrative data could not capture all the elements that may contribute to clinical decision making
- Moreover, although multivariate analyses provide adjustment for factors associated with tumour severity, residual confounding can be present

### **Keywords:**

- End of life care
- Chemotherapy
- Palliative care
- Cancer

1  
2  
3 TEXT (word count: 3068 words, excluding tables, figures and references)  
4  
5  
6

## 7 **Introduction**

8  
9 The appropriate use of chemotherapy in the end-of-life care is increasingly debated, both for clinical and  
10 economic reasons. [1,2] Aggressive treatments, facilitated by the availability of newer anticancer agents  
11 that have fewer side effects, [3] often do not alleviate patients' suffering or provide hope for extending  
12 significantly life of decent quality. Focus on clinically irrelevant treatments may lead to the underuse of  
13 palliative care, [4,5,6] defined by WHO as "an approach that improves the quality of life of patients and  
14 their families facing the problem associated with life-threatening illness, through ... assessment and  
15 treatment of pain and other problems, physical, psychosocial and spiritual". [7] Palliative care is generally  
16 provided in dedicated hospices or as home care services by a specially trained team of doctors, nurses and  
17 other specialists who work together with a patient's other doctors to provide an extra layer of support.  
18 Expectations of patients' and parents on one side, [8,9,10] and difficulties in predicting and communicating  
19 patients' prognosis on the other, [11,12] are among the main determinants of the chemotherapy overuse.  
20 Some patients may perceive continued active treatment as the only acceptable option. [10] For example, in  
21 a prospective cohort of terminally ill patients with cancer (n = 386), 31% preferred life-extending care rather  
22 than comfort care and as many as 77% preferred to receive chemotherapy even if it would extend their life  
23 by only one week. [12] Communication between the care team, patient and family seem to be a central  
24 element that can influence this phenomenon. [13] A qualitative study in the US identified three distinct  
25 patterns, from the caregiver's point of view of patient-caregiver-physician communication, that can influence  
26 the transition from disease-oriented to comfort-oriented care: [14] the first two patterns involve explicit  
27 discussions about EOL care and treatment choices, either with or without a shared understanding about  
28 prognosis, therefore favoring (or not) seamless transitions from active cancer treatment to comfort-oriented  
29 care, usually in hospice; in the third one no such explicit discussion on EOL occur, often leading to an  
30 unanticipated decline of the patient's condition, discontinuation of chemotherapy only when the patient  
31 become too sick and a sense of abandonment by and anger at the oncology team.  
32  
33  
34  
35  
36  
37  
38  
39  
40  
41  
42  
43  
44  
45  
46  
47  
48  
49  
50  
51  
52  
53  
54  
55  
56  
57  
58  
59  
60



1  
2  
3 From the clinicians' point of view, withdrawal of drugs during the final, but not exactly predictable, stages  
4 of life is challenging [15]: early withdrawal can cause potential harm, whereas late withdrawal would  
5  
6 involve unnecessary treatment and stress. Research findings suggest that culture may impact the utilization  
7  
8 of aggressive treatment in patients with advanced cancer. For example, a study from Japan stated that only  
9  
10 3.7% of patients receive chemotherapy in their last 2 weeks of life [16]  
11  
12

13  
14 However, chemotherapy itself is frequently considered a form of palliative care, aimed at reducing tumour-  
15  
16 related symptoms, so that boundaries between curative and palliative intent of chemotherapy are  
17  
18 sometimes difficult to establish. [17,18,19] According to the American Society of Clinical Oncology (ASCO),  
19  
20 chemotherapy can potentially improve QOL in late stages of life even if it doesn't impact survival length  
21  
22 [20]. In this regard, it promotes a simultaneous care approach, using palliative care alongside usual  
23  
24 oncology care as the standard of care for any patient with advanced cancer. [21]  
25  
26

27  
28 Several studies have analysed use of chemotherapy in the last weeks of life with results that, although  
29  
30 variable, show a tendency to prolong treatment beyond realistic expectations of a favourable benefit-risk  
31  
32 ratio.[18,22,23,24,25,26,27] Analysis of data available in administrative and clinical databases can inform  
33  
34 about prescribing patterns and the utilization of health care services in the end of life, in order to provide  
35  
36 useful basis for discussion helping clinicians and health care managers identify areas of improvement,  
37  
38 enhance the appropriateness and value of cancer care and make judicious use of available resources. In  
39  
40 keeping with these targets, this study aims at providing insights on the use of chemotherapy, hospital,  
41  
42 hospice and home care services in the last month of life in a region of Northern Italy with more than 4  
43  
44 million residents, also to assess whether palliative care services are inversely associated with overuse of  
45  
46 chemotherapy.  
47  
48  
49  
50  
51

## 52 **Methods**

53  
54 A cohort of residents in the Emilia-Romagna Region dying of cancer between 2017 and 2020 (ICD-X  
55  
56 classification: *C00-C97, D00-D09, D37-D48*) were selected from the regional mortality registry. This cohort  
57  
58 was linked with the routinely available administrative databases, which include hospital discharge,  
59  
60

1  
2  
3 pharmacological prescriptions at discharge or outpatient (use of drugs within ATC classes L01 and L02),  
4  
5 ambulatory services, hospice and domiciliary care (also collectively considered as palliative care services),  
6  
7 received within the last 30 days of life. Data were anonymized and record linkage procedures were  
8  
9 performed according to the unique identification number, assigned to each resident.  
10  
11 Analyses were specifically aimed at describing frequency of chemotherapy, palliative care services or both  
12  
13 received within the last 30 days of life among eight Local Health Authorities (LHA). Logistic multivariate  
14  
15 two-level analyses [28] were carried out to assess whether 1) chemotherapy use, 2) palliative care services  
16  
17 3) or both within the last 30 days of life could be associated to each other as well as to type of tumour  
18  
19 (solid vs haematological), patients' age, surgery and hospital admissions, considering LHA clustering as the  
20  
21 second level (random intercept) to eliminate the effect of a possible correlation of results of residents in  
22  
23 the same province. One-level models, [29] adding each LHA as covariates (each compared to a reference  
24  
25 LHA) were subsequently used to assess whether use of chemotherapy and of palliative care could present  
26  
27 variability among LHA. Odds ratio with 95% confidence intervals were calculated. SAS version 8.2 (SAS  
28  
29 Institute inc., Cary, NC, USA) and STATA/SE version 16.1 (STATA Corp, College Station, TX 77845) were used  
30  
31 for statistical analyses.  
32  
33  
34  
35

36 *Patient and Public Involvement:* no patient involved.  
37  
38  
39  
40  
41

## 42 **Results**

43  
44

45 Between January 1, 2017 and December 31, 2020 in Emilia-Romagna, 55,625 people died from cancer.  
46  
47 Table 1 quantifies the main cancer diagnosis associated to death, by LHA; no substantial differences are  
48  
49 shown among different LHA. Table 2 shows use of chemotherapy and of palliative care services within the  
50  
51 last 30 days of life by main cancer diagnosis in the whole cohort. Breast, prostate and haematologic  
52  
53 tumours are those where use of chemotherapy is highest (in more than 20% of patients), whereas nervous  
54  
55 system and urinary tumours are those with the lowest use (in less than 10%). Use of palliative care services  
56  
57 appears relatively uniform across tumour types, except for a lower observed use in genital tumours in men  
58  
59 and haematologic tumours. Overall, 15.3% of patients received chemotherapy within the last 30 of life,  
60

1  
2  
3 with an increasing trend from 2017 to 2020 (respectively 14.6, 15.0, 15.7 and 16.2). About palliative care  
4 services, 40.2% (39.7, 40.3, 40.1 and 40.8 from 2017 to 2020) of patients received them. 4.1% received  
5 surgery within the last 30 days.  
6  
7

8  
9 Among the eight local health authorities, there was variability in the use of chemotherapy (from 12.5% to  
10 16.9% - Fig.1) and of palliative care (from 36.2% to 43.7% - Fig.2) in the last 30 days of life. 39.1% of  
11 patients died in hospital, with wide variability among the LHAs (range: from 29.4% to 44.0%).  
12  
13

14  
15 A multivariate two-level model with random intercept (LHA) shows that the likelihood to receive  
16 chemotherapies, during the last 30 days of life, increased by 115% in case of haematologic tumours and of  
17 63% in case of hospital admissions within the last 30 days, whereas it was reduced of 41% for surgery  
18 within the last 30 days, of 12% for aggressive tumours, of 8% for receiving home care or hospice services  
19 during the last 30 days and of 5% for every year of increasing age (table 3a). Intraclass correlation  
20 coefficient (ICC) (0.3%) shows low intra-LHA correlation.  
21  
22

23  
24 A second two-level cluster multivariate model shows that the likelihood to receive palliative care during the  
25 last 30 days of life goes in the opposite direction, decreasing of 48% in case of haematologic tumours and of  
26 30% for hospital admissions within the last 30 days, and increasing of 12% in presence of aggressive  
27 tumours, whereas it decreased of 56% in case of surgery within the last 30 days, of 10% if receiving  
28 chemotherapies during the last 30 days and of 5% for every year of increasing age (table 3a). Also in this  
29 case the intraclass correlation coefficient (0.3%) shows no intra LHA correlation.  
30  
31

32  
33 A third two-level cluster multivariate model shows that aggressive tumours reduce of 16% the likelihood to  
34 receive concurrent chemotherapy and palliative care during the last 30 days of life, in keeping with the  
35 result of the first model, suggesting that clinicians in such cases tend not to insist on chemotherapies (table  
36 3a). Also in this case the intraclass correlation coefficient (0.4%) shows no intra-LHA correlation.  
37  
38

39  
40 Since no effect of clustering of subjects in the 8 LHAs was shown, in order to assess variability among LHA  
41 we replicated the latter models without LHA clustering and including LHA as covariates (table 3b). Covariate  
42 coefficients are the same as in the cluster models, confirming no effect of LHA clustering on the outcome.  
43  
44  
45  
46  
47  
48  
49  
50  
51  
52  
53  
54  
55  
56  
57  
58  
59  
60

1  
2  
3 As raw data suggested in fig. 1 and fig. 2, place of residence may also be associated with the likelihood to  
4 receive end-of-life chemotherapies and palliative care after adjusting for the other covariates.  
5  
6  
7  
8  
9

## 10 11 **Discussion**

12  
13  
14 This study shows that use of chemotherapy and of palliative care services in the last month of life are  
15 inversely associated rather than complementary, suggesting the need to further explore the hypothesis  
16 that palliative care services may have a role in preventing inappropriate use of chemotherapy. A variable  
17 use of chemotherapy and palliative care services in different LHAs and across different tumours in the last  
18 month of life is also shown. Compared to solid cancers, haematologic tumours tend to be treated more  
19 frequently with chemotherapy and to be provided less frequently with palliative care, probably in light of  
20 the more frequent availability of effective in-hospital therapies leading to longer survival [30] or of  
21 perceiving a more favourable benefit-risk ratio of “not giving up”, and of the often rapid pace of decline  
22 near death. This has also been observed in other studies. [31,32,33,34] An opposite pattern is associated to  
23 aggressive tumours, treated more frequently with palliative care and less with chemotherapy.  
24  
25  
26  
27  
28  
29  
30  
31  
32  
33  
34  
35

36  
37 Variability among different LHAs may depend either on a different epidemiological distribution of the  
38 tumours and of their severity, or on different prescribing attitudes and availability of palliative services in  
39 the areas of residence. Main cancer diagnosis associated to death appear similar across different LHA. In  
40 addition, multivariate analyses provide adjustment for factors associated with tumour severity (age,  
41 haematologic tumour, previous surgery and hospital admission) and, although residual confounding can be  
42 reasonably present, we consider unlikely that it could provide the main explanation for the observed  
43 variability. Therefore, despite limits in our data and taking unobserved factors (residual confounding) into  
44 account, we consider that this variability may be explained to a higher degree by different prescribing-  
45 management attitudes rather than by local epidemiology/case mix. As for the availability of palliative  
46 services in the areas of residence, the Emilia-Romagna Region has been quite active in implementing a  
47 national law issued in 2010 [35] to guarantee such availability as well as adequate access to these services.  
48  
49  
50  
51  
52  
53  
54  
55  
56  
57  
58  
59  
60

1  
2  
3  
4  
5  
6  
7  
8  
9  
10  
11  
12  
13  
14  
15  
16  
17  
18  
19  
20  
21  
22  
23  
24  
25  
26  
27  
28  
29  
30  
31  
32  
33  
34  
35  
36  
37  
38  
39  
40  
41  
42  
43  
44  
45  
46  
47  
48  
49  
50  
51  
52  
53  
54  
55  
56  
57  
58  
59  
60

[36] Further qualitative research could analyse whether attitudes and level of endorsement in different LHA may in part explain their differential use/access, aside from their availability which is relatively homogeneous across the region.

Our data should be taken with caution since administrative data are grossly descriptive and have obvious limits in capturing all the elements that may contribute to clinical decision making. Nonetheless, our findings are in line with conclusions of several other studies. There may be a potential to limit use of end of life chemotherapies increasing at the same time the provision of palliative care services. In general, shifting resources from aggressive pharmacological treatments to comprehensive approaches to palliative care services should be a priority in cancer care, and palliative care may be one of the determinants “protecting” against the overuse of chemotherapy. While the high variability observed among Local Health Authorities in the use of these services is worrying, it also suggests that a huge potential exists to better organize end of life care for cancer patients.

Clinical and administrative data can help to promote discussion among oncologists, specialists in palliative care, general practitioners, pharmacists, health care managers and (ideally) patients' representatives to maximize quality of end of life care, especially in blood malignancies, in light of available resources. Local multidisciplinary groups can/should use data to analyse possible determinants of inappropriate care, discuss to what extent chemotherapies can be used as palliative care and propose strategies to offer patients and their families the best possible support. This especially in light of the increasing availability and accelerated approval of new therapies [37] often with a limited added value but with a wide range of indications, targeting resistant cases and/or administered by oral route. These circumstances may favour an increase in the use of chemotherapies sometimes (or often) without a real clinical benefit, and may hinder or delay access to palliative care services.

The availability of adequate prognostic tools is key to discuss appropriateness of end-of-life care and, in theory, performance status can be used as such to guide clinicians and palliative care specialists to make choices for appropriate health care.[38] Aside from ECOG performance status, that may be variably weighed by physicians often leading to optimistic assessments, [39] other prognostic tools should be

1  
2  
3 warranted. In 2005, the European Association for Palliative Care made recommendations in this regard [40]  
4  
5 and prognostic tools have been developed and validated.[41] Yet, most of them depend on the evaluation  
6  
7 of functional status, which is largely subjective and may lead to optimistic estimates to justify the use of  
8  
9 aggressive therapies. Objective assessment of functional status have been advocated, for example the  
10  
11 measurement of a surrogate like skeletal muscle mass through imaging techniques. [31] A palliative  
12  
13 prognostic score integrating subjective judgments with a series of more objective parameters has been  
14  
15 validated and extensively discussed, showing a good balance between accuracy and applicability in clinical  
16  
17 practice. [42,43,44,45] Routine use of this kind of prognostic tools would certainly require adequate  
18  
19 promotion among clinicians. Again, the objective should be to warrant the most appropriate care given the  
20  
21 patients' clinical status, avoiding overtreatments that could worsen their quality of life diverting attention  
22  
23 from "truly palliative" care.

24  
25  
26  
27 However, to fulfil this goal, the use of more accurate prognostic assessments does not seem sufficient.  
28  
29 Physicians should be prepared to address patients' and relatives' concerns and expectations by refining  
30  
31 their communication skills in specific kinds of situations like communication at diagnosis, discussion of  
32  
33 prognosis, decision-making about palliative anticancer therapy, transitions to palliative care and  
34  
35 preparation of patients and families for dying and death, more widespread use of advanced care planning  
36  
37 (ACP) [46] ACP enables individuals "to define goals and preferences for future medical treatment and care,  
38  
39 to discuss these goals and preferences with family and healthcare providers, and to record and review  
40  
41 these preferences if appropriate". ACP interventions have the potential to prepare patients for decision-  
42  
43 making when they are unable to make their own decisions, typically including one or more focused,  
44  
45 personal conversations between patients and healthcare professionals about patients' personal values, life  
46  
47 goals, and preferences regarding future medical treatment and care. [47]. Interventions that include  
48  
49 communication about ACP and care preferences have been found to improve concordance between care  
50  
51 preferences and actual care delivered. [48]

52  
53  
54  
55  
56 To better align care with preferences, the National Academy Medicine and American Society of Clinical  
57  
58 Oncology recommend patients and providers have goals-of-care (GOC) conversations [49] all of which may  
59  
60

1  
2  
3 occur in ACP [50] and that palliative care, which typically involves such discussions, [51] be integrated into  
4  
5 standard oncology care. [52]

6  
7 Although the capacity for it is inborn, even empathy is considered a learned behaviour.[53] Lack of  
8  
9 communication skills is one of the main barriers to adequate communication and decision-making, but  
10  
11 physicians' misconception that skills training is not needed, that "you have to be born with this skill" and  
12  
13 about the efficacy of training may hinder specific efforts to fill that gap. [54] Doctors' attitudes towards  
14  
15 death, their focus on clinical parameters and their lack of confidence in their own judgment of their  
16  
17 patient's true condition may also play a negative role. [55]

18  
19 Nurses play a pivotal role as well in accompanying patients and their families through their cancer journey.  
20  
21 Nursing practice covers a broad continuum of care, from health promotion to disease prevention,  
22  
23 coordination of care, cure (when possible) and palliative care when cure is not possible [49]. Given the  
24  
25 frequency and continuity of contact that nurses have with patients and their families, they are in an ideal  
26  
27 position to assume an important role in health care delivery processes, [56, 57] to provide cancer patients  
28  
29 and their families with emotional and social support, together with adequate communication about the  
30  
31 diagnosis, prognosis and treatment alternatives [56, 58]. Cancer care is multidisciplinary, requiring effective  
32  
33 communication also within the team and the importance of recognizing being part of a team. In this regard,  
34  
35 it is essential to propose shared training between the entire care team and to develop organizational  
36  
37 models and work tools to fulfil this goal. [56, 59]

38  
39 Promotion of enhanced health professional-patient communication and shared decision making can be  
40  
41 effectively achieved [60] but would benefit from a system-wide approach considering several elements like  
42  
43 inclusion of communication skills in clinical competencies needed for credentialing, incentives to provide  
44  
45 and to seek effective training, system capacity to record communication with patients in electronic medical  
46  
47 records and multi-focal and interdisciplinary team support for serious illness communication.[39,61]  
48  
49  
50  
51  
52  
53  
54  
55  
56

## 57 **Conclusion**

58  
59  
60

1  
2  
3 A multidisciplinary approach involving clinicians, nurses, specialists in palliative care, pharmacists, health  
4 care managers and members of the public is needed to investigate macro issues highlighted through  
5  
6 care managers and members of the public is needed to investigate macro issues highlighted through  
7  
8 administrative data, to promote the use of better prognostic tools and a more comprehensive approach to  
9  
10 end-of-life cancer care, limiting use of aggressive treatments that are not beneficial or that could even  
11  
12 worsen quality of life. We are implementing this approach in our Local Health Authority. However, we  
13  
14 advocate that such local efforts should be nested within a system-wide approach to promote effective  
15  
16 physician-patient communication, thoroughly integrating communication skills among the clinical  
17  
18 competencies doctors need to achieve. These are especially needed in end-of-life care.  
19  
20  
21  
22  
23  
24  
25  
26  
27  
28  
29  
30  
31  
32  
33  
34  
35  
36  
37  
38  
39  
40  
41  
42  
43  
44  
45  
46  
47  
48  
49  
50  
51  
52  
53  
54  
55  
56  
57  
58  
59  
60



Table 1 – Study population of patients dying for cancer in Emilia-Romagna between 2017 and 2020, by tumour site and local health authority: number (white background) and percentage (grey background)

|                  | LHA1  | LHA2  | LHA3  | LHA4  | LHA5   | LHA6  | LHA7  | LHA8   | Region |
|------------------|-------|-------|-------|-------|--------|-------|-------|--------|--------|
| Head & neck      | 105   | 137   | 157   | 221   | 296    | 43    | 164   | 316    | 1,439  |
|                  | 2.6   | 2.5   | 2.7   | 2.7   | 2.6    | 2.7   | 3.1   | 2.3    | 2.6    |
| Digestive        | 1,422 | 1,803 | 1,825 | 2,571 | 3,507  | 504   | 1,638 | 4,305  | 17,575 |
|                  | 35.3  | 33.2  | 31.4  | 31.9  | 30.4   | 31.5  | 30.6  | 31.2   | 31.6   |
| Respiratory      | 778   | 857   | 1,084 | 1,501 | 1,993  | 279   | 957   | 2,649  | 10,098 |
|                  | 19.3  | 15.8  | 18.7  | 18.6  | 17.3   | 17.5  | 17.9  | 19.2   | 18.2   |
| Musculoskeletal  | 31    | 51    | 52    | 62    | 63     | 18    | 30    | 102    | 409    |
|                  | 0.8   | 0.9   | 0.9   | 0.8   | 0.6    | 1.1   | 0.6   | 0.7    | 0.7    |
| Skin             | 122   | 129   | 193   | 171   | 319    | 68    | 110   | 360    | 1,472  |
|                  | 3.0   | 2.4   | 3.3   | 2.1   | 2.8    | 4.3   | 2.1   | 2.6    | 2.7    |
| Nervous system   | 109   | 181   | 187   | 302   | 387    | 57    | 163   | 506    | 1,892  |
|                  | 2.7   | 3.3   | 3.2   | 3.7   | 3.4    | 3.6   | 3.0   | 3.7    | 3.4    |
| Breast           | 278   | 355   | 370   | 517   | 789    | 102   | 382   | 790    | 3,583  |
|                  | 6.9   | 6.5   | 6.4   | 6.4   | 6.8    | 6.4   | 7.1   | 5.7    | 6.4    |
| Genital (women)  | 196   | 243   | 262   | 385   | 598    | 74    | 204   | 586    | 2,548  |
|                  | 4.9   | 4.5   | 4.5   | 4.8   | 5.2    | 4.6   | 3.8   | 4.2    | 4.6    |
| Genital (men)    | 9     | 21    | 14    | 32    | 50     | 6     | 29    | 54     | 215    |
|                  | 0.2   | 0.4   | 0.2   | 0.4   | 0.4    | 0.4   | 0.5   | 0.4    | 0.4    |
| Urinary          | 247   | 397   | 389   | 566   | 918    | 103   | 461   | 962    | 4,043  |
|                  | 6.1   | 7.3   | 6.7   | 7.0   | 8.0    | 6.5   | 8.6   | 7.0    | 7.3    |
| Prostate         | 181   | 237   | 275   | 323   | 486    | 56    | 204   | 491    | 2,253  |
|                  | 4.5   | 4.4   | 4.7   | 4.0   | 4.2    | 3.5   | 3.8   | 3.6    | 4.1    |
| Haematologic     | 359   | 607   | 563   | 870   | 1,241  | 188   | 546   | 1500   | 5,874  |
|                  | 8.9   | 11.2  | 9.7   | 10.8  | 10.8   | 11.8  | 10.2  | 10.9   | 10.6   |
| Other/metastatic | 191   | 406   | 440   | 547   | 883    | 100   | 469   | 1,188  | 4,224  |
|                  | 4.7   | 7.5   | 7.6   | 6.8   | 7.7    | 6.3   | 8.8   | 8.6    | 7.6    |
| Region           | 4,028 | 5,424 | 5,811 | 8,068 | 11,530 | 1,598 | 5,357 | 13,809 | 55,625 |
|                  | 100.0 | 100.0 | 100.0 | 100.0 | 100.0  | 100.0 | 100.0 | 100.0  | 100.0  |

Table 2 - Percentage of use of chemotherapy and palliative care (home or hospice care) during the last 30 days of life

| <i>Cancer type</i> | <b>Treatment during the last 30 day of life</b> |                    |                       |                             |
|--------------------|-------------------------------------------------|--------------------|-----------------------|-----------------------------|
|                    | <b>% chemotherapy</b>                           | <b>% home care</b> | <b>% hospice care</b> | <b>% overall palliative</b> |
| Head & neck        | 13.0                                            | 19.3               | 28.7                  | 41.3                        |
| Digestive          | 10.3                                            | 23.1               | 27.7                  | 44.8                        |
| Respiratory        | 19.3                                            | 21.5               | 28.0                  | 43.3                        |
| Musculoskeletal    | 10.4                                            | 20.5               | 21.8                  | 38.1                        |
| Skin               | 16.5                                            | 25.1               | 30.9                  | 47.8                        |
| Nervous system     | 6.1                                             | 20.3               | 31.9                  | 45.2                        |
| Breast             | 27.1                                            | 20.8               | 25.5                  | 40.4                        |
| Genital (women)    | 16.4                                            | 20.8               | 29.6                  | 44.6                        |
| Genital (men)      | 13.0                                            | 15.8               | 11.2                  | 24.2                        |
| Urinary            | 8.7                                             | 19.2               | 22.9                  | 37.4                        |
| Prostate           | 26.1                                            | 18.4               | 23.2                  | 37.1                        |
| Haematologic       | 24.7                                            | 15.3               | 13.2                  | 26.2                        |
| Other/metastatic   | 8.4                                             | 18.2               | 15.8                  | 30.8                        |
| <b>Region</b>      | <b>15.3</b>                                     | <b>20.7</b>        | <b>24.9</b>           | <b>40.2</b>                 |

Table 3a - Factors associated with receiving chemotherapy, palliative care or both during the last 30 days in Emilia-Romagna (random intercept two-level multivariate model considering LHA clustering)

| Factor                                               | Chemotherapy      | Palliative care   | Chemotherapy<br>palliative care |
|------------------------------------------------------|-------------------|-------------------|---------------------------------|
|                                                      | OR (CI 95%)       | OR (CI 95%)       | OR (CI 95%)                     |
| Chemotherapy within the last 30 days                 | -                 | 0.90* (0.85-0.94) | -                               |
| Palliative care within the last 30 days              | 0.92* (0.87-0.97) | -                 | -                               |
| Haematologic tumour ( <i>ref. solid/metastatic</i> ) | 2.15* (2.00-2.30) | 0.52* (0.49-0.56) | 1.03 (0.92-1.16)                |
| Age (continuous, in year)                            | 0.95* (0.95-0.95) | 0.99* (0.99-0.99) | 0.96*(0.96-0.96)                |
| Hospital admission within the last 30 days           | 1.63* (1.55-1.72) | 0.70* (0.67-0.72) | 1.05 (0.98-1.14)                |
| Surgery within the last 30 days                      | 0.59* (0.52-0.67) | 0.44* (0.39-0.49) | 0.42*(0.33-0.54)                |
| Aggressive tumour                                    | 0.88* (0.84-0.93) | 1.12* (1.08-1.16) | 0.84*(0.78-0.90)                |

\*significance at  $p \leq 0.05$

Table 3b- Factors associated with receiving chemotherapy, palliative care or both during the last 30 days in Emilia-Romagna (logistic multivariate model)

| Factor                                                       | Chemotherapy     | Palliative care  | Chemotherapy<br>palliative care |
|--------------------------------------------------------------|------------------|------------------|---------------------------------|
|                                                              | OR (CI 95%)      | OR (CI 95%)      | OR (CI 95%)                     |
| Chemotherapy within the last 30 days ( <i>ref.NO</i> )       | -                | 0.90*(0.85-0.94) | -                               |
| Palliative care within the last 30 days ( <i>ref.NO</i> )    | 0.92*(0.87-0.97) | -                | -                               |
| Haematologic tumour ( <i>ref. solid/metastatic</i> )         | 2.15*(2.01-2.30) | 0.52*(0.49-0.56) | 1.03 (0.92-1.17)                |
| Age (continuous, in year)                                    | 0.95*(0.95-0.95) | 0.99*(0.99-0.99) | 0.96*(0.96-0.96)                |
| Hospital admission within the last 30 days ( <i>ref.NO</i> ) | 1.63*(1.55-1.72) | 0.70*(0.67-0.72) | 1.05 (0.98-1.14)                |
| Surgery within the last 30 days ( <i>ref.NO</i> )            | 0.59*(0.52-0.68) | 0.44*(0.39-0.49) | 0.42*(0.33-0.54)                |
| Aggressive tumour ( <i>ref.NO</i> )                          | 0.88*(0.84-0.92) | 1.12*(1.08-1.16) | 0.84*(0.78-0.90)                |
| LHA 3 ( <i>reference</i> )                                   |                  |                  |                                 |
| LHA 1                                                        | 1.09 (0.97-1.22) | 0.86*(0.79-0.93) | 1.03 (0.87-1.21)                |
| LHA 2                                                        | 0.79*(0.71-0.89) | 0.77*(0.72-0.84) | 0.69*(0.58-0.81)                |
| LHA 3                                                        | 1.04 (0.94-1.14) | 0.80*(0.74-0.85) | 0.91 (0.79-1.05)                |
| LHA 4                                                        | 0.91*(0.84-1.00) | 0.92*(0.86-0.98) | 0.84*(0.73-0.96)                |
| LHA 5                                                        | 0.75*(0.63-0.89) | 1.07 (0.96-1.20) | 0.76*(0.59-0.98)                |
| LHA 6                                                        | 0.92 (0.83-1.02) | 0.96 (0.89-1.04) | 0.89 (0.76-1.04)                |
| LHA 7                                                        | 0.99 (0.90-1.07) | 1.04 (0.97-1.10) | 1.03 (0.91-1.17)                |

\* significance at  $p \leq 0.05$ ; LHA = local health authority

1  
2  
3 **Figure legends**  
4

5 *Figure 1 - Percentage of chemotherapy use during the last 30 days of life, by LHA of residence (all tumours)*  
6

7  
8 *Figure 2 - Percentage of home care services use during the last 30 days of life, by LHA of residence (all*  
9 *tumours)*  
10

11  
12  
13 **Author contributions**  
14

15 GF: conception and design, interpretation of data, drafting the article  
16

17  
18 MM: conception and design, analysis and interpretation of data  
19

20 MG: interpretation of data, revising the article critically for important intellectual content  
21

22 RGG: conception and design, interpretation of data, revising the article critically for important intellectual  
23  
24 content  
25

26  
27  
28  
29 **Acknowledgements:** the authors want to thank Dr Alberto Bagnulo for his comments on a preliminary  
30  
31 version  
32

33 All authors approved the version to be published and agree to be accountable for all aspects of the work in  
34  
35 ensuring that questions related to the accuracy or integrity of any part of the work are appropriately  
36  
37 investigated and resolved  
38  
39

40  
41  
42 **Competing interests:** all authors declare that they do not have competing interests  
43  
44

45  
46  
47 **Funding statement:** this research received no specific grant from any funding agency in the public,  
48  
49 commercial or not-for-profit sectors.  
50

51  
52  
53 **Data sharing statement:** data will be made available upon request  
54  
55

56  
57  
58  
59 **Ethics statement:** this study involves human participants and was approved by an Ethics Committee.  
60

1  
2  
3  
4  
5  
6  
7  
8  
9  
10  
11  
12  
13  
14  
15  
16  
17  
18  
19  
20  
21  
22  
23  
24  
25  
26  
27  
28  
29  
30  
31  
32  
33  
34  
35  
36  
37  
38  
39  
40  
41  
42  
43  
44  
45  
46  
47  
48  
49  
50  
51  
52  
53  
54  
55  
56  
57  
58  
59  
60

Name of the Ethics Committee: Comitato Etico dell'Area Vasta Emilia Nord, Reggio Emilia (Italy)

Reference number for ethics approval : 1032/2020/OSS/AUSLREceived from the Ethics Committee of “Area Vasta Emilia Nord”

## REFERENCES

- 1 Specchia ML, La Torre G, Calabrò GE, Villari P, Grilli R, Federici A, et al. Disinvestment in cancer care: a survey investigating European countries' opinions and views. *Eur J Public Health* 2018;28:987-992
- 2 Blanke CD, Fromme EK. Chemotherapy Near the End of Life: First--and Third and Fourth (Line)--Do No Harm. *JAMA Oncol* 2015;1:785-6
- 3 Chan WL, Lam KO, Siu WK, Yuen KK. Chemotherapy at end-of-life: an integration of oncology and palliative team. *Support Care Cancer*. 2016;24:1421-1427
- 4 Earle, C. C., et al. Aggressiveness of Cancer Care Near the End of Life: Is It a Quality-of-Care Issue? *J Clin Oncol* 2008;26: 3860-3866
- 5 Saito, A. M., et al. (2011). "The effect on survival of continuing chemotherapy to near death." *BMC Palliative Care* 10(1): 14
- 6 Wu CC, Hsu TW, Chang CM, et al. Palliative Chemotherapy Affects Aggressiveness of End-of-Life Care The *Oncologist* 2016;21:771-7
- 7 [Palliative Care. https://www.who.int/cancer/palliative/definition/en/](https://www.who.int/cancer/palliative/definition/en/) (last accessed: Sept 15, 2021)
- 8 Weeks, J. C., et al. Patients' Expectations about Effects of Chemotherapy for Advanced Cancer. *New Engl J Med* 2012;367:1616-1625
- 9 Buiting HM, Terpstra W, Dalhuisen F, Gunnink-Boonstra N, Sonke GS, et al. (2013) The Facilitating Role of Chemotherapy in the Palliative Phase of Cancer: Qualitative Interviews with Advanced Cancer Patients. *PLoS ONE* 8(11): e77959. doi:10.1371/journal.pone.0077959
- 10 Brom, L, Onwuteaka-Philipsen, BD, Widdershoven, GA. Mechanisms that contribute to the tendency to continue chemotherapy in patients with advanced cancer. *Qualitative observations in the clinical setting. Support Care Cancer* 2016; 24:1317-1325
- 11 Hui D. Prognostication of Survival in Patients With Advanced Cancer: Predicting the Unpredictable? *Cancer Control*. 2015; 22:489-97
- 12 Thorne SE, Bultz BD, Baile WF, et al. Is there a cost to poor communication in cancer care?: a critical review of the literature. *Psycho-Oncology* 2005;14: 875-884
- 13 Skov Benthien K, Adersen M, Petersen MA, Soelberg Vadstrup E, Sjøgren P, Groenvold M. Is specialized palliative cancer care associated with use of antineoplastic treatment at the end of life? A population-based cohort study. *Palliative Medicine*. 2018;32:1509-1517
- 14 Norton, S.A., Wittink, M.N., Duberstein, P.R. et al. Family caregiver descriptions of stopping chemotherapy and end-of-life transitions. *Support Care Cancer* 2019;27, 669-675
- 15 Clarke, G, Johnston, S, Corrie, P. Withdrawal of anticancer therapy in advanced disease: a systematic literature review. *BMC Cancer* 2015;15: 892
- 16 Sano M, Fushimi K. Association of Palliative Care Consultation With Reducing Inpatient Chemotherapy Use in Elderly Patients With Cancer in Japan: Analysis Using a Nationwide Administrative Database. *American Journal of Hospice and Palliative Medicine* 2017;34:685-691
- 17 Harrington SE, Smith TJ. The role of chemotherapy at the end of life: "when is enough, enough?". *JAMA*. 2008;299:2667-78.
- 18 Wright AA, Zhang B, Keating NL, Weeks JC, Prigerson HG. Associations between palliative chemotherapy and adult cancer patients' end of life care and place of death: prospective cohort study. *BMJ* 348: g1219
- 19 Neugut AI, Prigerson HG. Curative, Life-Extending, and Palliative Chemotherapy: New Outcomes Need New Names. *Oncologist*. 2017;22:883-5
- 20 Pacetti P, Paganini G, Orlandi M, Mambrini A, Pennucci MC, Del Freato A, et al. Chemotherapy in the last 30 days of life of advanced cancer patients. *Support Care Cancer*. 2015;23:3277-3280
- 21 Smith CB, Phillips T, Smith TJ. Using the New ASCO Clinical Practice Guideline for Palliative Care Concurrent With Oncology Care Using the TEAM Approach. DOI: 10.1200/EDBK\_175474 *American Society of Clinical Oncology Educational Book* 37 (October 29, 2018) 714-723.
- 22 Nappa U, Lindqvist O, Rasmussen BH, Axelsson B. Palliative chemotherapy during the last month of life. *Ann Oncol* 2011; 11: 2375-2380

- 1  
2  
3
- 
- 4 23 Cardona-Morrell M, Kim JCH, Turner RM, Anstey M, Mitchell IA, Hillman K. Non-beneficial treatments in  
5 hospital at the end of life: a systematic review on extent of the problem. *International Journal for Quality in*  
6 *Health Care* 2016;28:456–469
- 7 24 Rochigneux P, Raoul JL, Beaussant Y, Aubry R, Goldwasser F, Tournigand C, Morin L. Use of chemotherapy  
8 near the end of life: what factors matter. *Annals of Oncology* 2017;28:809–817
- 9 25 Prigerson HG, Bao Y, Shah MA, Paulk ME, LeBlanc TW, et al. Chemotherapy Use, Performance Status, and  
10 Quality of Life at the End of Life. *JAMA Oncol* 2015;1:778-784
- 11 26 Massa I et al. Chemotherapy and palliative care near end-of life: examining the appropriateness at a cancer  
12 institute for colorectal cancer patients. *BMC Palliative Care* (2018) 17:86
- 13 27 Pellizzari M, Rolfini M, Ferroni E, Savioli V, Gennaro N, Schievano E, et al. Intensity of integrated cancer  
14 palliative care plans and end-of-life acute medical hospitalisation among cancer patient in Northern Italy.  
15 *Eur J Cancer Care* 2018;27:e12742
- 16 28 Goldstein H. (2003). *Multilevel Statistical Models*. 3rd ed. London, UK: Arnold
- 17 29 Hosmer, D. W. and Lemeshow, S. (2000). *Applied Logistic Regression*. New York, NY: John Wiley & Sons,  
18 Inc., DOI: <https://doi.org/10.1002/0471722146>
- 19 30 Pulte D, Jansen L, Brenner H. Changes in long term survival after diagnosis with common hematologic  
20 malignancies in the early 21st century. *Blood Cancer Journal* 2020;10: Article number 56
- 21 31 Van Metre Baum L, Roseblum R, Scarborough B, Smith CB. Evaluating end-of-life chemotherapy for solid  
22 tumor and hematologic malignancy patients. *Progress in palliative care* 2021.  
23 <https://doi.org/10.1080/09699260.2021.1872138> <https://doi.org/10.1080/09699260.2021.1872138>
- 24 32 Hui D, Didwaniya N, Vidal M, et al. Quality of End-of-Life Care in Patients with Hematologic Malignancies: A  
25 Retrospective Cohort Study. *Cancer* 2014;120:1572–1578.
- 26 33 Odejide OO, Salas Coronado DY, Watts CD, et al. End-of-Life Care for Blood Cancers: A Series of Focus  
27 Groups With Hematologic Oncologists. *J Oncol Pract* 2014;10:e396–e403
- 28 34 Rodriguez MA, DeJesus AY, Cheng L. Use of Chemotherapy Within the Last 14 Days of Life in Patients  
29 Treated at a Comprehensive Cancer Center. *JAMA Intern Med* 2014;174:989-991
- 30 35 Legge 15 marzo 2010 , n. 38. G.U. Serie Generale , n. 65 del 19 marzo 2010
- 31 36 Regione Emilia-Romagna, Assessorato politiche per la salute. Indagine sullo stato di attuazione degli  
32 hospice nella rete di cure palliative dell'Emilia-Romagna anno 2013. [http://salute.regione.emilia-](http://salute.regione.emilia-romagna.it/siseps/sanita/sdhs/files/AO_1_3_All_PG_91336_2015.pdf/view)  
33 [romagna.it/siseps/sanita/sdhs/files/AO\\_1\\_3\\_All\\_PG\\_91336\\_2015.pdf/view](http://salute.regione.emilia-romagna.it/siseps/sanita/sdhs/files/AO_1_3_All_PG_91336_2015.pdf/view) (last accessed: Sept 15, 2021)
- 34 37 Gyawali B, Phillips Hey S, Kesselheim AS. Assessment of the Clinical Benefit of Cancer Drugs Receiving  
35 Accelerated Approval. *JAMA Intern Med.* 2019;179:906-913
- 36 38 Jang RW, Caraiscos VB, Swami N, Banerjee S, Mak E, Kaya E, et al. Simple Prognostic Model for Patients  
37 With Advanced Cancer Based on Performance Status. *Journal of Oncology Practice* 2014;10:e335-e341
- 38 39 Johansen J, Boisen MK, Mellempgaard A, Holm B. Prognostic value of ECOG performance status in lung  
39 cancer assessed by patients and physicians. *Journal of Clinical Oncology* 2013 31:15\_suppl, 8103-8103
- 40 40 Maltoni M, Caraceni A, Brunelli C, et al: Prognostic factors in advanced cancer patients: evidence-based  
41 clinical recommendations—a study by the Steering Committee of the European Association for Palliative  
42 Care. *J Clin Oncol* 2005;23:6240-6248
- 43 41 Simmons CPL, McMillan DC, McWilliams K, Sande TA, Fearon KC, Tuck S, et al. Prognostic Tools in Patients  
44 With Advanced Cancer: A Systematic Review. *J Pain Symptom Manage* 2017;53:962-970
- 45 42 Maltoni M, Nanni O, Pirovano M, Scarpi E, Indelli M, Martini C, et al. Successful Validation of the Palliative  
46 Prognostic Score in Terminally Ill Cancer Patient. *Journal of Pain and Symptom Management* 1999;17:240–7
- 47 43 Tarumi Y, Watanabe SM, Lau F, Yang J, Quan H, Sawchuk L, et al. Evaluation of the Palliative Prognostic  
48 Score (PaP) and Routinely Collected Clinical Data in Prognostication of Survival for Patients Referred to a  
49 Palliative Care Consultation Service in an Acute Care Hospital. *J Pain Symptom Manage* 2011;42:419e431
- 50 44 Glare PA, Eychmueller S, McMahon P. Diagnostic Accuracy of the Palliative Prognostic Score in Hospitalized  
51 Patients With Advanced Cancer. *Journal of Clinical Oncology* 2004;22:4823-8
- 52 45 Hui D, Park M, Liu D, Paiva CE, Suh SY, Morita T, Bruera E. Clinician prediction of survival versus the  
53 Palliative Prognostic Score: Which approach is more accurate? *European Journal of Cancer* 2016;64:89-95
- 54  
55  
56  
57  
58  
59  
60

- 1  
2  
3
- 
- 4 46 Back AL, Anderson WG, Bunch L, Marr LA, Wallace JA, Yang HB, Arnold RM. Communication about cancer  
5 near the end of life. *Cancer* 2008;113(7 Suppl):1897–1910
- 6 47 Rietjens JAC, Sudore RL, Connolly M, van Delden JJ, Drickamer MA, Droger M, et al. Definition and  
7 recommendations for advance care planning: an international consensus supported by the European  
8 Association for Palliative Care. *Lancet Oncol.* 2017;18:e543–51. 10.1016/S1470-2045(17)30582-X
- 9 48 Starr, Lauren T et al. “Associations Among End-of-Life Discussions, Health-Care Utilization, and Costs in  
10 Persons With Advanced Cancer: A Systematic Review.” *The American journal of hospice & palliative*  
11 *care* vol. 36,10 (2019): 913-926.
- 12 49 IOM IoM. *Dying in America: Improving Quality and Honoring Individual Preferences Near the End of*  
13 *Life* Washington, DC: IOM; 2015. March 19 2015
- 14 50 Schulman-Green D, Smith CB, Lin JJ, Feder S, Bickell NA. Oncologists’ and patients’ perceptions of initial,  
15 intermediate, and final goals of care conversations. *J Pain Symptom Manage* 2018;55:890-6
- 16 51 Ferrell BR, Temel JS, Temin S, et al. Integration of Palliative Care Into Standard Oncology Care: American  
17 Society of Clinical Oncology Clinical Practice Guideline Update. *Journal of Clinical Oncology* 2017;35:96–112
- 18 52 O’Connor NR, Junker P, Appel SM, Stetson RL, Rohrbach J, Meghani SH. Palliative Care Consultation for  
19 Goals of Care and Future Acute Care Costs: A Propensity-Matched Study. *Am J Hosp Palliat Care.*  
20 2017:1049909117743475
- 21 53 Ma-Kellams C, Lerner JS. Trust Your Gut or Think Carefully?: Examining Whether an Intuitive, Versus a  
22 Systematic, Mode of Thought Produces Greater Empathic Accuracy. *Journal of Personality and Social*  
23 *Psychology* 2016;111:674-685.
- 24 54 Back AL, Fromme EK, Meier DE. Training Clinicians with Communication Skills Needed to Match Medical  
25 Treatments to Patient Values. *J Am Geriatr Soc* 67:S435–S441, 2019
- 26 55 Visser M, Deliens L, Houttekier D. Physician-related barriers to communication and patient- and family-  
27 centred decision-making towards the end of life in intensive care: a systematic review. *Critical Care*  
28 2014;18:604
- 29 56 Banerjee, S. C., Manna, R., Coyle, N., Shen, M. J., Pehrson, C., Zaider, T., Hammonds, S., Krueger, C. A.,  
30 Parker, P. A., & Bylund, C. L. (2016). Oncology nurses' communication challenges with patients and families:  
31 A qualitative study. *Nurse education in practice*, 16(1), 193–201.
- 32 57 Baer L, Weinstein E. Improving oncology nurses’ communication skills for difficult conversations. *Clin J*  
33 *Oncol Nurs.* 2013;17:E45–E51
- 34 58 Hack TF, Ruether JD, Pickles T, et al. Behind closed doors II: systematic analysis of prostate cancer patients’  
35 primary treatment consultations with radiation oncologists and predictors of satisfaction with  
36 communication. *Psycho-Oncology.* 2012;21:809–817
- 37 59 Page JP, Lederman L, Kelly J, Barry MM, and James AT Teams and Teamwork in Cancer Care Delivery:  
38 Shared Mental Models to Improve Planning for Discharge and Coordination of Follow-Up Care *Journal of*  
39 *Oncology Practice* 2016 12:11, 1053-1058
- 40 60 Simpson N, Milnes S, Martin P, et al. Validate: a communication-based clinical intervention in life-limiting  
41 illness *BMJ Supportive & Palliative Care* Published Online First: 11 April 2019. doi: 10.1136/bmjspcare-2018-  
42 001669
- 43 61 Walczak A, Butow PN, Bu S, MClayton JM. A systematic review of evidence for end-of-life communication  
44 interventions: Who do they target, how are they structured and do they work? *Patient Education and*  
45 *Counseling* 2016;99:3-16
- 46  
47  
48  
49  
50  
51  
52  
53  
54  
55  
56  
57  
58  
59  
60



1  
2  
3  
4  
5  
6  
7  
8  
9  
10  
11  
12  
13  
14  
15  
16  
17  
18  
19  
20  
21  
22  
23  
24  
25  
26  
27  
28  
29  
30  
31  
32  
33  
34  
35  
36  
37  
38  
39  
40  
41  
42  
43  
44  
45  
46  
47  
48  
49  
50  
51  
52  
53  
54  
55  
56  
57  
58  
59  
60

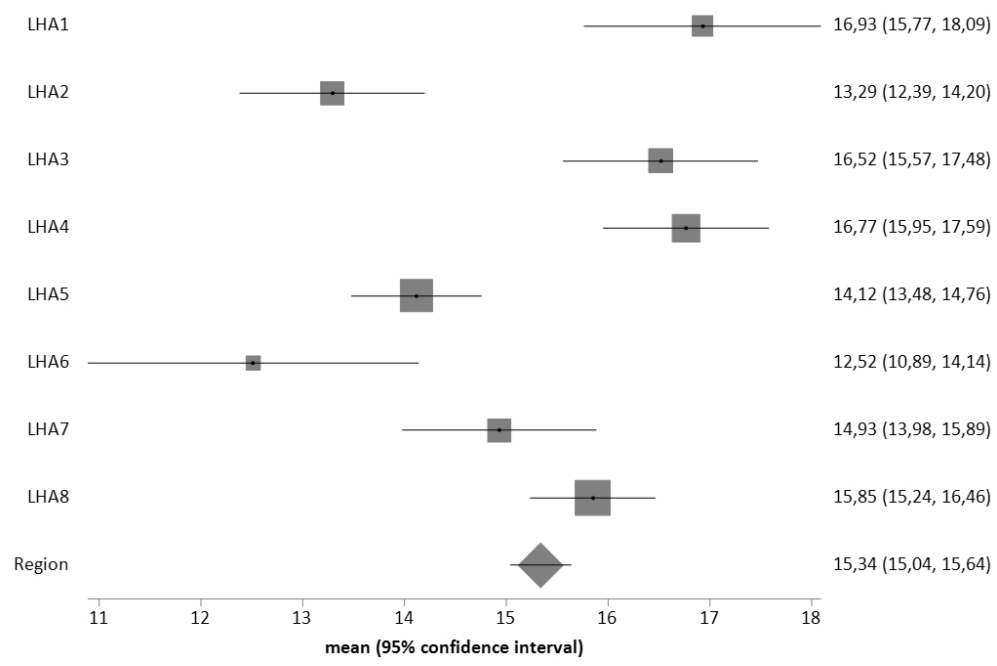

Figure 1 - Percentage of anticancer drug use during the last 30 days of life, by LHA of residence (all tumours)

86x57mm (300 x 300 DPI)

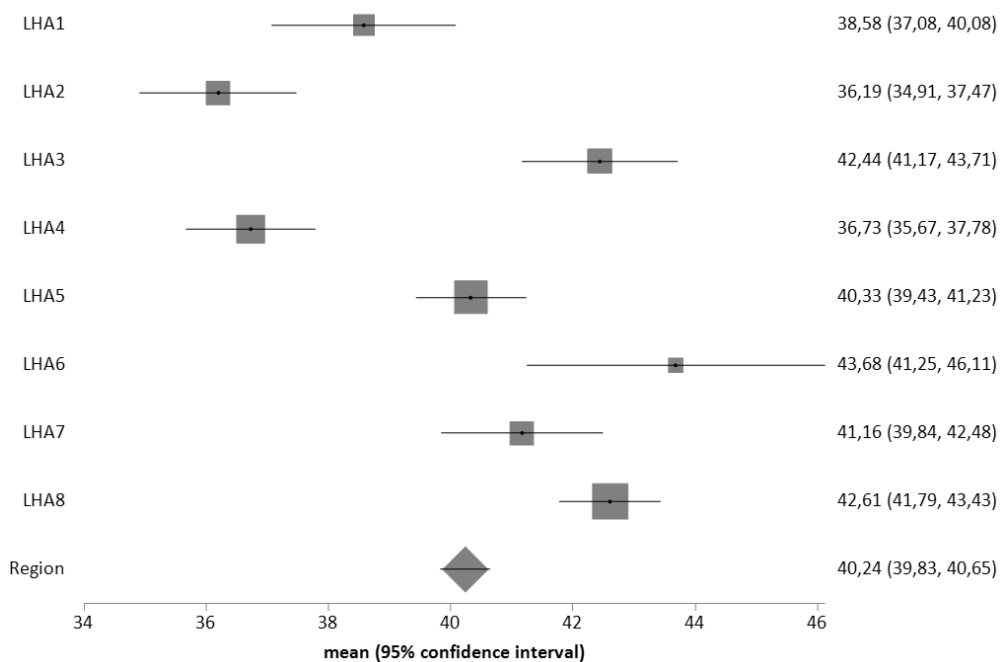

Figure 2 - Percentage of home care services use during the last 30 days of life, by LHA of residence (all tumours)

85x58mm (300 x 300 DPI)

# BMJ Open

## End of life care in cancer patients: how much drug therapy and how much palliative care? Record linkage study in Northern Italy

|                                 |                                                                                                                                                                                                                                                                                                                                                                                                                                                                                                                                                       |
|---------------------------------|-------------------------------------------------------------------------------------------------------------------------------------------------------------------------------------------------------------------------------------------------------------------------------------------------------------------------------------------------------------------------------------------------------------------------------------------------------------------------------------------------------------------------------------------------------|
| Journal:                        | <i>BMJ Open</i>                                                                                                                                                                                                                                                                                                                                                                                                                                                                                                                                       |
| Manuscript ID                   | bmjopen-2021-057437.R1                                                                                                                                                                                                                                                                                                                                                                                                                                                                                                                                |
| Article Type:                   | Original research                                                                                                                                                                                                                                                                                                                                                                                                                                                                                                                                     |
| Date Submitted by the Author:   | 20-Jan-2022                                                                                                                                                                                                                                                                                                                                                                                                                                                                                                                                           |
| Complete List of Authors:       | Formoso, Giulio; Reggio Emilia Local Agency - IRCCS Advanced Technologies and Care Models in Oncology, Clinical Governance Unit Marino, Massimiliano; Reggio Emilia Local Agency - IRCCS Advanced Technologies and Care Models in Oncology, Clinical Governance Unit Guberti, Monica; Reggio Emilia Local Agency - IRCCS Advanced Technologies and Care Models in Oncology, Department of Health Professions Grilli, Roberto Giuseppe; Reggio Emilia Local Agency - IRCCS Advanced Technologies and Care Models in Oncology, Clinical Governance Unit |
| <b>Primary Subject Heading</b>: | Oncology                                                                                                                                                                                                                                                                                                                                                                                                                                                                                                                                              |
| Secondary Subject Heading:      | Epidemiology, Health services research, Palliative care, Public health                                                                                                                                                                                                                                                                                                                                                                                                                                                                                |
| Keywords:                       | CHEMOTHERAPY, ONCOLOGY, PALLIATIVE CARE                                                                                                                                                                                                                                                                                                                                                                                                                                                                                                               |
|                                 |                                                                                                                                                                                                                                                                                                                                                                                                                                                                                                                                                       |

SCHOLARONE™  
Manuscripts



I, the Submitting Author has the right to grant and does grant on behalf of all authors of the Work (as defined in the below author licence), an exclusive licence and/or a non-exclusive licence for contributions from authors who are: i) UK Crown employees; ii) where BMJ has agreed a CC-BY licence shall apply, and/or iii) in accordance with the terms applicable for US Federal Government officers or employees acting as part of their official duties; on a worldwide, perpetual, irrevocable, royalty-free basis to BMJ Publishing Group Ltd ("BMJ") its licensees and where the relevant Journal is co-owned by BMJ to the co-owners of the Journal, to publish the Work in this journal and any other BMJ products and to exploit all rights, as set out in our [licence](#).

The Submitting Author accepts and understands that any supply made under these terms is made by BMJ to the Submitting Author unless you are acting as an employee on behalf of your employer or a postgraduate student of an affiliated institution which is paying any applicable article publishing charge ("APC") for Open Access articles. Where the Submitting Author wishes to make the Work available on an Open Access basis (and intends to pay the relevant APC), the terms of reuse of such Open Access shall be governed by a Creative Commons licence – details of these licences and which [Creative Commons](#) licence will apply to this Work are set out in our licence referred to above.

Other than as permitted in any relevant BMJ Author's Self Archiving Policies, I confirm this Work has not been accepted for publication elsewhere, is not being considered for publication elsewhere and does not duplicate material already published. I confirm all authors consent to publication of this Work and authorise the granting of this licence.

1  
2  
3 **End of life care in cancer patients: how much drug therapy and how much palliative care? Record linkage**  
4  
5 **study in Northern Italy**  
6  
7

8 Giulio Formoso <sup>a</sup> ([giulio.formoso@ausl.re.it](mailto:giulio.formoso@ausl.re.it))  
9

10  
11 Massimiliano Marino <sup>a</sup> ([massimiliano.marino@ausl.re.it](mailto:massimiliano.marino@ausl.re.it))  
12

13  
14 Monica Guberti <sup>b</sup> ([monica.guberti@ausl.re.it](mailto:monica.guberti@ausl.re.it))  
15

16  
17 Roberto Giuseppe Grilli <sup>a</sup> ([robertogiuseppe.grilli@ausl.re.it](mailto:robertogiuseppe.grilli@ausl.re.it))  
18  
19  
20  
21  
22

23  
24 a. Reggio Emilia Local Agency - IRCCS Advanced Technologies and Care Models in Oncology, Clinical  
25  
26 Governance Unit, Reggio Emilia, Emilia-Romagna, IT  
27

28  
29 b. Reggio Emilia Local Agency - IRCCS Advanced Technologies and Care Models in Oncology (Italy), Department  
30  
31 of Health Professions, Reggio Emilia, Emilia-Romagna, IT  
32  
33  
34  
35  
36

37 **Corresponding author:** Giulio Formoso  
38

39 Via Amendola 2; 42122 Reggio Emilia (Italy)  
40

41  
42 E-mail: [giulio.formoso@ausl.re.it](mailto:giulio.formoso@ausl.re.it)  
43  
44  
45

46 **Participant consent:** not required (the study cohort was made up of deceased patients)  
47  
48  
49  
50  
51  
52  
53  
54  
55  
56  
57  
58  
59  
60

1  
2  
3 **Abstract** (word count: 298 words)  
4

5 **Objectives**  
6

7 Investigating use of anticancer drugs and of palliative care services in the last month of life.  
8  
9

10 **Design**  
11

12 Population based cohort linked to mortality registry and administrative databases.  
13

14 **Setting**  
15

16 Emilia-Romagna Region (Northern Italy – 4,4 million residents).  
17  
18

19 **Participants**  
20

21 55,625 residents who died of cancer between 2017 and 2020.  
22

23 **Primary and secondary outcome measures**  
24

25 Multivariate analyses were carried out to assess the relationship between cancer drug therapy and palliative  
26 care services, and their association with factors related to tumour severity.  
27  
28

29 **Results**  
30

31 In the last month of life, 15.3% of study population received anticancer drugs (from 12.5% to 16.9% across the  
32 eight local health authorities - LHA) and 40.2% received palliative care services (from 36.2% to 43.7%). The  
33 likelihood to receive anticancer drugs or palliative care was associated with LHA of residence. Drug therapy was  
34 inversely associated with receiving palliative care services within the last 30 days (odds ratio 0.92), surgery within  
35 the last 6 months (OR 0.59), aggressive tumours (OR 0.88) and increasing age (OR 0.95), whereas they increased  
36 in case of haematologic tumours (OR 2.15) and hospital admissions within the last 6 months (OR 1.63). The  
37 likelihood to receive palliative care went in the opposite direction in case of haematologic tumours (OR 0.52)  
38 and hospital admissions within the last 6 months (OR 0.70), and in presence of aggressive tumours (OR 1.12);  
39 surgery (OR 0.44), receiving anticancer drugs during the last 30 days (OR 0.90) and increasing age (OR 0.99) were  
40 inversely associated with it. All these results were statistically significant.  
41  
42  
43  
44  
45  
46  
47  
48  
49  
50  
51  
52  
53

54 **Conclusion**  
55  
56  
57  
58  
59  
60

1  
2  
3 Use of anticancer drugs and palliative care in the last month of life were inversely associated, with relatively  
4  
5 high variability across different LHAs in spite of similar epidemiology/case mix and availability of services. While  
6  
7 administrative data have limits, our findings are in line with conclusions of other studies.  
8  
9  
10  
11  
12  
13  
14  
15  
16  
17  
18  
19  
20  
21  
22  
23  
24  
25  
26  
27  
28  
29  
30  
31  
32  
33  
34  
35  
36  
37  
38  
39  
40  
41  
42  
43  
44  
45  
46  
47  
48  
49  
50  
51  
52  
53  
54  
55  
56  
57  
58  
59  
60

**Article summary: strengths and limitations of this study**

- Inclusion of all people deceased from cancer in a Region with 4,4 million residents, linking information on use of anticancer drugs and palliative care services with tumour characteristics and severity, are major strengths of this study.
- Caution should be taken since administrative data could not capture all the elements that may contribute to clinical decision making
- Moreover, although multivariate analyses provide adjustment for factors associated with tumour severity, residual confounding may be present

**Keywords:**

- End of life care
- Anticancer drug therapy
- Palliative care
- Cancer



1  
2  
3 TEXT (word count: 3049 words, excluding tables, figures and references)  
4  
5  
6

## 7 **Introduction**

8  
9 The appropriate use of anticancer drugs in end-of-life care is increasingly debated, both for clinical and  
10 economic reasons. [1,2] Aggressive treatments, facilitated by the availability of newer anticancer agents that  
11 have fewer side effects, [3] often do not alleviate patients' condition or provide hope for extending  
12 significantly life of decent quality. Focus on clinically irrelevant treatments may lead to the underuse of  
13 palliative care, [4,5,6] defined by WHO as "an approach that improves the quality of life of patients and their  
14 families facing the problem associated with life-threatening illness, through ... assessment and treatment of  
15 pain and other problems, physical, psychosocial and spiritual". [7] Palliative care is generally provided in  
16 dedicated hospices or as home care services by a specially trained team of doctors, nurses and other  
17 specialists who work together with a patient's other doctors to provide an extra layer of support.  
18 [8,9] Expectations of patients' and parents on one side, [10] and difficulties in predicting and communicating  
19 patients' prognosis on the other, [11,12] are among the main determinants of overuse of anticancer drugs (box).  
20 Some patients may perceive continued active treatment as the only acceptable option. [10] For example, in a  
21 prospective cohort of terminally ill patients with cancer (n = 386), 31% preferred life-extending care rather than  
22 comfort care and as many as 77% preferred to receive drug treatment even if it would extend their life by only  
23 one week. [12] Communication between the care team, patient and family seem to be a central element that  
24 can influence this phenomenon. [13]  
25  
26 From the clinicians' point of view, withdrawal of drugs during the final, but not exactly predictable, stages of  
27 life is challenging [14]: early withdrawal can cause potential harm, whereas late withdrawal would involve  
28 unnecessary treatment and stress (box). Research findings suggest that culture may impact the utilization of  
29 aggressive treatment in patients with advanced cancer. For example, a study from Japan stated that only 3.7%  
30 of patients receive chemotherapy in their last 2 weeks of life [15]  
31  
32 However, anticancer therapy itself is frequently considered a form of palliative care, aimed at reducing  
33 tumour-related symptoms, so that boundaries between curative and palliative intent are sometimes difficult  
34 to establish (box). [16,17,18] According to the American Society of Clinical Oncology (ASCO), anticancer drugs

1  
2  
3 can potentially improve QOL in late stages of life even if they don't impact survival length [19]. In this regard,  
4  
5 their use promotes a simultaneous care approach, using palliative care alongside usual oncology care as the  
6  
7 standard of care for any patient with advanced cancer. [20]  
8

9  
10 Several studies have analysed use of anticancer drugs in the last weeks of life with results that, although  
11  
12 variable, show a tendency to prolong treatment beyond realistic expectations of a favourable benefit-risk  
13  
14 ratio.[16,21,22,23,24,25,26] Analysis of data available in administrative and clinical databases can inform  
15  
16 about prescribing patterns and the utilization of health care services in the end of life, in order to provide  
17  
18 useful basis for discussion helping clinicians and health care managers identify areas of improvement, enhance  
19  
20 the appropriateness and value of cancer care and make judicious use of available resources. In keeping with  
21  
22 these targets, this study aims at providing insights on the use of anticancer drugs, hospital, hospice and home  
23  
24 care services in the last month of life in a region of Northern Italy with more than 4 million residents, also to  
25  
26 assess whether palliative care services are inversely associated with overuse of antineoplastic therapy.  
27  
28  
29  
30  
31

## 32 **Methods**

33  
34 A cohort of residents in the Emilia-Romagna Region who had cancer as the underlying cause of death between  
35  
36 2017 and 2020 (ICD-X classification: *C00-C97, D00-D09, D37-D48*) were selected from the regional mortality  
37  
38 registry. This cohort was linked with the routinely available administrative databases, specifically: 1) hospital  
39  
40 discharge records (including inpatient use of anticancer drugs, type of tumour, patients' age, surgery and  
41  
42 hospital admissions); 2) ambulatory services (specifying use of anticancer drugs); 3) outpatient  
43  
44 pharmacological prescriptions (use of drugs within ATC classes L01 and L02); 4) hospice and 5) domiciliary care  
45  
46 databases (also collectively considered as palliative care services). Data were anonymized and record linkage  
47  
48 procedures were performed according to the unique identification number, assigned to each resident and  
49  
50 available in each of the databases. A list of codes used to select hospital discharge information and ambulatory  
51  
52 care is available in the appendix.  
53  
54

55  
56 Analyses were specifically aimed at describing frequency of anticancer drug use, palliative care services or  
57  
58 both received within the last 30 days of life among eight Local Health Authorities (LHA). Logistic multivariate  
59  
60

1  
2  
3 two-level analyses [27] were carried out to assess whether 1) anticancer drug use, 2) palliative care services 3)  
4 or both within the last 30 days of life could be associated with each other as well as with type of tumour (solid  
5 vs haematological, or aggressive tumours - see list in the appendix), patients' age, any surgery and hospital  
6 admissions within the last 6 months, considering LHA clustering as the second level (random intercept) to  
7 eliminate the effect of a possible correlation of results of residents in the same province. One-level models,  
8 [28] adding each LHA as covariates (each compared to a reference LHA) were subsequently used to assess  
9 whether use of anticancer drugs and of palliative care could present variability among LHA. Odds ratio with  
10 95% confidence intervals were calculated. SAS version 8.2 (SAS Institute inc., Cary, NC, USA) and STATA/SE  
11 version 16.1 (STATA Corp, College Station, TX 77845) were used for statistical analyses.

12  
13  
14  
15  
16  
17  
18  
19  
20  
21  
22  
23 *Patient and Public Involvement:* no patient involved.  
24  
25  
26  
27

## 28 **Results**

29  
30  
31 In Emilia-Romagna, 55,625 people died from cancer between January 1, 2017 and December 31, 2020. Table 1  
32 quantifies the main cancer diagnosis associated with death, by LHA: no substantial differences are shown  
33 among different LHAs. Table 2 shows use of anticancer drugs and of palliative care services within the last 30  
34 days of life by main cancer diagnosis in the whole cohort. The highest use of anticancer drugs was in people  
35 with breast, prostate and haematologic tumours (in more than 20% of patients), whereas the lowest use was  
36 in people with nervous system and urinary tumours (in less than 10% of patients). Use of palliative care  
37 services appears relatively uniform across tumour types, except for a lower observed use in genital tumours in  
38 men and in haematologic tumours. Overall, 15.3% of patients received anticancer drugs within the last 30 days  
39 of life, with an increasing trend from 2017 (14.6%) to 2020 (16.2%). About palliative care services, 40.2% of  
40 patients received them (from 39.7% in 2017 to 40.8% in 2020). 4.1% received surgery within the last 30 days.  
41 Among the eight local health authorities, there was variability in the use of anticancer drugs (from 12.5% to  
42 16.9% - Figure 1) and of palliative care (from 36.2% to 43.7% - Figure 2) in the last 30 days of life. 39.1% of  
43 patients died in hospital, with wide variability among the LHAs (range: from 29.4% to 44.0%).  
44  
45  
46  
47  
48  
49  
50  
51  
52  
53  
54  
55  
56  
57  
58  
59  
60

1  
2  
3 The likelihood to receive anticancer drugs during the last 30 days of life increased by 115% in case of  
4  
5 haematologic tumours, and by 63% in case of hospital admissions within the last 30 days. It was reduced by  
6  
7 41% for surgery within the last 30 days, by 12% for aggressive tumours, by 8% for receiving home care or  
8  
9 hospice services during the last 30 days and by 5% for every year of increasing age (Table 3). The intracluster  
10  
11 correlation coefficient (ICC) is 0.3%, showing low intra-LHA correlation.  
12  
13  
14

15 The likelihood to receive palliative care during the last 30 days of life increased by 12% in presence of  
16  
17 aggressive tumours. It was reduced by 48% in case of haematologic tumours, by 30% for hospital admissions  
18  
19 within the last 30 days, by 56% in case of surgery within the last 30 days, by 10% if receiving anticancer drugs  
20  
21 during the last 30 days and by 5% for every year of increasing age (Table 3). Also in this case, the intracluster  
22  
23 correlation coefficient (0.3%) shows no intra LHA correlation.  
24  
25  
26

27 The likelihood to receive concurrent anticancer drugs and palliative care during the last 30 days of life was  
28  
29 reduced by 16% in case of aggressive tumours, in keeping with the result of the first model, suggesting that  
30  
31 clinicians in such cases tend not to insist on drug therapy (Table 3). Also in this case, the intracluster  
32  
33 correlation coefficient (0.4%) shows no intra-LHA correlation.  
34  
35  
36

37 Since no effect of clustering of subjects in the 8 LHAs was shown, we replicated the latter models without LHA  
38  
39 clustering and including LHA as covariates, in order to assess variability among LHAs (Extra table). Covariate  
40  
41 coefficients are the same as in the cluster models, confirming no effect of LHA clustering on the outcome. As  
42  
43 raw data suggested in Figure 1 and Figure 2, place of residence may also be associated with the likelihood to  
44  
45 receive end-of-life drug therapies and palliative care after adjusting for the other covariates.  
46  
47  
48  
49  
50  
51

## 52 Discussion

53  
54

55 This study shows that use of anticancer drugs and of palliative care services in the last month of life are  
56  
57 inversely associated rather than complementary, suggesting the need to further explore the hypothesis that  
58  
59 palliative care services may have a role in preventing inappropriate use of anticancer drugs. A variable use of  
60

1  
2  
3 anticancer drugs and of palliative care services in different LHAs and across different tumours in the last  
4  
5 month of life is also shown. Compared to solid cancers, haematologic tumours tend to be treated more  
6  
7 frequently with anticancer drugs and to be provided less frequently with palliative care. This circumstance  
8  
9 could be related to the more frequent availability of effective in-hospital therapies leading to longer survival  
10  
11 [29], to perceiving a more favourable benefit-risk ratio of “not giving up”, and to the often rapid pace of  
12  
13 decline near death. This has also been observed in other studies. [30,31,32,33] An opposite pattern is  
14  
15 associated with aggressive tumours, treated more frequently with palliative care and less frequently with  
16  
17 anticancer drugs.  
18  
19

20  
21 Variability among different LHAs may depend either on a different epidemiological distribution of the tumours  
22  
23 and of their severity, or on different prescribing attitudes and availability of palliative services in the areas of  
24  
25 residence. Main cancer diagnosis associated with death appear similar across different LHA. In addition,  
26  
27 multivariate analyses provide adjustment for factors associated with tumour severity (age, haematologic  
28  
29 tumour, previous surgery and hospital admission) and, although residual confounding can be reasonably  
30  
31 present, we consider unlikely that it could provide the main explanation for the observed variability.  
32  
33

34  
35 Therefore, despite limits in our data and taking the possibility of unobserved factors (residual confounding)  
36  
37 into account, we consider that this variability may be explained to a higher degree by different prescribing and  
38  
39 management attitudes rather than by local epidemiology/case mix. As for the availability of palliative services  
40  
41 in the areas of residence, the Emilia-Romagna Region has been quite active in implementing a national law  
42  
43 issued in 2010 [34] to guarantee such availability as well as adequate access to these services. [35] Further  
44  
45 qualitative research could analyse whether attitudes and level of endorsement in different LHA may in part  
46  
47 explain differential use/access, aside from their availability which is relatively homogeneous across the region.  
48  
49 Inclusion of all people deceased from cancer in a Region with 4,4 million residents, linking information on use  
50  
51 of anticancer drugs and palliative care services with tumour characteristics and severity, are major strengths of  
52  
53 this study. However, our results should be taken with caution since administrative data are grossly descriptive  
54  
55 and have obvious limits in capturing all the elements that may contribute to clinical decision making. As for  
56  
57 quality and completeness of available data, they are collected as part of the patient’s care: reimbursements to  
58  
59  
60

1  
2  
3 health services depend on their completeness, which can be assumed and which should exclude the possibility  
4  
5 of major biases. However, no scientific validation of the databases used and of the record-linkage procedures  
6  
7 is available, although the unique patient identification number present in all the databases should ensure that  
8  
9 no data is lost.

10  
11  
12 Nonetheless, our findings are in line with conclusions of several other studies. There may be a potential to  
13  
14 reduce use of end of life anticancer therapies increasing at the same time the provision of palliative care  
15  
16 services. In general, shifting resources from aggressive pharmacological treatments to comprehensive  
17  
18 approaches to palliative care services should be a priority in cancer care, and palliative care may be one of the  
19  
20 determinants “protecting” against the overuse of anticancer drugs. While the high variability observed among  
21  
22 Local Health Authorities in the use of these services is worrying, it also suggests that a huge potential exists to  
23  
24 better organize end of life care for cancer patients.

25  
26  
27 Clinical and administrative data can help promote discussion among oncologists, specialists in palliative care,  
28  
29 nurses, general practitioners, pharmacists, health care managers and (ideally) patients' representatives to  
30  
31 maximize quality of end of life care, especially in blood malignancies, in light of available resources. Local  
32  
33 multidisciplinary groups can/should use data to analyse possible determinants of inappropriate care and  
34  
35 propose strategies to offer patients and their families the best possible support. This especially in light of the  
36  
37 increasing availability and accelerated approval of new therapies [36] that often have a limited added value  
38  
39 but a wide range of indications, targeting resistant cases and/or administered by oral route. These  
40  
41 circumstances may favour an increase in the use of anticancer drugs, sometimes (or often) without a real  
42  
43 clinical benefit, and may hinder or delay access to palliative care services.

44  
45  
46  
47 Data on pharmacoutilization can also help local multidisciplinary groups to discuss to what extent anticancer  
48  
49 drugs are used with a palliative intent, and to foster the design of research protocols aimed at evaluating the  
50  
51 impact of drug utilization on patients' quality of life (QoL). Record linkage studies generally cannot provide  
52  
53 such specific information, since QoL information is generally unavailable in administrative databases, and this  
54  
55 is also one of the limits of our study. A few RCTs and systematic reviews addressing different types of tumours  
56  
57 have shown some effect of different anticancer therapies on reducing pain and improving patients' quality of  
58  
59  
60

1  
2  
3 life [37,38,39,40,41,42]. However, this issue is largely debated as evidence is controversial or lacking, so that  
4  
5 the guideline from the European Society for Medical Oncology (ESMO) explicitly contraindicates the use of  
6  
7 anticancer drugs in the last weeks of life. [43]  
8

9  
10 The availability of adequate prognostic tools is key to discuss appropriateness of end-of-life care: in theory,  
11  
12 performance status can be used as such to guide clinicians and palliative care specialists to make choices for  
13  
14 appropriate health care. [44] Aside from ECOG performance status that may be variably weighed by  
15  
16 physicians, often leading to optimistic assessments, [45] other prognostic tools should be warranted. In 2005,  
17  
18 the European Association for Palliative Care made recommendations in this regard [46] and prognostic tools  
19  
20 have been developed and validated. [47] Yet, most of them depend on the evaluation of functional status,  
21  
22 which is largely subjective and may lead to optimistic estimates to justify the use of aggressive therapies.  
23  
24 Objective assessment of functional status has been advocated, for example the measurement of a surrogate  
25  
26 like skeletal muscle mass through imaging techniques. [31] A palliative prognostic score integrating subjective  
27  
28 judgments with a series of more objective parameters has been validated and extensively discussed, showing a  
29  
30 good balance between accuracy and applicability in clinical practice. [48,49,50,51] Routine use of this kind of  
31  
32 prognostic tools would certainly require adequate promotion among clinicians. Again, the objective should be  
33  
34 to warrant the most appropriate care given the patients' clinical status, avoiding overtreatments that could  
35  
36 worsen their quality of life, diverting attention from "truly palliative" care.  
37  
38

39  
40 However, to fulfil this goal, the use of more accurate prognostic assessments does not seem sufficient.  
41  
42

43  
44 Physicians should be prepared to address patients' and relatives' concerns and expectations by refining their  
45  
46 communication skills in specific kinds of situations like communication at diagnosis, discussion of prognosis,  
47  
48 decision-making about palliative anticancer therapy, transitions to palliative care and preparation of patients  
49  
50 and families for dying and death, and more widespread use of advanced care planning (ACP) [52]. [53].  
51

52  
53 Interventions that include communication about ACP and care preferences have been found to improve  
54  
55 concordance between care preferences and actual care delivered. [54]  
56

57  
58 To better align care with preferences, the National Academy of Medicine and the American Society of Clinical  
59  
60 Oncology recommend patients and providers have goals-of-care (GOC) conversations, [55] all of which may

1  
2  
3 occur in ACP, [56] and that palliative care, typically involving such discussions, [8] be integrated into standard  
4  
5 oncology care. [57] Also nurses play a pivotal role in accompanying patients and their families through their  
6  
7 cancer journey, being in an ideal position [58, 59] to provide cancer patients and their families with emotional  
8  
9 and social support, together with adequate communication about the diagnosis, prognosis and treatment  
10  
11 alternatives [58,60]. Cancer care is multidisciplinary: it requires effective communication also within the team,  
12  
13 and recognizing to be part of a team. In this regard, it is essential to propose shared training between the  
14  
15 entire care team and to develop organizational models and work tools to fulfil this goal. [9,58]  
16  
17 Promotion of enhanced health professional-patient communication and shared decision making can be  
18  
19 effectively achieved [61] but would benefit from a system-wide approach considering several elements like  
20  
21 inclusion of communication skills in clinical competencies needed for credentialing, incentives to provide and  
22  
23 to seek effective training, system capacity to record communication with patients in electronic medical records  
24  
25 and multi-focal and interdisciplinary team support for serious illness communication.[45,62]  
26  
27  
28  
29  
30  
31  
32

### 33 **Conclusion**

34  
35  
36 A multidisciplinary approach involving clinicians, nurses, specialists in palliative care, pharmacists, health care  
37  
38 managers and members of the public is needed to investigate macro issues highlighted through administrative  
39  
40 data, to promote the use of better prognostic tools and a more comprehensive approach to end-of-life cancer  
41  
42 care, limiting use of aggressive treatments that are not beneficial or that could even worsen quality of life. We  
43  
44 are implementing this approach in our Local Health Authority. However, we advocate that such local efforts  
45  
46 should be nested within a system-wide approach to promote effective physician-patient communication,  
47  
48 thoroughly integrating communication skills among the clinical competencies doctors need to achieve. These  
49  
50 are especially needed in end-of-life care.  
51  
52  
53  
54  
55  
56  
57  
58  
59  
60



1  
2  
3 *Box. Main determinants of potential overuse of anticancer drugs*  
4

- 5 • Expectations of patients' and parents (and "never give up" attitude)
  - 6 • difficulties in predicting patients' prognosis
  - 7 • difficulties in communicating patients' prognosis
  - 8 • physician's perception of potential harm by early withdrawal
  - 9 • therapy seen as a form of palliative care
- 10  
11  
12  
13  
14  
15  
16  
17  
18  
19  
20  
21  
22  
23  
24  
25  
26  
27  
28  
29  
30  
31  
32  
33  
34  
35  
36  
37  
38  
39  
40  
41  
42  
43  
44  
45  
46  
47  
48  
49  
50  
51  
52  
53  
54  
55  
56  
57  
58  
59  
60

Table 1 – Study population of patients dying for cancer in Emilia-Romagna between 2017 and 2020, by tumour site and local health authority (LHA): number (white background) and percentage (grey background)

|                  | LHA1  | LHA2  | LHA3  | LHA4  | LHA5   | LHA6  | LHA7  | LHA8   | Region |
|------------------|-------|-------|-------|-------|--------|-------|-------|--------|--------|
| Head & neck      | 105   | 137   | 157   | 221   | 296    | 43    | 164   | 316    | 1,439  |
|                  | 2.6   | 2.5   | 2.7   | 2.7   | 2.6    | 2.7   | 3.1   | 2.3    | 2.6    |
| Digestive        | 1,422 | 1,803 | 1,825 | 2,571 | 3,507  | 504   | 1,638 | 4,305  | 17,575 |
|                  | 35.3  | 33.2  | 31.4  | 31.9  | 30.4   | 31.5  | 30.6  | 31.2   | 31.6   |
| Respiratory      | 778   | 857   | 1,084 | 1,501 | 1,993  | 279   | 957   | 2,649  | 10,098 |
|                  | 19.3  | 15.8  | 18.7  | 18.6  | 17.3   | 17.5  | 17.9  | 19.2   | 18.2   |
| Musculoskeletal  | 31    | 51    | 52    | 62    | 63     | 18    | 30    | 102    | 409    |
|                  | 0.8   | 0.9   | 0.9   | 0.8   | 0.6    | 1.1   | 0.6   | 0.7    | 0.7    |
| Skin             | 122   | 129   | 193   | 171   | 319    | 68    | 110   | 360    | 1,472  |
|                  | 3.0   | 2.4   | 3.3   | 2.1   | 2.8    | 4.3   | 2.1   | 2.6    | 2.7    |
| Nervous system   | 109   | 181   | 187   | 302   | 387    | 57    | 163   | 506    | 1,892  |
|                  | 2.7   | 3.3   | 3.2   | 3.7   | 3.4    | 3.6   | 3.0   | 3.7    | 3.4    |
| Breast           | 278   | 355   | 370   | 517   | 789    | 102   | 382   | 790    | 3,583  |
|                  | 6.9   | 6.5   | 6.4   | 6.4   | 6.8    | 6.4   | 7.1   | 5.7    | 6.4    |
| Genital (women)  | 196   | 243   | 262   | 385   | 598    | 74    | 204   | 586    | 2,548  |
|                  | 4.9   | 4.5   | 4.5   | 4.8   | 5.2    | 4.6   | 3.8   | 4.2    | 4.6    |
| Genital (men)    | 9     | 21    | 14    | 32    | 50     | 6     | 29    | 54     | 215    |
|                  | 0.2   | 0.4   | 0.2   | 0.4   | 0.4    | 0.4   | 0.5   | 0.4    | 0.4    |
| Urinary          | 247   | 397   | 389   | 566   | 918    | 103   | 461   | 962    | 4,043  |
|                  | 6.1   | 7.3   | 6.7   | 7.0   | 8.0    | 6.5   | 8.6   | 7.0    | 7.3    |
| Prostate         | 181   | 237   | 275   | 323   | 486    | 56    | 204   | 491    | 2,253  |
|                  | 4.5   | 4.4   | 4.7   | 4.0   | 4.2    | 3.5   | 3.8   | 3.6    | 4.1    |
| Haematologic     | 359   | 607   | 563   | 870   | 1,241  | 188   | 546   | 1500   | 5,874  |
|                  | 8.9   | 11.2  | 9.7   | 10.8  | 10.8   | 11.8  | 10.2  | 10.9   | 10.6   |
| Other/metastatic | 191   | 406   | 440   | 547   | 883    | 100   | 469   | 1,188  | 4,224  |
|                  | 4.7   | 7.5   | 7.6   | 6.8   | 7.7    | 6.3   | 8.8   | 8.6    | 7.6    |
| Region           | 4,028 | 5,424 | 5,811 | 8,068 | 11,530 | 1,598 | 5,357 | 13,809 | 55,625 |
|                  | 100.0 | 100.0 | 100.0 | 100.0 | 100.0  | 100.0 | 100.0 | 100.0  | 100.0  |

Table 2 - Percentage of use of anticancer drugs and palliative care (home or hospice care) during the last 30 days of life, by cancer type

| <i>Cancer type</i> | <b>Treatment during the last 30 day of life</b> |                    |                       |                             |
|--------------------|-------------------------------------------------|--------------------|-----------------------|-----------------------------|
|                    | <b>% anticancer drugs</b>                       | <b>% home care</b> | <b>% hospice care</b> | <b>% overall palliative</b> |
| Head & neck        | 13.0                                            | 19.3               | 28.7                  | 41.3                        |
| Digestive          | 10.3                                            | 23.1               | 27.7                  | 44.8                        |
| Respiratory        | 19.3                                            | 21.5               | 28.0                  | 43.3                        |
| Musculoskeletal    | 10.4                                            | 20.5               | 21.8                  | 38.1                        |
| Skin               | 16.5                                            | 25.1               | 30.9                  | 47.8                        |
| Nervous system     | 6.1                                             | 20.3               | 31.9                  | 45.2                        |
| Breast             | 27.1                                            | 20.8               | 25.5                  | 40.4                        |
| Genital (women)    | 16.4                                            | 20.8               | 29.6                  | 44.6                        |
| Genital (men)      | 13.0                                            | 15.8               | 11.2                  | 24.2                        |
| Urinary            | 8.7                                             | 19.2               | 22.9                  | 37.4                        |
| Prostate           | 26.1                                            | 18.4               | 23.2                  | 37.1                        |
| Haematologic       | 24.7                                            | 15.3               | 13.2                  | 26.2                        |
| Other/metastatic   | 8.4                                             | 18.2               | 15.8                  | 30.8                        |
| <b>Region</b>      | <b>15.3</b>                                     | <b>20.7</b>        | <b>24.9</b>           | <b>40.2</b>                 |

Table 3 – Odds ratios of receiving anticancer drugs, palliative care or both given each covariate (two-level multivariate model considering LHA clustering)

| Factor                                               | Anticancer drugs  | Palliative care   | Anticancer drugs +<br>palliative care |
|------------------------------------------------------|-------------------|-------------------|---------------------------------------|
|                                                      | OR (CI 95%)       | OR (CI 95%)       | OR (CI 95%)                           |
| Anticancer drugs within the last 30 days             | -                 | 0.90* (0.85-0.94) | -                                     |
| Palliative care within the last 30 days              | 0.92* (0.87-0.97) | -                 | -                                     |
| Haematologic tumour ( <i>ref. solid/metastatic</i> ) | 2.15* (2.00-2.30) | 0.52* (0.49-0.56) | 1.03 (0.92-1.16)                      |
| Age (continuous, in year)                            | 0.95* (0.95-0.95) | 0.99* (0.99-0.99) | 0.96*(0.96-0.96)                      |
| Hospital admission within the last 30 days           | 1.63* (1.55-1.72) | 0.70* (0.67-0.72) | 1.05 (0.98-1.14)                      |
| Surgery within the last 30 days                      | 0.59* (0.52-0.67) | 0.44* (0.39-0.49) | 0.42*(0.33-0.54)                      |
| Aggressive tumour                                    | 0.88* (0.84-0.93) | 1.12* (1.08-1.16) | 0.84*(0.78-0.90)                      |

\*significance at  $p \leq 0.05$

### Figure legends

*Figure 1 - Percentage of use of anticancer drugs during the last 30 days of life, by LHA of residence (all tumours)*

*Figure 2 - Percentage of home care services use during the last 30 days of life, by LHA of residence (all tumours)*

### Author contributions

GF: conception and design, interpretation of data, drafting the article

MM: conception and design, analysis and interpretation of data

MG: interpretation of data, revising the article critically for important intellectual content

RG: conception and design, interpretation of data, revising the article critically for important intellectual content

**Acknowledgements:** the authors want to thank Dr Alberto Bagnulo for his comments on a preliminary version

All authors approved the version to be published and agree to be accountable for all aspects of the work in ensuring that questions related to the accuracy or integrity of any part of the work are appropriately investigated and resolved

**Competing interests:** all authors declare that they do not have competing interests

**Funding statement:** this research received no specific grant from any funding agency in the public, commercial or not-for-profit sectors.

**Data sharing statement:** data will be made available upon request

**Ethics statement:** this study involves human participants and was approved by an Ethics Committee.

Name of the Ethics Committee: Comitato Etico dell'Area Vasta Emilia Nord, Reggio Emilia (Italy)

1  
2  
3  
4  
5  
6  
7  
8  
9  
10  
11  
12  
13  
14  
15  
16  
17  
18  
19  
20  
21  
22  
23  
24  
25  
26  
27  
28  
29  
30  
31  
32  
33  
34  
35  
36  
37  
38  
39  
40  
41  
42  
43  
44  
45  
46  
47  
48  
49  
50  
51  
52  
53  
54  
55  
56  
57  
58  
59  
60

Reference number for ethics approval : 1032/2020/OSS/AUSLREceived from the Ethics Committee of “Area  
Vasta Emilia Nord”

## REFERENCES

- 1  
2  
3  
4  
5  
6  
7<sup>1</sup> Specchia ML, La Torre G, Calabrò GE, Villari P, Grilli R, Federici A, et al. Disinvestment in cancer care: a survey  
8 investigating European countries' opinions and views. *Eur J Public Health* 2018;28:987-992
- 9<sup>2</sup> Blanke CD, Fromme EK. Chemotherapy Near the End of Life: First--and Third and Fourth (Line)--Do No Harm.  
10 *JAMA Oncol* 2015;1:785-6
- 11<sup>3</sup> Chan WL, Lam KO, Siu WK, Yuen KK. Chemotherapy at end-of-life: an integration of oncology and palliative  
12 team. *Support Care Cancer*. 2016;24:1421-1427
- 13<sup>4</sup> Wu CC, Hsu TW, Chang CM, et al. Palliative Chemotherapy Affects Aggressiveness of End-of-Life Care The  
14 *Oncologist* 2016;21:771-
- 15<sup>5</sup> Huynh L, Moore J. Palliative and end-of-life care for the older adult with cancer. *Curr Opin Support Palliat Care*  
16 *2021;15:23-28*
- 17<sup>6</sup> El-Jawahri A, Nelson AM, Gray TF, Lee SJ, LeBlanc TW. Palliative and End-of-Life Care for Patients With  
18 Hematologic Malignancies. *J Clin Oncol* 2020;38:944-953
- 19<sup>7</sup> [Palliative Care. World Health Organization. Available at https://www.who.int/cancer/palliative/definition/en/](https://www.who.int/cancer/palliative/definition/en/)  
20 (last accessed: Jan 19, 2022)
- 21<sup>8</sup> Ferrell BR, Temel JS, Temin S, et al. Integration of Palliative Care Into Standard Oncology Care: American  
22 Society of Clinical Oncology Clinical Practice Guideline Update. *Journal of Clinical Oncology* 2017;35:96-112
- 23<sup>9</sup> Page JP, Lederman L, Kelly J, Barry MM, and James AT Teams and Teamwork in Cancer Care Delivery: Shared  
24 Mental Models to Improve Planning for Discharge and Coordination of Follow-Up Care *Journal of Oncology*  
25 *Practice* 2016 12:11, 1053-1058
- 26<sup>10</sup> Brom, L, Onwuteaka-Philipsen, BD, Widdershoven, GA. Mechanisms that contribute to the tendency to  
27 continue chemotherapy in patients with advanced cancer. Qualitative observations in the clinical setting.  
28 *Support Care Cancer* 2016; 24:1317-1325
- 29<sup>11</sup> Hui D. Prognostication of Survival in Patients With Advanced Cancer: Predicting the Unpredictable? *Cancer*  
30 *Control*. 2015; 22:489-97
- 31<sup>12</sup> Thorne SE, Bultz BD, Baile WF, et al. Is there a cost to poor communication in cancer care?: a critical review of  
32 the literature. *Psycho-Oncology* 2005;14: 875-884
- 33<sup>13</sup> Skov Benthien K, Adersen M, Petersen MA, Soelberg Vadstrup E, Sjøgren P, Groenvold M. Is specialized  
34 palliative cancer care associated with use of antineoplastic treatment at the end of life? A population-based  
35 cohort study. *Palliative Medicine*. 2018;32:1509-1517
- 36<sup>14</sup> Clarke, G, Johnston, S, Corrie, P. Withdrawal of anticancer therapy in advanced disease: a systematic literature  
37 review. *BMC Cancer* 2015;15: 892
- 38<sup>15</sup> Sano M, Fushimi K. Association of Palliative Care Consultation With Reducing Inpatient Chemotherapy Use in  
39 Elderly Patients With Cancer in Japan: Analysis Using a Nationwide Administrative Database. *American Journal*  
40 *of Hospice and Palliative Medicine* 2017;34:685-691
- 41<sup>16</sup> Harrington SE, Smith TJ. The role of chemotherapy at the end of life: "when is enough, enough?". *JAMA*.  
42 *2008;299:2667-78*.
- 43<sup>17</sup> Wright AA, Zhang B, Keating NL, Weeks JC, Prigerson HG. Associations between palliative chemotherapy and  
44 adult cancer patients' end of life care and place of death: prospective cohort study. *BMJ* 348: g1219
- 45<sup>18</sup> Neugut AI, Prigerson HG. Curative, Life-Extending, and Palliative Chemotherapy: New Outcomes Need New  
46 Names. *Oncologist*. 2017;22:883-5
- 47<sup>19</sup> Pacetti P, Paganini G, Orlandi M, Mambrini A, Pennucci MC, Del Freato A, et al. Chemotherapy in the last 30 days  
48 of life of advanced cancer patients. *Support Care Cancer*. 2015;23:3277-3280
- 49<sup>20</sup> Smith CB, Phillips T, Smith TJ. Using the New ASCO Clinical Practice Guideline for Palliative Care Concurrent  
50 With Oncology Care Using the TEAM Approach. DOI: 10.1200/EDBK\_175474 *American Society of Clinical*  
51 *Oncology Educational Book* 37 (October 29, 2018) 714-723.
- 52<sup>21</sup> Nappa U, Lindqvist O, Rasmussen BH, Axelsson B. Palliative chemotherapy during the last month of life. *Ann*  
53 *Oncol* 2011; 11: 2375-2380
- 54  
55  
56  
57  
58  
59  
60

- 1  
2  
3
- 
- 4 22 Cardona-Morrell M, Kim JCH, Turner RM, Anstey M, Mitchell IA, Hillman K. Non-beneficial treatments in  
5 hospital at the end of life: a systematic review on extent of the problem. *International Journal for Quality in*  
6 *Health Care* 2016;28:456–469
- 7 23 Rochigneux P, Raoul JL, Beaussant Y, Aubry R, Goldwasser F, Tournigand C, Morin L. Use of chemotherapy near  
8 the end of life: what factors matter. *Annals of Oncology* 2017;28:809–817
- 9 24 Prigerson HG, Bao Y, Shah MA, Paulk ME, LeBlanc TW, et al. Chemotherapy Use, Performance Status, and  
10 Quality of Life at the End of Life. *JAMA Oncol* 2015;1:778-784
- 11 25 Massa I et al. Chemotherapy and palliative care near end-of life: examining the appropriateness at a cancer  
12 institute for colorectal cancer patients. *BMC Palliative Care* (2018) 17:86
- 13 26 Pellizzari M, Rolfini M, Ferroni E, Savioli V, Gennaro N, Schievano E, et al. Intensity of integrated cancer  
14 palliative care plans and end-of-life acute medical hospitalisation among cancer patient in Northern Italy. *Eur J*  
15 *Cancer Care* 2018;27:e12742
- 16 27 Goldstein H. (2003). *Multilevel Statistical Models*. 3rd ed. London, UK: Arnold
- 17 28 Hosmer, D. W. and Lemeshow, S. (2000). *Applied Logistic Regression*. New York, NY: John Wiley & Sons, Inc.,  
18 DOI: <https://doi.org/10.1002/0471722146>
- 19 29 Pulte D, Jansen L, Brenner H. Changes in long term survival after diagnosis with common hematologic  
20 malignancies in the early 21st century. *Blood Cancer Journal* 2020;10: Article number 56
- 21 30 Van Metre Baum L, Roseblum R, Scarborough B, Smith CB. Evaluating end-of-life chemotherapy for solid  
22 tumor and hematologic malignancy patients. *Progress in palliative care* 2021.  
23 <https://doi.org/10.1080/09699260.2021.1872138> <https://doi.org/10.1080/09699260.2021.1872138>
- 24 31 Hui D, Didwaniya N, Vidal M, et al. Quality of End-of-Life Care in Patients with Hematologic Malignancies: A  
25 Retrospective Cohort Study. *Cancer* 2014;120:1572–1578.
- 26 32 Odejide OO, Salas Coronado DY, Watts CD, et al. End-of-Life Care for Blood Cancers: A Series of Focus Groups  
27 With Hematologic Oncologists. *J Oncol Pract* 2014;10:e396–e403
- 28 33 Rodriguez MA, DeJesus AY, Cheng L. Use of Chemotherapy Within the Last 14 Days of Life in Patients Treated  
29 at a Comprehensive Cancer Center. *JAMA Intern Med* 2014;174:989-991
- 30 34 Legge 15 marzo 2010 , n. 38. G.U. Serie Generale , n. 65 del 19 marzo 2010
- 31 35 Regione Emilia-Romagna, Assessorato politiche per la salute. Indagine sullo stato di attuazione degli hospice  
32 nella rete di cure palliative dell'Emilia-Romagna anno 2013. [http://salute.regione.emilia-](http://salute.regione.emilia-romagna.it/siseps/sanita/sdhs/files/AO_1_3_All_PG_91336_2015.pdf/view)  
33 [romagna.it/siseps/sanita/sdhs/files/AO\\_1\\_3\\_All\\_PG\\_91336\\_2015.pdf/view](http://salute.regione.emilia-romagna.it/siseps/sanita/sdhs/files/AO_1_3_All_PG_91336_2015.pdf/view) (last accessed: Sept 15, 2021)
- 34 36 Gyawali B, Phillips Hey S, Kesselheim AS. Assessment of the Clinical Benefit of Cancer Drugs Receiving  
35 Accelerated Approval. *JAMA Intern Med.* 2019;179:906-913
- 36 37 Simmonds PC. Palliative chemotherapy for advanced colorectal cancer: systematic review and meta-analysis.  
38 *Colorectal Cancer Collaborative Group. BMJ* 2000;321:531-5
- 39 38 Bezjak A, Tu D, Seymour L, Clark G, Trajkovic A, Zukin M, et al. Symptom improvement in lung cancer patients  
40 treated with erlotinib: quality of life analysis of the National Cancer Institute of Canada Clinical Trials Group  
41 Study BR.21. *J Clin Oncol* 2006;24:3831-7
- 42 39 Oostendorp LJ, Stalmeier PF, Donders AR, van der Graaf WT, Ottevanger PB. Efficacy and safety of palliative  
43 chemotherapy for patients with advanced breast cancer pretreated with anthracyclines and taxanes: a  
44 systematic review. *Lancet Oncol* 2011;12:1053-61.
- 45 40 Gourgou-Bourgade S, Bascoul-Mollevi C, Desseigne F, Ychou M, Bouché O, Guimbaud R, et al. Impact of  
46 FOLFIRINOX compared with gemcitabine on quality of life in patients with metastatic pancreatic cancer: results  
47 from the PRODIGE 4/ACCORD 11 randomized trial. *J Clin Oncol* 2013;31:23-9
- 48 41 Janmaat VT, Steyerberg EW, van der Gaast A, Mathijssen RHJ, Bruno MJ, Peppelenbosch MP, et al. Palliative  
49 chemotherapy and targeted therapies for esophageal and gastroesophageal junction cancer. *Cochrane Database of*  
50 *Systematic Reviews* 2017, Issue 11. Art. No.: CD004063. DOI: 10.1002/14651858.CD004063.pub4
- 51  
52  
53  
54  
55  
56  
57  
58  
59  
60



- 1  
2  
3
- 
- 4<sup>42</sup> van Kleef JJ, Ter Veer E, van den Boorn HG, Schokker S, Ngai LL, Prins MJ, et al. Quality of Life During Palliative  
5 Systemic Therapy for Esophagogastric Cancer: Systematic Review and Meta-Analysis. *J Natl Cancer Inst*  
6 2020;112:12-29
- 7  
8
- 9<sup>43</sup> Crawford GB, Dzierżanowski T, Hauser K, Larkin P, Luque-Blanco AI, Murphy I, et al. Care of the adult cancer  
10 patient at the end of life: ESMO Clinical Practice Guidelines. *ESMO Open* 2021;6:100225
- 11
- 12<sup>44</sup> Jang RW, Carascos VB, Swami N, Banerjee S, Mak E, Kaya E, et al. Simple Prognostic Model for Patients With  
13 Advanced Cancer Based on Performance Status. *Journal of Oncology Practice* 2014;10:e335-e341
- 14<sup>45</sup> Johansen J, Boisen MK, Mellempgaard A, Holm B. Prognostic value of ECOG performance status in lung cancer  
15 assessed by patients and physicians. *Journal of Clinical Oncology* 2013 31:15\_suppl, 8103-8103
- 16<sup>46</sup> Maltoni M, Caraceni A, Brunelli C, et al: Prognostic factors in advanced cancer patients: evidence-based clinical  
17 recommendations—a study by the Steering Committee of the European Association for Palliative Care. *J Clin*  
18 *Oncol* 2005;23:6240-6248
- 19
- 20<sup>47</sup> Simmons CPL, McMillan DC, McWilliams K, Sande TA, Fearon KC, Tuck S, et al. Prognostic Tools in Patients  
21 With Advanced Cancer: A Systematic Review. *J Pain Symptom Manage* 2017;53:962-970
- 22<sup>48</sup> Maltoni M, Nanni O, Pirovano M, Scarpi E, Indelli M, Martini C, et al. Successful Validation of the Palliative  
23 Prognostic Score in Terminally Ill Cancer Patient. *Journal of Pain and Symptom Management* 1999;17:240-7
- 24<sup>49</sup> Tarumi Y, Watanabe SM, Lau F, Yang J, Quan H, Sawchuk L, et al. Evaluation of the Palliative Prognostic Score  
25 (PaP) and Routinely Collected Clinical Data in Prognostication of Survival for Patients Referred to a Palliative  
26 Care Consultation Service in an Acute Care Hospital. *J Pain Symptom Manage* 2011;42:419e431
- 27
- 28<sup>50</sup> Glare PA, Eychmueller S, McMahan P. Diagnostic Accuracy of the Palliative Prognostic Score in Hospitalized  
29 Patients With Advanced Cancer. *Journal of Clinical Oncology* 2004;22:4823-8
- 30<sup>51</sup> Hui D, Park M, Liu D, Paiva CE, Suh SY, Morita T, Bruera E. Clinician prediction of survival versus the Palliative  
31 Prognostic Score: Which approach is more accurate? *European Journal of Cancer* 2016;64:89-95
- 32<sup>52</sup> Back AL, Anderson WG, Bunch L, Marr LA, Wallace JA, Yang HB, Arnold RM. Communication about cancer near  
33 the end of life. *Cancer* 2008;113(7 Suppl):1897-1910
- 34
- 35<sup>53</sup> Rietjens JAC, Sudore RL, Connolly M, van Delden JJ, Drickamer MA, Droger M, et al. Definition and  
36 recommendations for advance care planning: an international consensus supported by the European  
37 Association for Palliative Care. *Lancet Oncol.* 2017;18:e543-51. 10.1016/S1470-2045(17)30582-X
- 38<sup>54</sup> Starr, Lauren T et al. "Associations Among End-of-Life Discussions, Health-Care Utilization, and Costs in Persons  
39 With Advanced Cancer: A Systematic Review." *The American journal of hospice & palliative care* vol. 36,10  
40 (2019): 913-926.
- 41<sup>55</sup> IOM IoM. *Dying in America: Improving Quality and Honoring Individual Preferences Near the End of*  
42 *Life* Washington, DC: IOM; 2015. March 19 2015
- 43
- 44<sup>56</sup> Schulman-Green D, Smith CB, Lin JJ, Feder S, Bickell NA. Oncologists' and patients' perceptions of initial,  
45 intermediate, and final goals of care conversations. *J Pain Symptom Manage* 2018;55:890-6
- 46<sup>57</sup> O'Connor NR, Junker P, Appel SM, Stetson RL, Rohrbach J, Meghani SH. Palliative Care Consultation for Goals  
47 of Care and Future Acute Care Costs: A Propensity-Matched Study. *Am J Hosp Palliat Care.*  
48 2017:1049909117743475
- 49<sup>58</sup> Banerjee, S. C., Manna, R., Coyle, N., Shen, M. J., Pehrson, C., Zaider, T., Hammonds, S., Krueger, C. A., Parker,  
50 P. A., & Bylund, C. L. (2016). Oncology nurses' communication challenges with patients and families: A  
51 qualitative study. *Nurse education in practice*, 16(1), 193-201.
- 52<sup>59</sup> Baer L, Weinstein E. Improving oncology nurses' communication skills for difficult conversations. *Clin J Oncol*  
53 *Nurs.* 2013;17:E45-E51
- 54
- 55<sup>60</sup> Hack TF, Ruether JD, Pickles T, et al. Behind closed doors II: systematic analysis of prostate cancer patients'  
56 primary treatment consultations with radiation oncologists and predictors of satisfaction with  
57 communication. *Psycho-Oncology.* 2012;21:809-817
- 58<sup>61</sup> Simpson N, Milnes S, Martin P, et al. Validate: a communication-based clinical intervention in life-limiting  
59 illness *BMJ Supportive & Palliative Care* Published Online First: 11 April 2019. doi: 10.1136/bmjspcare-2018-  
60 001669

1  
2  
3  
4  
5  
6  
7  
8  
9  
10  
11  
12  
13  
14  
15  
16  
17  
18  
19  
20  
21  
22  
23  
24  
25  
26  
27  
28  
29  
30  
31  
32  
33  
34  
35  
36  
37  
38  
39  
40  
41  
42  
43  
44  
45  
46  
47  
48  
49  
50  
51  
52  
53  
54  
55  
56  
57  
58  
59  
60

---

62 Walczak A, Butow PN, Bu S, MClayton JM. A systematic review of evidence for end-of-life communication interventions: Who do they target, how are they structured and do they work? *Patient Education and Counseling* 2016;99:3-16

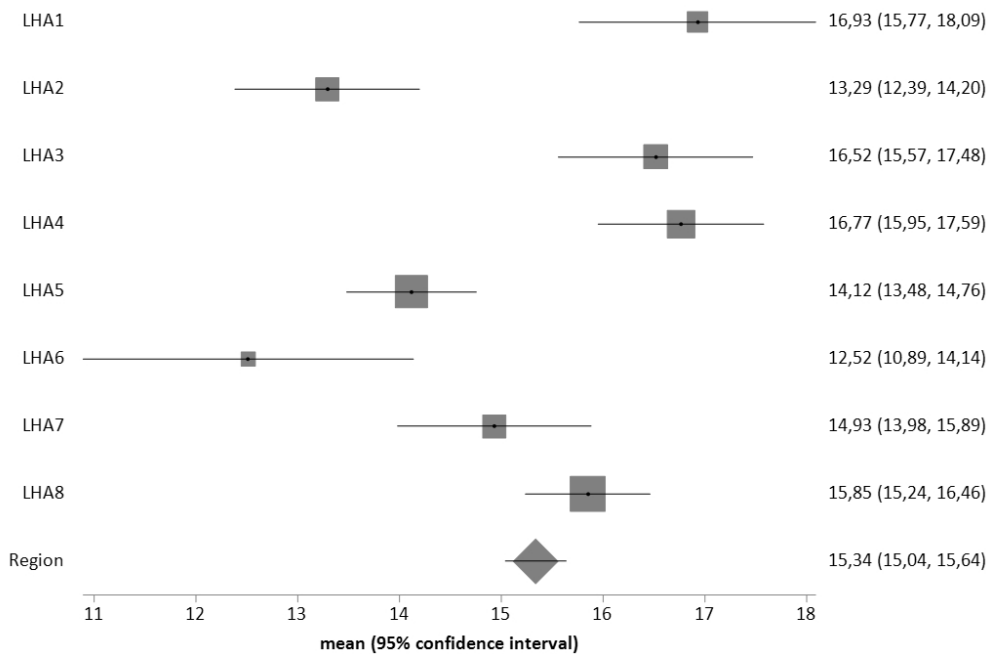

Figure 1 - Percentage of anticancer drug use during the last 30 days of life, by LHA of residence (all tumours)

86x57mm (300 x 300 DPI)

1  
2  
3  
4  
5  
6  
7  
8  
9  
10  
11  
12  
13  
14  
15  
16  
17  
18  
19  
20  
21  
22  
23  
24  
25  
26  
27  
28  
29  
30  
31  
32  
33  
34  
35  
36  
37  
38  
39  
40  
41  
42  
43  
44  
45  
46  
47  
48  
49  
50  
51  
52  
53  
54  
55  
56  
57  
58  
59  
60

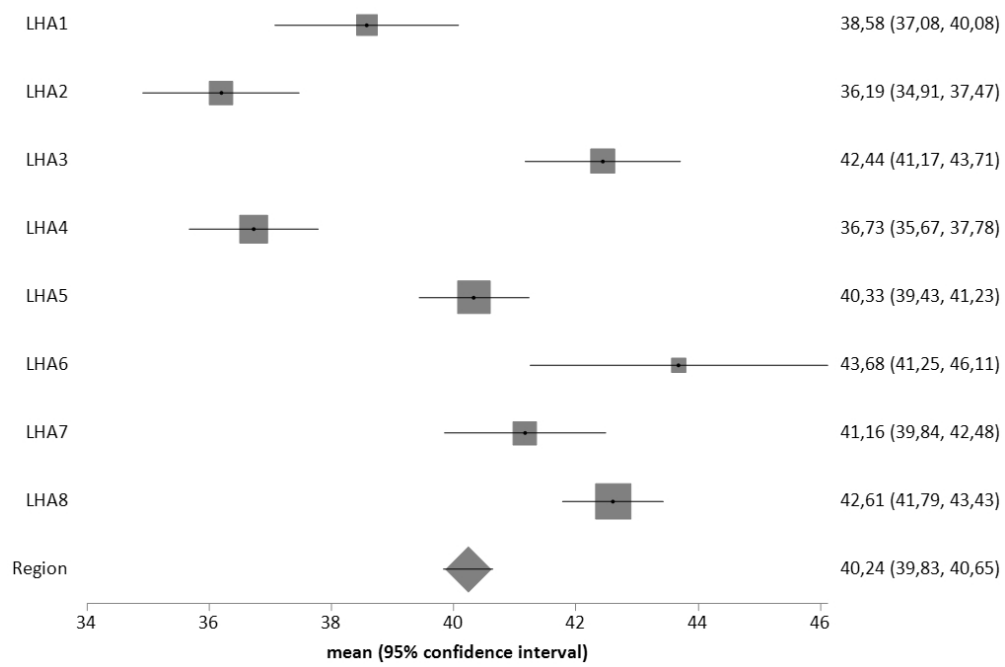

Figure 2 - Percentage of home care services use during the last 30 days of life, by LHA of residence (all tumours)

85x58mm (300 x 300 DPI)

Extra table - Odds ratios of receiving anticancer drugs, palliative care or both given each covariate (logistic multivariate model without LHA clustering)

| Factor                                                       | Anticancer drugs | Palliative care  | Anticancer drugs + palliative care |
|--------------------------------------------------------------|------------------|------------------|------------------------------------|
|                                                              | OR (CI 95%)      | OR (CI 95%)      | OR (CI 95%)                        |
| Anticancer drugs within the last 30 days ( <i>ref.NO</i> )   | -                | 0.90*(0.85-0.94) | -                                  |
| Palliative care within the last 30 days ( <i>ref.NO</i> )    | 0.92*(0.87-0.97) | -                | -                                  |
| Haematologic tumour ( <i>ref. solid/metastatic</i> )         | 2.15*(2.01-2.30) | 0.52*(0.49-0.56) | 1.03 (0.92-1.17)                   |
| Age (continuous, in year)                                    | 0.95*(0.95-0.95) | 0.99*(0.99-0.99) | 0.96*(0.96-0.96)                   |
| Hospital admission within the last 30 days ( <i>ref.NO</i> ) | 1.63*(1.55-1.72) | 0.70*(0.67-0.72) | 1.05 (0.98-1.14)                   |
| Surgery within the last 30 days ( <i>ref.NO</i> )            | 0.59*(0.52-0.68) | 0.44*(0.39-0.49) | 0.42*(0.33-0.54)                   |
| Aggressive tumour ( <i>ref.NO</i> )                          | 0.88*(0.84-0.92) | 1.12*(1.08-1.16) | 0.84*(0.78-0.90)                   |
| LHA 3 ( <i>reference</i> )                                   |                  |                  |                                    |
| LHA 1                                                        | 1.09 (0.97-1.22) | 0.86*(0.79-0.93) | 1.03 (0.87-1.21)                   |
| LHA 2                                                        | 0.79*(0.71-0.89) | 0.77*(0.72-0.84) | 0.69*(0.58-0.81)                   |
| LHA 3                                                        | 1.04 (0.94-1.14) | 0.80*(0.74-0.85) | 0.91 (0.79-1.05)                   |
| LHA 4                                                        | 0.91*(0.84-1.00) | 0.92*(0.86-0.98) | 0.84*(0.73-0.96)                   |
| LHA 5                                                        | 0.75*(0.63-0.89) | 1.07 (0.96-1.20) | 0.76*(0.59-0.98)                   |
| LHA 6                                                        | 0.92 (0.83-1.02) | 0.96 (0.89-1.04) | 0.89 (0.76-1.04)                   |
| LHA 7                                                        | 0.99 (0.90-1.07) | 1.04 (0.97-1.10) | 1.03 (0.91-1.17)                   |

\* significance at  $p \leq 0.05$ ; LHA = local health authority

## APPENDIX. Relevant codes for cohort selection and use of health services

### Cohort selection:

from mortality registry, deceased subjects with cancer as underlying cause of death (ICD X: C00-C97; D00-D09; D37-D48)

### Anticancer drugs from hospital records and ambulatory care:

- Hospital records: ICD 9-CM pathology code V58.1x and/or\*/ICD9 CM intervention code =99.25 and/or DRG code 410
- ambulatory care: administrative codes (from tariff nomenclator) 99.25, 992501, 8901F0

### Anticancer drugs for outpatients:

ATC code L01 or L02

### ICD-9 codes for aggressive tumours

150.x malignant tumor of the esophagus  
151.x malignant tumor of the stomach  
155.x malignant tumor of the liver and intrahepatic bile ducts  
156.x malignant tumor of the gallbladder and extrahepatic ducts  
157.x malignant tumor of the pancreas  
162.x Malignant tumor of the trachea, bronchi and lungs  
163.x malignant tumor of the pleura  
179.x malignant tumor of the uterus  
191.x malignant brain tumor  
192.0 malignant tumor of the cranial nerves  
192.1 malignant tumor of the brain meninges  
202.4 leukemic reticuloendotheliosis  
204.x lymphoid leukemia  
205.x acute myeloid leukemia  
206.x monocytic leukemia  
207.x other specific leukemias  
208.x unspecified cell-type leukemia

### ICD-9 codes for metastases

196.xx-199.xx

### ICD-X codes for haematologic tumors

C81 Hodgkin's disease  
C82 Follicular (nodular) non-Hodgkin's lymphoma  
C83 Diffuse non-Hodgkin's lymphoma  
C84 Peripheral and cutaneous T-cell lymphoma

1  
2  
3 C85 Other and unspecified types of non-Hodgkin's lymphoma  
4 C88 Immunoproliferative malignant diseases  
5 C90 Multiple myeloma and malignant plasma cell tumors  
6 C91 Lymphoid leukemia  
7 C92 Myeloid leukemia  
8 C93 Monocytic leukemia  
9 C94 Other specified cell type leukemias  
10 C95 Unspecified cell type leukemia  
11 C96 Other and unspecified malignant tumor of lymphoid, hematopoietic and related tissues  
12 D45 Polycythemia vera  
13 D46 Myelodysplastic syndromes  
14 D47 Other tumors of uncertain or unknown behavior of lymphatic, hematopoietic and tissues  
15  
16  
17  
18  
19  
20  
21  
22  
23  
24  
25  
26  
27  
28  
29  
30  
31  
32  
33  
34  
35  
36  
37  
38  
39  
40  
41  
42  
43  
44  
45  
46  
47  
48  
49  
50  
51  
52  
53  
54  
55  
56  
57  
58  
59  
60

For peer review only

STROBE Statement—Checklist of items that should be included in reports of *cohort studies*

|                              | Item No | Recommendation                                                                                                                                                                                                                                                                                                                                                                                                                                                                                            |
|------------------------------|---------|-----------------------------------------------------------------------------------------------------------------------------------------------------------------------------------------------------------------------------------------------------------------------------------------------------------------------------------------------------------------------------------------------------------------------------------------------------------------------------------------------------------|
| <b>Title and abstract</b>    | 1       | (a) Indicate the study's design with a commonly used term in the title or the abstract<br><b>(Pag. 1-2)</b><br>(b) Provide in the abstract an informative and balanced summary of what was done and what was found<br><b>(Pag. 2)</b>                                                                                                                                                                                                                                                                     |
| <b>Introduction</b>          |         |                                                                                                                                                                                                                                                                                                                                                                                                                                                                                                           |
| Background/rationale         | 2       | Explain the scientific background and rationale for the investigation being reported<br><b>(Pag. 5-6)</b>                                                                                                                                                                                                                                                                                                                                                                                                 |
| Objectives                   | 3       | State specific objectives, including any prespecified hypotheses<br><b>(pag. 6)</b>                                                                                                                                                                                                                                                                                                                                                                                                                       |
| <b>Methods</b>               |         |                                                                                                                                                                                                                                                                                                                                                                                                                                                                                                           |
| Study design                 | 4       | Present key elements of study design early in the paper<br><b>(pag. 6)</b>                                                                                                                                                                                                                                                                                                                                                                                                                                |
| Setting                      | 5       | Describe the setting, locations, and relevant dates, including periods of recruitment, exposure, follow-up, and data collection<br><b>(pag. 6)</b>                                                                                                                                                                                                                                                                                                                                                        |
| Participants                 | 6       | (a) Give the eligibility criteria, and the sources and methods of selection of participants. Describe methods of follow-up<br><b>(pag. 6)</b><br>(b) For matched studies, give matching criteria and number of exposed and unexposed                                                                                                                                                                                                                                                                      |
| Variables                    | 7       | Clearly define all outcomes, exposures, predictors, potential confounders, and effect modifiers. Give diagnostic criteria, if applicable<br><b>(pag. 6-7, appendix)</b>                                                                                                                                                                                                                                                                                                                                   |
| Data sources/<br>measurement | 8*      | For each variable of interest, give sources of data and details of methods of assessment (measurement). Describe comparability of assessment methods if there is more than one group<br><b>(pag. 6-7, appendix)</b>                                                                                                                                                                                                                                                                                       |
| Bias                         | 9       | Describe any efforts to address potential sources of bias<br><b>(pag. 7, appendix for multivariate statistical models)</b>                                                                                                                                                                                                                                                                                                                                                                                |
| Study size                   | 10      | Explain how the study size was arrived at<br><b>We considered all deceased subjects in a four-year period (pag. 6). No formal hypothesis was pre-specified</b>                                                                                                                                                                                                                                                                                                                                            |
| Quantitative variables       | 11      | Explain how quantitative variables were handled in the analyses. If applicable, describe which groupings were chosen and why<br><b>(pag. 6-7, appendix)</b>                                                                                                                                                                                                                                                                                                                                               |
| Statistical methods          | 12      | (a) Describe all statistical methods, including those used to control for confounding<br><b>(pag. 7)</b><br>(b) Describe any methods used to examine subgroups and interactions<br><b>(pag. 7)</b><br>(c) Explain how missing data were addressed<br><b>(we commented on completeness of data at pag. 10)</b><br>(d) If applicable, explain how loss to follow-up was addressed<br><b>(not applicable)</b><br>(e) Describe any sensitivity analyses<br><b>(pag. 7 – LHA clustering vs not clustering)</b> |



1  
2  
3  
4  
5  
6  
7  
8  
9  
10  
11  
12  
13  
14  
15  
16  
17  
18  
19  
20  
21  
22  
23  
24  
25  
26  
27  
28  
29  
30  
31  
32  
33  
34  
35  
36  
37  
38  
39  
40  
41  
42  
43  
44  
45  
46  
47  
48  
49  
50  
51  
52  
53  
54  
55  
56  
57  
58  
59  
60

| <b>Results</b>           |     |                                                                                                                                                                                                                                                                                                                                                                                                                                                                                                                                                                                                          |
|--------------------------|-----|----------------------------------------------------------------------------------------------------------------------------------------------------------------------------------------------------------------------------------------------------------------------------------------------------------------------------------------------------------------------------------------------------------------------------------------------------------------------------------------------------------------------------------------------------------------------------------------------------------|
| Participants             | 13* | (a) Report numbers of individuals at each stage of study—eg numbers potentially eligible, examined for eligibility, confirmed eligible, included in the study, completing follow-up, and analysed<br><b>Pag. 6-7 and table 1 (included all deceased subjects – cancer as underlying cause of death)</b><br>(b) Give reasons for non-participation at each stage<br><b>(not applicable)</b><br>(c) Consider use of a flow diagram<br><b>(not applicable)</b>                                                                                                                                              |
| Descriptive data         | 14* | (a) Give characteristics of study participants (eg demographic, clinical, social) and information on exposures and potential confounders<br><b>(pag. 7 – see covariates of the statistical models, table 3 and table in appendix)</b><br>(b) Indicate number of participants with missing data for each variable of interest<br><b>(55,625 subjects were included - pag. 7)</b><br>(c) Summarise follow-up time (eg, average and total amount)<br><b>(exposures were assessed in the last 30 days of life)</b>                                                                                           |
| Outcome data             | 15* | Report numbers of outcome events or summary measures over time<br><b>(% use of anticancer drugs and palliative care during the last 30 days of life has been reported by cancer type – see tab. 2)</b>                                                                                                                                                                                                                                                                                                                                                                                                   |
| Main results             | 16  | (a) Give unadjusted estimates and, if applicable, confounder-adjusted estimates and their precision (eg, 95% confidence intervals). Make clear which confounders were adjusted for and why they were included<br><b>We provided results from multivariate analyses (OR and confidence intervals - – see pag. 7-8, tab 3a and table in the appendix)</b><br>(b) Report category boundaries when continuous variables were categorized<br><b>Not applicable</b><br>(c) If relevant, consider translating estimates of relative risk into absolute risk for a meaningful time period<br><b>Not relevant</b> |
| Other analyses           | 17  | Report other analyses done—eg analyses of subgroups and interactions, and sensitivity analyses<br><b>See table in appendix</b>                                                                                                                                                                                                                                                                                                                                                                                                                                                                           |
| <b>Discussion</b>        |     |                                                                                                                                                                                                                                                                                                                                                                                                                                                                                                                                                                                                          |
| Key results              | 18  | Summarise key results with reference to study objectives<br><b>(pag. 9)</b>                                                                                                                                                                                                                                                                                                                                                                                                                                                                                                                              |
| Limitations              | 19  | Discuss limitations of the study, taking into account sources of potential bias or imprecision. Discuss both direction and magnitude of any potential bias<br><b>(pag. 10)</b>                                                                                                                                                                                                                                                                                                                                                                                                                           |
| Interpretation           | 20  | Give a cautious overall interpretation of results considering objectives, limitations, multiplicity of analyses, results from similar studies, and other relevant evidence<br><b>(pag. 9-11)</b>                                                                                                                                                                                                                                                                                                                                                                                                         |
| Generalisability         | 21  | Discuss the generalisability (external validity) of the study results<br><b>(pag. 10)</b>                                                                                                                                                                                                                                                                                                                                                                                                                                                                                                                |
| <b>Other information</b> |     |                                                                                                                                                                                                                                                                                                                                                                                                                                                                                                                                                                                                          |
| Funding                  | 22  | Give the source of funding and the role of the funders for the present study and, if applicable, for the original study on which the present article is based<br><b>(not applicable – authors work within the Italian NHS and this research was</b>                                                                                                                                                                                                                                                                                                                                                      |

---

**within the scope of their job)**

---

\*Give information separately for exposed and unexposed groups.

**Note:** An Explanation and Elaboration article discusses each checklist item and gives methodological background and published examples of transparent reporting. The STROBE checklist is best used in conjunction with this article (freely available on the Web sites of PLoS Medicine at <http://www.plosmedicine.org/>, Annals of Internal Medicine at <http://www.annals.org/>, and Epidemiology at <http://www.epidem.com/>). Information on the STROBE Initiative is available at <http://www.strobe-statement.org>.

For peer review only

# BMJ Open

## End of life care in cancer patients: how much drug therapy and how much palliative care? Record linkage study in Northern Italy

|                                 |                                                                                                                                                                                                                                                                                                                                                                                                                                                                                                                                                       |
|---------------------------------|-------------------------------------------------------------------------------------------------------------------------------------------------------------------------------------------------------------------------------------------------------------------------------------------------------------------------------------------------------------------------------------------------------------------------------------------------------------------------------------------------------------------------------------------------------|
| Journal:                        | <i>BMJ Open</i>                                                                                                                                                                                                                                                                                                                                                                                                                                                                                                                                       |
| Manuscript ID                   | bmjopen-2021-057437.R2                                                                                                                                                                                                                                                                                                                                                                                                                                                                                                                                |
| Article Type:                   | Original research                                                                                                                                                                                                                                                                                                                                                                                                                                                                                                                                     |
| Date Submitted by the Author:   | 08-Mar-2022                                                                                                                                                                                                                                                                                                                                                                                                                                                                                                                                           |
| Complete List of Authors:       | Formoso, Giulio; Reggio Emilia Local Agency - IRCCS Advanced Technologies and Care Models in Oncology, Clinical Governance Unit Marino, Massimiliano; Reggio Emilia Local Agency - IRCCS Advanced Technologies and Care Models in Oncology, Clinical Governance Unit Guberti, Monica; Reggio Emilia Local Agency - IRCCS Advanced Technologies and Care Models in Oncology, Department of Health Professions Grilli, Roberto Giuseppe; Reggio Emilia Local Agency - IRCCS Advanced Technologies and Care Models in Oncology, Clinical Governance Unit |
| <b>Primary Subject Heading</b>: | Oncology                                                                                                                                                                                                                                                                                                                                                                                                                                                                                                                                              |
| Secondary Subject Heading:      | Epidemiology, Health services research, Palliative care, Public health                                                                                                                                                                                                                                                                                                                                                                                                                                                                                |
| Keywords:                       | CHEMOTHERAPY, ONCOLOGY, PALLIATIVE CARE                                                                                                                                                                                                                                                                                                                                                                                                                                                                                                               |
|                                 |                                                                                                                                                                                                                                                                                                                                                                                                                                                                                                                                                       |

SCHOLARONE™  
Manuscripts



I, the Submitting Author has the right to grant and does grant on behalf of all authors of the Work (as defined in the below author licence), an exclusive licence and/or a non-exclusive licence for contributions from authors who are: i) UK Crown employees; ii) where BMJ has agreed a CC-BY licence shall apply, and/or iii) in accordance with the terms applicable for US Federal Government officers or employees acting as part of their official duties; on a worldwide, perpetual, irrevocable, royalty-free basis to BMJ Publishing Group Ltd ("BMJ") its licensees and where the relevant Journal is co-owned by BMJ to the co-owners of the Journal, to publish the Work in this journal and any other BMJ products and to exploit all rights, as set out in our [licence](#).

The Submitting Author accepts and understands that any supply made under these terms is made by BMJ to the Submitting Author unless you are acting as an employee on behalf of your employer or a postgraduate student of an affiliated institution which is paying any applicable article publishing charge ("APC") for Open Access articles. Where the Submitting Author wishes to make the Work available on an Open Access basis (and intends to pay the relevant APC), the terms of reuse of such Open Access shall be governed by a Creative Commons licence – details of these licences and which [Creative Commons](#) licence will apply to this Work are set out in our licence referred to above.

Other than as permitted in any relevant BMJ Author's Self Archiving Policies, I confirm this Work has not been accepted for publication elsewhere, is not being considered for publication elsewhere and does not duplicate material already published. I confirm all authors consent to publication of this Work and authorise the granting of this licence.

1  
2  
3 **End of life care in cancer patients: how much drug therapy and how much palliative care? Record linkage**  
4  
5 **study in Northern Italy**  
6  
7

8 Giulio Formoso <sup>a</sup> ([giulio.formoso@ausl.re.it](mailto:giulio.formoso@ausl.re.it))  
9

10  
11 Massimiliano Marino <sup>a</sup> ([massimiliano.marino@ausl.re.it](mailto:massimiliano.marino@ausl.re.it))  
12

13  
14 Monica Guberti <sup>b</sup> ([monica.guberti@ausl.re.it](mailto:monica.guberti@ausl.re.it))  
15

16  
17 Roberto Giuseppe Grilli <sup>a</sup> ([robertogiuseppe.grilli@ausl.re.it](mailto:robertogiuseppe.grilli@ausl.re.it))  
18  
19  
20  
21  
22

23  
24 a. Reggio Emilia Local Agency - IRCCS Advanced Technologies and Care Models in Oncology, Clinical  
25  
26 Governance Unit, Reggio Emilia, Emilia-Romagna, IT  
27

28  
29 b. Reggio Emilia Local Agency - IRCCS Advanced Technologies and Care Models in Oncology (Italy), Department  
30  
31 of Health Professions, Reggio Emilia, Emilia-Romagna, IT  
32  
33  
34  
35  
36

37 **Corresponding author:** Giulio Formoso  
38

39 Via Amendola 2; 42122 Reggio Emilia (Italy)  
40

41  
42 E-mail: [giulio.formoso@ausl.re.it](mailto:giulio.formoso@ausl.re.it)  
43  
44  
45

46 **Participant consent:** not required (the study cohort was made up of deceased patients).  
47

48 The "Area Vasta Emilia Nord" Ethics Committee waived the need for next of kins' consent  
49  
50  
51  
52  
53  
54  
55  
56  
57  
58  
59  
60

1  
2  
3 **Abstract** (word count: 300 words)  
4

5 **Objectives**  
6

7 Investigating end-of-life use of anticancer drugs and of palliative care services.  
8  
9

10 **Design**  
11

12 Population based cohort linked to mortality registry and administrative databases.  
13

14 **Setting**  
15

16 Emilia-Romagna Region (Northern Italy).  
17  
18

19 **Participants**  
20

21 55,625 residents who died of cancer between 2017-2020.  
22

23 **Primary and secondary outcome measures**  
24

25 Multivariate analyses were carried out to assess the relationship between cancer drug therapy and palliative  
26 care services, and their association with factors related to tumour severity.  
27  
28

29 **Results**  
30

31  
32 In the last month of life, 15.3% of study population received anticancer drugs (from 12.5% to 16.9% across the  
33 eight local health authorities - LHA) and 40.2% received palliative care services (from 36.2% to 43.7%). Drug  
34 therapy was inversely associated with receiving palliative care services within the last 30 days (odds ratio 0.92,  
35 95% CI 0.87-0.97), surgery within the last 6 months (OR 0.59, 95% CI 0.52-0.67), aggressive tumours (OR 0.88,  
36 95% CI 0.84-0.93) and increasing age (OR 0.95, 95% CI 0.95-0.95). Drug therapy was more likely among those  
37 with haematologic tumours (OR 2.15, 95% CI 2.00-2.30) and in case of hospital admissions within the last 6  
38 months (OR 1.63, 95% CI 1.55-1.72). Palliative care was less likely among those with haematologic compared  
39 with other tumours (OR 0.52, 95% CI 0.49-0.56), in case of surgery (OR 0.44, 95% CI 0.39-0.49) or hospital  
40 admissions (OR 0.70, 95% CI 0.67-0.72) within the last 6 months, if receiving anticancer drugs during the last 30  
41 days (OR 0.90, 95% CI 0.85-0.94) and for each year of increasing age (OR 0.99, 95% CI 0.99-0.99). Palliative care  
42 was more likely in presence of aggressive tumours (OR 1.12, 95% CI 1.08-1.16).  
43  
44  
45  
46  
47  
48  
49  
50  
51  
52  
53  
54  
55

56 **Conclusion**  
57  
58  
59  
60

1  
2  
3 Use of anticancer drugs and palliative care in the last month of life were inversely associated, showing variability  
4  
5 across different LHAs. While administrative data have limits, our findings are in line with conclusions of other  
6  
7 studies.  
8  
9  
10  
11  
12  
13  
14  
15  
16  
17  
18  
19  
20  
21  
22  
23  
24  
25  
26  
27  
28  
29  
30  
31  
32  
33  
34  
35  
36  
37  
38  
39  
40  
41  
42  
43  
44  
45  
46  
47  
48  
49  
50  
51  
52  
53  
54  
55  
56  
57  
58  
59  
60

**Article summary: strengths and limitations of this study**

- Inclusion of all people deceased from cancer in a Region with 4,4 million residents, linking information on use of anticancer drugs and palliative care services with tumour characteristics and severity, are major strengths of this study.
- Caution should be taken since administrative data could not capture all the elements that may contribute to clinical decision making
- Moreover, although multivariate analyses provide adjustment for factors associated with tumour severity, residual confounding may be present

**Keywords:**

- End of life care
- Anticancer drug therapy
- Palliative care
- Cancer



1  
2  
3 TEXT (word count: 2667 words, excluding tables, figures and references)  
4  
5  
6

## 7 **Introduction**

8  
9 The appropriate use of anticancer drugs in end-of-life care is increasingly debated, both for clinical and  
10 economic reasons. [1,2] Aggressive treatments, facilitated by the availability of newer anticancer agents that  
11 have fewer side effects, [3] often do not alleviate patients' condition or provide hope for extending  
12 significantly life of decent quality. Focus on clinically irrelevant treatments may lead to the underuse of  
13 palliative care, [4,5,6] defined by WHO as "an approach that improves the quality of life of patients and their  
14 families facing the problem associated with life-threatening illness, through ... assessment and treatment of  
15 pain and other problems, physical, psychosocial and spiritual". [7] Palliative care is generally provided in  
16 dedicated hospices or as home care services by a specially trained team of doctors, nurses and other  
17 specialists who work together with a patient's other doctors to provide an extra layer of support.  
18 [8,9] Expectations of patients' and parents on one side, [10] and difficulties in predicting and communicating  
19 patients' prognosis on the other, [11,12] are among the main determinants of overuse of anticancer drugs (box).  
20 Some patients may perceive continued active treatment as the only acceptable option. [10] For example, in a  
21 prospective cohort of terminally ill patients with cancer (n = 386), 31% preferred life-extending care rather than  
22 comfort care and as many as 77% preferred to receive drug treatment even if it would extend their life by only  
23 one week. [12] Communication between the care team, patient and family seem to be a central element that  
24 can influence this phenomenon. [13]  
25  
26 From the clinicians' point of view, withdrawal of drugs during the final, but not exactly predictable, stages of  
27 life is challenging [14]: early withdrawal can cause potential harm, whereas late withdrawal would involve  
28 unnecessary treatment and stress (box). Research findings suggest that culture may impact the utilization of  
29 aggressive treatment in patients with advanced cancer. For example, a study from Japan stated that only 3.7%  
30 of patients receive chemotherapy in their last 2 weeks of life [15]  
31  
32 However, anticancer therapy itself is frequently considered a form of palliative care, aimed at reducing  
33 tumour-related symptoms, so that boundaries between curative and palliative intent are sometimes difficult  
34 to establish (box). [16,17,18] According to the American Society of Clinical Oncology (ASCO), anticancer drugs

1  
2  
3 can potentially improve QOL in late stages of life even if they don't impact survival length [19]. In this regard,  
4  
5 their use promotes a simultaneous care approach, using palliative care alongside usual oncology care as the  
6  
7 standard of care for any patient with advanced cancer. [20]  
8

9  
10 Several studies have analysed use of anticancer drugs in the last weeks of life with results that, although  
11  
12 variable, show a tendency to prolong treatment beyond realistic expectations of a favourable benefit-risk  
13  
14 ratio.[16,21,22,23,24,25,26] Analysis of data available in administrative and clinical databases can inform  
15  
16 about prescribing patterns and the utilization of health care services in the end of life, in order to provide  
17  
18 useful basis for discussion helping clinicians and health care managers identify areas of improvement, enhance  
19  
20 the appropriateness and value of cancer care and make judicious use of available resources. In keeping with  
21  
22 these targets, this study aims at providing insights on the use of anticancer drugs, hospital, hospice and home  
23  
24 care services in the last month of life in a region of Northern Italy with more than 4 million residents, also to  
25  
26 assess whether palliative care services are inversely associated with overuse of antineoplastic therapy.  
27  
28  
29  
30  
31

## 32 **Methods**

33  
34 A cohort of residents in the Emilia-Romagna Region who had cancer as the underlying cause of death between  
35  
36 2017 and 2020 (ICD-X classification: *C00-C97, D00-D09, D37-D48*) were selected from the regional mortality  
37  
38 registry. This cohort was linked with the routinely available administrative databases, specifically: 1) hospital  
39  
40 discharge records (including inpatient use of anticancer drugs, type of tumour, patients' age, surgery and  
41  
42 hospital admissions); 2) ambulatory services (specifying use of anticancer drugs); 3) outpatient  
43  
44 pharmacological prescriptions (use of drugs within ATC classes L01 and L02); 4) hospice and 5) domiciliary care  
45  
46 databases (also collectively considered as palliative care services). These databases do not include any  
47  
48 personal details (e.g. name or fiscal code) that can allow direct identification of included subjects: anonymity is  
49  
50 warranted since each resident is associated to a unique identification number, allowing record linkage  
51  
52 procedures. A list of codes used to select hospital discharge information and ambulatory care is available in  
53  
54 the appendix.  
55  
56  
57  
58  
59  
60

Analyses were specifically aimed at describing frequency of anticancer drug use, palliative care services or both received within the last 30 days of life among eight Local Health Authorities (LHA). Logistic multivariate two-level analyses [27] were carried out to assess whether 1) anticancer drug use, 2) palliative care services 3) or both within the last 30 days of life could be associated with each other as well as with type of tumour (solid vs haematological, or aggressive tumours - see list in the appendix), patients' age, any surgery and hospital admissions within the last 6 months, considering LHA clustering as the second level (random intercept) to eliminate the effect of a possible correlation of results of residents in the same province. One-level models, [28] adding each LHA as covariates (each compared to a reference LHA) were subsequently used to assess whether use of anticancer drugs and of palliative care could present variability among LHA. Odds ratio with 95% confidence intervals were calculated. SAS version 8.2 (SAS Institute inc., Cary, NC, USA) and STATA/SE version 16.1 (STATACorp, College Station, TX 77845) were used for statistical analyses.

*Patient and Public Involvement:* no patient involved.

## Results

In Emilia-Romagna, 55,625 people died from cancer between January 1, 2017 and December 31, 2020. Table 1 quantifies the main cancer diagnosis associated with death. Extra table 1 also provides specific data on each LHA: no substantial differences are shown among them. Table 2 shows use of anticancer drugs and of palliative care services within the last 30 days of life by main cancer diagnosis in the whole cohort. The highest use of anticancer drugs was in people with breast, prostate and haematologic tumours (in more than 20% of patients), whereas the lowest use was in people with nervous system and urinary tumours (in less than 10% of patients). Use of palliative care services appears relatively uniform across tumour types, except for a lower observed use in genital tumours in men and in haematologic tumours. Overall, 15.3% of patients received anticancer drugs within the last 30 days of life, with an increasing trend from 2017 (14.6%) to 2020 (16.2%). About palliative care services, 40.2% of patients received them (from 39.7% in 2017 to 40.8% in 2020). 4.1% received surgery within the last 30 days.

1  
2  
3 Among the eight local health authorities, there was variability in the use of anticancer drugs (from 12.5% to  
4  
5 16.9% - Figure 1) and of palliative care (from 36.2% to 43.7% - Figure 2) in the last 30 days of life. 39.1% of  
6  
7 patients died in hospital, with wide variability among the LHAs (range: from 29.4% to 44.0%).  
8  
9

10 The likelihood to receive anticancer drugs during the last 30 days of life mostly increased in case of  
11  
12 haematologic compared to other tumours; it also increased in case of hospital admissions within the last 6  
13  
14 months. It was reduced in case of surgery within the last 6 months and (less) in case of aggressive compared to  
15  
16 other tumours, receiving home care or hospice services during the last 30 days and for every year of increasing  
17  
18 age. Detailed data are available in Table 3. The intracluster correlation coefficient (ICC) is 0.3%, showing low  
19  
20 intra-LHA correlation.  
21  
22  
23

24 The likelihood to receive palliative care during the last 30 days of life shows a limited increase in presence of  
25  
26 aggressive compared to other tumours. It was reduced in case of haematologic compared to other tumours,  
27  
28 hospital admissions within the last 6 months, surgery within the last 6 months and (less) in case of receiving  
29  
30 anticancer drugs during the last 30 days and for every year of increasing age (Table 3). Also in this case, the  
31  
32 intracluster correlation coefficient (0.3%) shows no intra LHA correlation.  
33  
34  
35

36 The likelihood to receive concurrent anticancer drugs and palliative care during the last 30 days of life was  
37  
38 reduced in case of surgery within the last 6 months and (less) in case of aggressive compared to other  
39  
40 tumours, in keeping with the result of the first model, suggesting that clinicians in such cases tend not to insist  
41  
42 on drug therapy (Table 3). Also in this case, the intracluster correlation coefficient (0.4%) shows no intra-LHA  
43  
44 correlation.  
45  
46  
47

48 Since no effect of clustering of subjects in the 8 LHAs was shown, we replicated the latter models without LHA  
49  
50 clustering and including LHA as covariates, in order to assess variability among LHAs (Extra table 2). Covariate  
51  
52 coefficients are the same as in the cluster models, confirming no effect of LHA clustering on the outcome. As  
53  
54 raw data suggested in Figure 1 and Figure 2, place of residence may also be associated with the likelihood to  
55  
56 receive end-of-life drug therapies and palliative care after adjusting for the other covariates.  
57  
58  
59  
60

## Discussion

This study shows that use of anticancer drugs and of palliative care services in the last month of life are inversely associated rather than complementary. A variable use of anticancer drugs and of palliative care services in different LHAs and across different tumours in the last month of life is also shown. Compared to solid cancers, haematologic tumours tend to be treated more frequently with anticancer drugs and to be provided less frequently with palliative care. This circumstance could be related to the more frequent availability of effective in-hospital therapies leading to longer survival [29], to perceiving a more favourable benefit-risk ratio of “not giving up”, and to the often rapid pace of decline near death. This has also been observed in other studies. [30,31,32,33] An opposite pattern is associated with aggressive tumours, treated more frequently with palliative care and less frequently with anticancer drugs.

Variability among different LHAs may depend either on a different epidemiological distribution of the tumours and of their severity, or on different prescribing attitudes and availability of palliative services in the areas of residence. Main cancer diagnosis associated with death appear similar across different LHA. In addition, multivariate analyses provide adjustment for factors associated with tumour severity (age, haematologic tumour, previous surgery and hospital admission) and, although residual confounding can be reasonably present, we consider unlikely that it could provide the main explanation for the observed variability.

Therefore, despite limits in our data and taking the possibility of unobserved factors (residual confounding) into account, we consider that this variability may be explained to a higher degree by different prescribing and management attitudes rather than by local epidemiology/case mix. As for the availability of palliative services in the areas of residence, the Emilia-Romagna Region has been quite active in implementing a national law issued in 2010 [34] to guarantee such availability as well as adequate access to these services. [35] Further qualitative research could analyse whether attitudes and level of endorsement in different LHA may in part explain differential use/access, aside from their availability which is relatively homogeneous across the region. Inclusion of all people deceased from cancer in a Region with 4,4 million residents, linking information on use of anticancer drugs and palliative care services with tumour characteristics and severity, are major strengths of this study. However, our results should be taken with caution since administrative data are grossly descriptive

1  
2  
3 and have obvious limits in capturing all the elements that may contribute to clinical decision making. As for  
4  
5 quality and completeness of available data, they are collected during the patient's care for the purpose of  
6  
7 reimbursements to healthcare rather than for research. No scientific validation of the unique patient  
8  
9 identification number is available.

10  
11  
12 Nonetheless, our findings are in line with conclusions of several other studies. There may be a potential to  
13  
14 reduce use of end-of-life anticancer therapies increasing at the same time the provision of palliative care  
15  
16 services. In general, shifting resources from aggressive pharmacological treatments to comprehensive  
17  
18 approaches to palliative care services should be a priority in cancer care, and palliative care may be one of the  
19  
20 determinants "protecting" against the overuse of anticancer drugs. While the high variability observed among  
21  
22 Local Health Authorities in the use of these services is worrying, it also suggests that a huge potential exists to  
23  
24 better organize end of life care for cancer patients.

25  
26  
27 Clinical and administrative data can help promote discussion among oncologists, specialists in palliative care,  
28  
29 nurses, general practitioners, pharmacists, health care managers and (ideally) patients' representatives to  
30  
31 maximize quality of end-of-life care, especially in blood malignancies, in light of available resources. Local  
32  
33 multidisciplinary groups can/should use data to analyse possible determinants of inappropriate care and  
34  
35 propose strategies to offer patients and their families the best possible support. This especially in light of the  
36  
37 increasing availability and accelerated approval of new therapies [36] that often have a limited added value  
38  
39 but a wide range of indications, targeting resistant cases and/or administered by oral route. These  
40  
41 circumstances may favour an increase in the use of anticancer drugs, sometimes (or often) without a real  
42  
43 clinical benefit, and may hinder or delay access to palliative care services.

44  
45  
46  
47  
48 Data on pharmaco-utilization can also help local multidisciplinary groups to discuss to what extent anticancer  
49  
50 drugs are used with a palliative intent, and to foster the design of research protocols aimed at evaluating the  
51  
52 impact of drug utilization on patients' quality of life (QoL). Record linkage studies generally cannot provide  
53  
54 such specific information, since QoL information is generally unavailable in administrative databases, and this  
55  
56 is also one of the limits of our study. A few RCTs and systematic reviews addressing different types of tumours  
57  
58 have shown some effect of different anticancer therapies on reducing pain and improving patients' quality of  
59  
60

1  
2  
3 life [37,38,39,40,41,42]. However, this issue is largely debated as evidence is controversial or lacking, so that  
4  
5 the guideline from the European Society for Medical Oncology (ESMO) explicitly contraindicates the use of  
6  
7 anticancer drugs in the last weeks of life. [43]  
8

9  
10 In any case, the availability of adequate prognostic tools is key to improve the appropriateness of end-of-life  
11  
12 care. In theory, ECOG performance status can be used as such to guide clinicians and palliative care specialists  
13  
14 to make choices for appropriate health care, [44] although it is subjectively assessed and may lead to  
15  
16 optimistic assessments. [45] A palliative prognostic score integrating subjective judgments with a series of  
17  
18 more objective parameters has been validated and extensively discussed, showing a good balance between  
19  
20 accuracy and applicability in clinical practice. [46,47,48,49] Physicians should be also prepared to address  
21  
22 patients' and relatives' concerns and expectations by refining their communication skills. Interventions that  
23  
24 include communication about advanced care planning (ACP) and care preferences with goals-of-care (GOC)  
25  
26 conversations, [50] have been found to improve concordance between care preferences and actual care  
27  
28 delivered. [51] Nurses play a pivotal role too in accompanying patients and their families through their cancer  
29  
30 journey, being in an ideal position [52, 53] to provide cancer patients and their families with emotional and  
31  
32 social support, together with adequate communication about the diagnosis, prognosis and treatment  
33  
34 alternatives [52,54].  
35  
36  
37  
38  
39  
40

## 41 **Conclusion**

42  
43  
44 By showing, through administrative data, that use of anticancer drugs and of palliative care services in the last  
45  
46 month of life may be inversely associated rather than complementary, this study suggests the need to further  
47  
48 explore the hypothesis that palliative care services may have a role in preventing inappropriate use of  
49  
50 anticancer drugs. Administrative data may help highlight macro issues that should be addressed with a  
51  
52 multidisciplinary approach involving clinicians, nurses, specialists in palliative care, pharmacists, health care  
53  
54 managers and members of the public, eventually helping the promotion of palliative care and limiting the use  
55  
56 of aggressive treatments that may not be beneficial.  
57  
58  
59  
60

1  
2  
3 *Box. Main determinants of potential overuse of anticancer drugs*  
4

- 5 • Expectations of patients' and parents (and "never give up" attitude)
  - 6 • difficulties in predicting patients' prognosis
  - 7 • difficulties in communicating patients' prognosis
  - 8 • physician's perception of potential harm by early withdrawal
  - 9 • therapy seen as a form of palliative care
- 10  
11  
12  
13  
14  
15  
16  
17  
18  
19  
20  
21  
22  
23  
24  
25  
26  
27  
28  
29  
30  
31  
32  
33  
34  
35  
36  
37  
38  
39  
40  
41  
42  
43  
44  
45  
46  
47  
48  
49  
50  
51  
52  
53  
54  
55  
56  
57  
58  
59  
60



Table 1 – Study population of patients dying for cancer in Emilia-Romagna between 2017 and 2020, by tumour site: number (white background) and percentage (grey background)

|                  |        |
|------------------|--------|
|                  | 1,439  |
| Head & neck      | 2.6    |
|                  | 17,575 |
| Digestive        | 31.6   |
|                  | 10,098 |
| Respiratory      | 18.2   |
|                  | 409    |
| Musculoskeletal  | 0.7    |
|                  | 1,472  |
| Skin             | 2.7    |
|                  | 1,892  |
| Nervous system   | 3.4    |
|                  | 3,583  |
| Breast           | 6.4    |
|                  | 2,548  |
| Genital (women)  | 4.6    |
|                  | 215    |
| Genital (men)    | 0.4    |
|                  | 4,043  |
| Urinary          | 7.3    |
|                  | 2,253  |
| Prostate         | 4.1    |
|                  | 5,874  |
| Haematologic     | 10.6   |
|                  | 4,224  |
| Other/metastatic | 7.6    |
|                  | 55,625 |
| Region           | 100.0  |

Table 2 - Percentage of use of anticancer drugs and palliative care (home or hospice care) during the last 30 days of life, by cancer type

| <i>Cancer type</i> | <b>Treatment during the last 30 day of life</b> |                    |                       |                             |
|--------------------|-------------------------------------------------|--------------------|-----------------------|-----------------------------|
|                    | <b>% anticancer drugs</b>                       | <b>% home care</b> | <b>% hospice care</b> | <b>% overall palliative</b> |
| Head & neck        | 13.0                                            | 19.3               | 28.7                  | 41.3                        |
| Digestive          | 10.3                                            | 23.1               | 27.7                  | 44.8                        |
| Respiratory        | 19.3                                            | 21.5               | 28.0                  | 43.3                        |
| Musculoskeletal    | 10.4                                            | 20.5               | 21.8                  | 38.1                        |
| Skin               | 16.5                                            | 25.1               | 30.9                  | 47.8                        |
| Nervous system     | 6.1                                             | 20.3               | 31.9                  | 45.2                        |
| Breast             | 27.1                                            | 20.8               | 25.5                  | 40.4                        |
| Genital (women)    | 16.4                                            | 20.8               | 29.6                  | 44.6                        |
| Genital (men)      | 13.0                                            | 15.8               | 11.2                  | 24.2                        |
| Urinary            | 8.7                                             | 19.2               | 22.9                  | 37.4                        |
| Prostate           | 26.1                                            | 18.4               | 23.2                  | 37.1                        |
| Haematologic       | 24.7                                            | 15.3               | 13.2                  | 26.2                        |
| Other/metastatic   | 8.4                                             | 18.2               | 15.8                  | 30.8                        |
| <b>Region</b>      | <b>15.3</b>                                     | <b>20.7</b>        | <b>24.9</b>           | <b>40.2</b>                 |

Table 3 – Odds ratios of receiving anticancer drugs, palliative care or both given each covariate (two-level multivariate model considering LHA clustering)

| Factor                                               | Anticancer drugs  | Palliative care   | Anticancer drugs +<br>palliative care |
|------------------------------------------------------|-------------------|-------------------|---------------------------------------|
|                                                      | OR (CI 95%)       | OR (CI 95%)       | OR (CI 95%)                           |
| Anticancer drugs within the last 30 days             | -                 | 0.90* (0.85-0.94) | -                                     |
| Palliative care within the last 30 days              | 0.92* (0.87-0.97) | -                 | -                                     |
| Haematologic tumour ( <i>ref. solid/metastatic</i> ) | 2.15* (2.00-2.30) | 0.52* (0.49-0.56) | 1.03 (0.92-1.16)                      |
| Age (continuous, in year)                            | 0.95* (0.95-0.95) | 0.99* (0.99-0.99) | 0.96*(0.96-0.96)                      |
| Hospital admission within the last 6 months          | 1.63* (1.55-1.72) | 0.70* (0.67-0.72) | 1.05 (0.98-1.14)                      |
| Surgery within the last 6 months                     | 0.59* (0.52-0.67) | 0.44* (0.39-0.49) | 0.42*(0.33-0.54)                      |
| Aggressive tumour                                    | 0.88* (0.84-0.93) | 1.12* (1.08-1.16) | 0.84*(0.78-0.90)                      |

\*significance at  $p \leq 0.05$

## Figure legends

Figure 1 - Percentage of use of anticancer drugs during the last 30 days of life, by LHA of residence (all tumours)

Figure 2 - Percentage of home care services use during the last 30 days of life, by LHA of residence (all tumours)

## Author contributions

GF: conception and design, interpretation of data, drafting the article

MM: conception and design, analysis and interpretation of data

MG: interpretation of data, revising the article critically for important intellectual content

RG: conception and design, interpretation of data, revising the article critically for important intellectual content

**Acknowledgements:** the authors want to thank Dr Alberto Bagnulo for his comments on a preliminary version

All authors approved the version to be published and agree to be accountable for all aspects of the work in ensuring that questions related to the accuracy or integrity of any part of the work are appropriately investigated and resolved

**Competing interests:** all authors declare that they do not have competing interests

**Funding statement:** this research received no specific grant from any funding agency in the public, commercial or not-for-profit sectors.

**Data sharing statement:** data will be made available upon request

**Ethics statement:** this study involves human participants and was approved by an Ethics Committee.

Name of the Ethics Committee: Comitato Etico dell'Area Vasta Emilia Nord, Reggio Emilia (Italy)

1  
2  
3 Reference number for ethics approval : 1032/2020/OSS/AUSLREreceived from the Ethics Committee of “Area  
4  
5 Vasta Emilia Nord”  
6  
7  
8  
9  
10  
11  
12  
13  
14  
15  
16  
17  
18  
19  
20  
21  
22  
23  
24  
25  
26  
27  
28  
29  
30  
31  
32  
33  
34  
35  
36  
37  
38  
39  
40  
41  
42  
43  
44  
45  
46  
47  
48  
49  
50  
51  
52  
53  
54  
55  
56  
57  
58  
59  
60

## REFERENCES

- 1  
2  
3  
4  
5  
6  
7<sup>1</sup> Specchia ML, La Torre G, Calabrò GE, Villari P, Grilli R, Federici A, et al. Disinvestment in cancer care: a survey  
8 investigating European countries' opinions and views. *Eur J Public Health* 2018;28:987-992
- 9<sup>2</sup> Blanke CD, Fromme EK. Chemotherapy Near the End of Life: First--and Third and Fourth (Line)--Do No Harm.  
10 *JAMA Oncol* 2015;1:785-6
- 11<sup>3</sup> Chan WL, Lam KO, Siu WK, Yuen KK. Chemotherapy at end-of-life: an integration of oncology and palliative  
12 team. *Support Care Cancer*. 2016;24:1421-1427
- 13<sup>4</sup> Wu CC, Hsu TW, Chang CM, et al. Palliative Chemotherapy Affects Aggressiveness of End-of-Life Care The  
14 *Oncologist* 2016;21:771-
- 15<sup>5</sup> Huynh L, Moore J. Palliative and end-of-life care for the older adult with cancer. *Curr Opin Support Palliat Care*  
16 2021;15:23-28
- 17  
18<sup>6</sup> El-Jawahri A, Nelson AM, Gray TF, Lee SJ, LeBlanc TW. Palliative and End-of-Life Care for Patients With  
19 Hematologic Malignancies. *J Clin Oncol* 2020;38:944-953
- 20<sup>7</sup> Palliative Care. World Health Organization. Available at <https://www.who.int/cancer/palliative/definition/en/>  
21 (last accessed: Jan 19, 2022)
- 22<sup>8</sup> Ferrell BR, Temel JS, Temin S, et al. Integration of Palliative Care Into Standard Oncology Care: American  
23 Society of Clinical Oncology Clinical Practice Guideline Update. *Journal of Clinical Oncology* 2017;35:96-112
- 24<sup>9</sup> Page JP, Lederman L, Kelly J, Barry MM, and James AT Teams and Teamwork in Cancer Care Delivery: Shared  
25 Mental Models to Improve Planning for Discharge and Coordination of Follow-Up Care *Journal of Oncology*  
26 *Practice* 2016 12:11, 1053-1058
- 27  
28<sup>10</sup> Brom, L, Onwuteaka-Philipsen, BD, Widdershoven, GA. Mechanisms that contribute to the tendency to  
29 continue chemotherapy in patients with advanced cancer. Qualitative observations in the clinical setting.  
30 *Support Care Cancer* 2016; 24:1317-1325
- 31<sup>11</sup> Hui D. Prognostication of Survival in Patients With Advanced Cancer: Predicting the Unpredictable? *Cancer*  
32 *Control*. 2015; 22:489-97
- 33  
34<sup>12</sup> Thorne SE, Bultz BD, Baile WF, et al. Is there a cost to poor communication in cancer care?: a critical review of  
35 the literature. *Psycho-Oncology* 2005;14: 875-884
- 36<sup>13</sup> Skov Benthien K, Adersen M, Petersen MA, Soelberg Vadstrup E, Sjøgren P, Groenvold M. Is specialized  
37 palliative cancer care associated with use of antineoplastic treatment at the end of life? A population-based  
38 cohort study. *Palliative Medicine*. 2018;32:1509-1517
- 39<sup>14</sup> Clarke, G, Johnston, S, Corrie, P. Withdrawal of anticancer therapy in advanced disease: a systematic literature  
40 review. *BMC Cancer* 2015;15: 892
- 41<sup>15</sup> Sano M, Fushimi K. Association of Palliative Care Consultation With Reducing Inpatient Chemotherapy Use in  
42 Elderly Patients With Cancer in Japan: Analysis Using a Nationwide Administrative Database. *American Journal*  
43 *of Hospice and Palliative Medicine* 2017;34:685-691
- 44  
45<sup>16</sup> Harrington SE, Smith TJ. The role of chemotherapy at the end of life: "when is enough, enough?". *JAMA*.  
46 2008;299:2667-78.
- 47<sup>17</sup> Wright AA, Zhang B, Keating NL, Weeks JC, Prigerson HG. Associations between palliative chemotherapy and  
48 adult cancer patients' end of life care and place of death: prospective cohort study. *BMJ* 348: g1219
- 49<sup>18</sup> Neugut AI, Prigerson HG. Curative, Life-Extending, and Palliative Chemotherapy: New Outcomes Need New  
50 Names. *Oncologist*. 2017;22:883-5
- 51<sup>19</sup> Pacetti P, Paganini G, Orlandi M, Mambrini A, Pennucci MC, Del Freo A, et al. Chemotherapy in the last 30 days  
52 of life of advanced cancer patients. *Support Care Cancer*. 2015;23:3277-3280
- 53  
54<sup>20</sup> Smith CB, Phillips T, Smith TJ. Using the New ASCO Clinical Practice Guideline for Palliative Care Concurrent  
55 With Oncology Care Using the TEAM Approach. DOI: 10.1200/EDBK\_175474 *American Society of Clinical*  
56 *Oncology Educational Book* 37 (October 29, 2018) 714-723.
- 57<sup>21</sup> Nappa U, Lindqvist O, Rasmussen BH, Axelsson B. Palliative chemotherapy during the last month of life. *Ann*  
58 *Oncol* 2011; 11: 2375-2380
- 59  
60

- 1  
2  
3
- 
- 4 22 Cardona-Morrell M, Kim JCH, Turner RM, Anstey M, Mitchell IA, Hillman K. Non-beneficial treatments in  
5 hospital at the end of life: a systematic review on extent of the problem. *International Journal for Quality in*  
6 *Health Care* 2016;28:456–469
- 7 23 Rochigneux P, Raoul JL, Beaussant Y, Aubry R, Goldwasser F, Tournigand C, Morin L. Use of chemotherapy near  
8 the end of life: what factors matter. *Annals of Oncology* 2017;28:809–817
- 9 24 Prigerson HG, Bao Y, Shah MA, Paulk ME, LeBlanc TW, et al. Chemotherapy Use, Performance Status, and  
10 Quality of Life at the End of Life. *JAMA Oncol* 2015;1:778-784
- 11 25 Massa I et al. Chemotherapy and palliative care near end-of life: examining the appropriateness at a cancer  
12 institute for colorectal cancer patients. *BMC Palliative Care* (2018) 17:86
- 13 26 Pellizzari M, Rolfini M, Ferroni E, Savioli V, Gennaro N, Schievano E, et al. Intensity of integrated cancer  
14 palliative care plans and end-of-life acute medical hospitalisation among cancer patient in Northern Italy. *Eur J*  
15 *Cancer Care* 2018;27:e12742
- 16 27 Goldstein H. (2003). *Multilevel Statistical Models*. 3rd ed. London, UK: Arnold
- 17 28 Hosmer, D. W. and Lemeshow, S. (2000). *Applied Logistic Regression*. New York, NY: John Wiley & Sons, Inc.,  
18 DOI: <https://doi.org/10.1002/0471722146>
- 19 29 Pulte D, Jansen L, Brenner H. Changes in long term survival after diagnosis with common hematologic  
20 malignancies in the early 21st century. *Blood Cancer Journal* 2020;10: Article number 56
- 21 30 Van Metre Baum L, Roseblum R, Scarborough B, Smith CB. Evaluating end-of-life chemotherapy for solid  
22 tumor and hematologic malignancy patients. *Progress in palliative care* 2021.  
23 <https://doi.org/10.1080/09699260.2021.1872138> <https://doi.org/10.1080/09699260.2021.1872138>
- 24 31 Hui D, Didwaniya N, Vidal M, et al. Quality of End-of-Life Care in Patients with Hematologic Malignancies: A  
25 Retrospective Cohort Study. *Cancer* 2014;120:1572–1578.
- 26 32 Odejide OO, Salas Coronado DY, Watts CD, et al. End-of-Life Care for Blood Cancers: A Series of Focus Groups  
27 With Hematologic Oncologists. *J Oncol Pract* 2014;10:e396–e403
- 28 33 Rodriguez MA, DeJesus AY, Cheng L. Use of Chemotherapy Within the Last 14 Days of Life in Patients Treated  
29 at a Comprehensive Cancer Center. *JAMA Intern Med* 2014;174:989-991
- 30 34 Legge 15 marzo 2010 , n. 38. G.U. Serie Generale , n. 65 del 19 marzo 2010
- 31 35 Regione Emilia-Romagna, Assessorato politiche per la salute. Indagine sullo stato di attuazione degli hospice  
32 nella rete di cure palliative dell'Emilia-Romagna anno 2013. [http://salute.regione.emilia-](http://salute.regione.emilia-romagna.it/siseps/sanita/sdhs/files/AO_1_3_All_PG_91336_2015.pdf/view)  
33 [romagna.it/siseps/sanita/sdhs/files/AO\\_1\\_3\\_All\\_PG\\_91336\\_2015.pdf/view](http://salute.regione.emilia-romagna.it/siseps/sanita/sdhs/files/AO_1_3_All_PG_91336_2015.pdf/view) (last accessed: Sept 15, 2021)
- 34 36 Gyawali B, Phillips Hey S, Kesselheim AS. Assessment of the Clinical Benefit of Cancer Drugs Receiving  
35 Accelerated Approval. *JAMA Intern Med.* 2019;179:906-913
- 36 37 Simmonds PC. Palliative chemotherapy for advanced colorectal cancer: systematic review and meta-analysis.  
37 *Colorectal Cancer Collaborative Group. BMJ* 2000;321:531-5
- 38 38 Bezjak A, Tu D, Seymour L, Clark G, Trajkovic A, Zukin M, et al. Symptom improvement in lung cancer patients  
39 treated with erlotinib: quality of life analysis of the National Cancer Institute of Canada Clinical Trials Group  
40 Study BR.21. *J Clin Oncol* 2006;24:3831-7
- 41 39 Oostendorp LJ, Stalmeier PF, Donders AR, van der Graaf WT, Ottevanger PB. Efficacy and safety of palliative  
42 chemotherapy for patients with advanced breast cancer pretreated with anthracyclines and taxanes: a  
43 systematic review. *Lancet Oncol* 2011;12:1053-61.
- 44 40 Gourgou-Bourgade S, Bascoul-Mollevi C, Desseigne F, Ychou M, Bouché O, Guimbaud R, et al. Impact of  
45 FOLFIRINOX compared with gemcitabine on quality of life in patients with metastatic pancreatic cancer: results  
46 from the PRODIGE 4/ACCORD 11 randomized trial. *J Clin Oncol* 2013;31:23-9
- 47 41 Janmaat VT, Steyerberg EW, van der Gaast A, Mathijssen RHJ, Bruno MJ, Peppelenbosch MP, et al. Palliative  
48 chemotherapy and targeted therapies for esophageal and gastroesophageal junction cancer. *Cochrane Database of*  
49 *Systematic Reviews* 2017, Issue 11. Art. No.: CD004063. DOI: 10.1002/14651858.CD004063.pub4
- 50  
51  
52  
53  
54  
55  
56  
57  
58  
59  
60

1  
2  
3  
4  
5  
6  
7  
8  
9  
10  
11  
12  
13  
14  
15  
16  
17  
18  
19  
20  
21  
22  
23  
24  
25  
26  
27  
28  
29  
30  
31  
32  
33  
34  
35  
36  
37  
38  
39  
40  
41  
42  
43  
44  
45  
46  
47  
48  
49  
50  
51  
52  
53  
54  
55  
56  
57  
58  
59  
60

- 
- 42 van Kleef JJ, Ter Veer E, van den Boorn HG, Schokker S, Ngai LL, Prins MJ, et al. Quality of Life During Palliative Systemic Therapy for Esophagogastric Cancer: Systematic Review and Meta-Analysis. *J Natl Cancer Inst* 2020;112:12-29
- 43 Crawford GB, Dzierżanowski T, Hauser K, Larkin P, Luque-Blanco AI, Murphy I, et al. Care of the adult cancer patient at the end of life: ESMO Clinical Practice Guidelines. *ESMO Open* 2021;6:100225
- 44 Jang RW, Caraiscos VB, Swami N, Banerjee S, Mak E, Kaya E, et al. Simple Prognostic Model for Patients With Advanced Cancer Based on Performance Status. *Journal of Oncology Practice* 2014;10:e335-e341
- 45 Johansen J, Boisen MK, Mellempgaard A, Holm B. Prognostic value of ECOG performance status in lung cancer assessed by patients and physicians. *Journal of Clinical Oncology* 2013 31:15\_suppl, 8103-8103
- 46 Maltoni M, Nanni O, Pirovano M, Scarpi E, Indelli M, Martini C, et al. Successful Validation of the Palliative Prognostic Score in Terminally Ill Cancer Patient. *Journal of Pain and Symptom Management* 1999;17:240-7
- 47 Tarumi Y, Watanabe SM, Lau F, Yang J, Quan H, Sawchuk L, et al. Evaluation of the Palliative Prognostic Score (PaP) and Routinely Collected Clinical Data in Prognostication of Survival for Patients Referred to a Palliative Care Consultation Service in an Acute Care Hospital. *J Pain Symptom Manage* 2011;42:419e431
- 48 Glare PA, Eychmueller S, McMahon P. Diagnostic Accuracy of the Palliative Prognostic Score in Hospitalized Patients With Advanced Cancer. *Journal of Clinical Oncology* 2004;22:4823-8
- 49 Hui D, Park M, Liu D, Paiva CE, Suh SY, Morita T, Bruera E. Clinician prediction of survival versus the Palliative Prognostic Score: Which approach is more accurate? *European Journal of Cancer* 2016;64:89-95
- 50 IOM IoM. *Dying in America: Improving Quality and Honoring Individual Preferences Near the End of Life* Washington, DC: IOM; 2015. March 19 2015
- 51 Starr, Lauren T et al. "Associations Among End-of-Life Discussions, Health-Care Utilization, and Costs in Persons With Advanced Cancer: A Systematic Review." *The American journal of hospice & palliative care* vol. 36,10 (2019): 913-926.
- 52 Banerjee, S. C., Manna, R., Coyle, N., Shen, M. J., Pehrson, C., Zaider, T., Hammonds, S., Krueger, C. A., Parker, P. A., & Bylund, C. L. (2016). Oncology nurses' communication challenges with patients and families: A qualitative study. *Nurse education in practice*, 16(1), 193-201.
- 53 Baer L, Weinstein E. Improving oncology nurses' communication skills for difficult conversations. *Clin J Oncol Nurs*. 2013;17:E45-E51
- 54 Hack TF, Ruether JD, Pickles T, et al. Behind closed doors II: systematic analysis of prostate cancer patients' primary treatment consultations with radiation oncologists and predictors of satisfaction with communication. *Psycho-Oncology*. 2012;21:809-817





Figure 1 - Percentage of anticancer drug use during the last 30 days of life, by LHA of residence (all tumours)

86x57mm (300 x 300 DPI)

1  
2  
3  
4  
5  
6  
7  
8  
9  
10  
11  
12  
13  
14  
15  
16  
17  
18  
19  
20  
21  
22  
23  
24  
25  
26  
27  
28  
29  
30  
31  
32  
33  
34  
35  
36  
37  
38  
39  
40  
41  
42  
43  
44  
45  
46  
47  
48  
49  
50  
51  
52  
53  
54  
55  
56  
57  
58  
59  
60



Figure 2 - Percentage of home care services use during the last 30 days of life, by LHA of residence (all tumours)

85x58mm (300 x 300 DPI)

Extra table 1 – Study population of patients dying for cancer in Emilia-Romagna between 2017 and 2020, by tumour site and local health authority (LHA): number (white background) and percentage (grey background)

|                  | LHA1  | LHA2  | LHA3  | LHA4  | LHA5   | LHA6  | LHA7  | LHA8   | Region |
|------------------|-------|-------|-------|-------|--------|-------|-------|--------|--------|
| Head & neck      | 105   | 137   | 157   | 221   | 296    | 43    | 164   | 316    | 1,439  |
|                  | 2.6   | 2.5   | 2.7   | 2.7   | 2.6    | 2.7   | 3.1   | 2.3    | 2.6    |
| Digestive        | 1,422 | 1,803 | 1,825 | 2,571 | 3,507  | 504   | 1,638 | 4,305  | 17,575 |
|                  | 35.3  | 33.2  | 31.4  | 31.9  | 30.4   | 31.5  | 30.6  | 31.2   | 31.6   |
| Respiratory      | 778   | 857   | 1,084 | 1,501 | 1,993  | 279   | 957   | 2,649  | 10,098 |
|                  | 19.3  | 15.8  | 18.7  | 18.6  | 17.3   | 17.5  | 17.9  | 19.2   | 18.2   |
| Musculoskeletal  | 31    | 51    | 52    | 62    | 63     | 18    | 30    | 102    | 409    |
|                  | 0.8   | 0.9   | 0.9   | 0.8   | 0.6    | 1.1   | 0.6   | 0.7    | 0.7    |
| Skin             | 122   | 129   | 193   | 171   | 319    | 68    | 110   | 360    | 1,472  |
|                  | 3.0   | 2.4   | 3.3   | 2.1   | 2.8    | 4.3   | 2.1   | 2.6    | 2.7    |
| Nervous system   | 109   | 181   | 187   | 302   | 387    | 57    | 163   | 506    | 1,892  |
|                  | 2.7   | 3.3   | 3.2   | 3.7   | 3.4    | 3.6   | 3.0   | 3.7    | 3.4    |
| Breast           | 278   | 355   | 370   | 517   | 789    | 102   | 382   | 790    | 3,583  |
|                  | 6.9   | 6.5   | 6.4   | 6.4   | 6.8    | 6.4   | 7.1   | 5.7    | 6.4    |
| Genital (women)  | 196   | 243   | 262   | 385   | 598    | 74    | 204   | 586    | 2,548  |
|                  | 4.9   | 4.5   | 4.5   | 4.8   | 5.2    | 4.6   | 3.8   | 4.2    | 4.6    |
| Genital (men)    | 9     | 21    | 14    | 32    | 50     | 6     | 29    | 54     | 215    |
|                  | 0.2   | 0.4   | 0.2   | 0.4   | 0.4    | 0.4   | 0.5   | 0.4    | 0.4    |
| Urinary          | 247   | 397   | 389   | 566   | 918    | 103   | 461   | 962    | 4,043  |
|                  | 6.1   | 7.3   | 6.7   | 7.0   | 8.0    | 6.5   | 8.6   | 7.0    | 7.3    |
| Prostate         | 181   | 237   | 275   | 323   | 486    | 56    | 204   | 491    | 2,253  |
|                  | 4.5   | 4.4   | 4.7   | 4.0   | 4.2    | 3.5   | 3.8   | 3.6    | 4.1    |
| Haematologic     | 359   | 607   | 563   | 870   | 1,241  | 188   | 546   | 1500   | 5,874  |
|                  | 8.9   | 11.2  | 9.7   | 10.8  | 10.8   | 11.8  | 10.2  | 10.9   | 10.6   |
| Other/metastatic | 191   | 406   | 440   | 547   | 883    | 100   | 469   | 1,188  | 4,224  |
|                  | 4.7   | 7.5   | 7.6   | 6.8   | 7.7    | 6.3   | 8.8   | 8.6    | 7.6    |
| Region           | 4,028 | 5,424 | 5,811 | 8,068 | 11,530 | 1,598 | 5,357 | 13,809 | 55,625 |
|                  | 100.0 | 100.0 | 100.0 | 100.0 | 100.0  | 100.0 | 100.0 | 100.0  | 100.0  |

Extra table 2 - Odds ratios of receiving anticancer drugs, palliative care or both given each covariate (logistic multivariate model without LHA clustering)

| Factor                                                       | Anticancer drugs | Palliative care  | Anticancer drugs + palliative care |
|--------------------------------------------------------------|------------------|------------------|------------------------------------|
|                                                              | OR (CI 95%)      | OR (CI 95%)      | OR (CI 95%)                        |
| Anticancer drugs within the last 30 days ( <i>ref.NO</i> )   | -                | 0.90*(0.85-0.94) | -                                  |
| Palliative care within the last 30 days ( <i>ref.NO</i> )    | 0.92*(0.87-0.97) | -                | -                                  |
| Haematologic tumour ( <i>ref. solid/metastatic</i> )         | 2.15*(2.01-2.30) | 0.52*(0.49-0.56) | 1.03 (0.92-1.17)                   |
| Age (continuous, in year)                                    | 0.95*(0.95-0.95) | 0.99*(0.99-0.99) | 0.96*(0.96-0.96)                   |
| Hospital admission within the last 30 days ( <i>ref.NO</i> ) | 1.63*(1.55-1.72) | 0.70*(0.67-0.72) | 1.05 (0.98-1.14)                   |
| Surgery within the last 30 days ( <i>ref.NO</i> )            | 0.59*(0.52-0.68) | 0.44*(0.39-0.49) | 0.42*(0.33-0.54)                   |
| Aggressive tumour ( <i>ref.NO</i> )                          | 0.88*(0.84-0.92) | 1.12*(1.08-1.16) | 0.84*(0.78-0.90)                   |
| LHA 3 ( <i>reference</i> )                                   |                  |                  |                                    |
| LHA 1                                                        | 1.09 (0.97-1.22) | 0.86*(0.79-0.93) | 1.03 (0.87-1.21)                   |
| LHA 2                                                        | 0.79*(0.71-0.89) | 0.77*(0.72-0.84) | 0.69*(0.58-0.81)                   |
| LHA 3                                                        | 1.04 (0.94-1.14) | 0.80*(0.74-0.85) | 0.91 (0.79-1.05)                   |
| LHA 4                                                        | 0.91*(0.84-1.00) | 0.92*(0.86-0.98) | 0.84*(0.73-0.96)                   |
| LHA 5                                                        | 0.75*(0.63-0.89) | 1.07 (0.96-1.20) | 0.76*(0.59-0.98)                   |
| LHA 6                                                        | 0.92 (0.83-1.02) | 0.96 (0.89-1.04) | 0.89 (0.76-1.04)                   |
| LHA 7                                                        | 0.99 (0.90-1.07) | 1.04 (0.97-1.10) | 1.03 (0.91-1.17)                   |

\* significance at  $p \leq 0.05$ ; LHA = local health authority

## APPENDIX. Relevant codes for cohort selection and use of health services

### Cohort selection:

from mortality registry, deceased subjects with cancer as underlying cause of death (ICD X: C00-C97; D00-D09; D37-D48)

### Anticancer drugs from hospital records and ambulatory care:

- Hospital records: ICD 9-CM pathology code V58.1x and/or\*/ICD9 CM intervention code =99.25 and/or DRG code 410
- ambulatory care: administrative codes (from tariff nomenclator) 99.25, 992501, 8901F0

### Anticancer drugs for outpatients:

ATC code L01 or L02

### ICD-9 codes for aggressive tumours

150.x malignant tumor of the esophagus  
151.x malignant tumor of the stomach  
155.x malignant tumor of the liver and intrahepatic bile ducts  
156.x malignant tumor of the gallbladder and extrahepatic ducts  
157.x malignant tumor of the pancreas  
162.x Malignant tumor of the trachea, bronchi and lungs  
163.x malignant tumor of the pleura  
179.x malignant tumor of the uterus  
191.x malignant brain tumor  
192.0 malignant tumor of the cranial nerves  
192.1 malignant tumor of the brain meninges  
202.4 leukemic reticuloendotheliosis  
204.x lymphoid leukemia  
205.x acute myeloid leukemia  
206.x monocytic leukemia  
207.x other specific leukemias  
208.x unspecified cell-type leukemia

### ICD-9 codes for metastases

196.xx-199.xx

### ICD-X codes for haematologic tumors

C81 Hodgkin's disease  
C82 Follicular (nodular) non-Hodgkin's lymphoma  
C83 Diffuse non-Hodgkin's lymphoma  
C84 Peripheral and cutaneous T-cell lymphoma

1  
2  
3  
4  
5  
6  
7  
8  
9  
10  
11  
12  
13  
14  
15  
16  
17  
18  
19  
20  
21  
22  
23  
24  
25  
26  
27  
28  
29  
30  
31  
32  
33  
34  
35  
36  
37  
38  
39  
40  
41  
42  
43  
44  
45  
46  
47  
48  
49  
50  
51  
52  
53  
54  
55  
56  
57  
58  
59  
60

- C85 Other and unspecified types of non-Hodgkin's lymphoma
- C88 Immunoproliferative malignant diseases
- C90 Multiple myeloma and malignant plasma cell tumors
- C91 Lymphoid leukemia
- C92 Myeloid leukemia
- C93 Monocytic leukemia
- C94 Other specified cell type leukemias
- C95 Unspecified cell type leukemia
- C96 Other and unspecified malignant tumor of lymphoid, hematopoietic and related tissues
- D45 Polycythemia vera
- D46 Myelodysplastic syndromes
- D47 Other tumors of uncertain or unknown behavior of lymphatic, hematopoietic and tissues

For peer review only

STROBE Statement—Checklist of items that should be included in reports of *cohort studies*

|                              | Item No | Recommendation                                                                                                                                                                                                                                                                                                                                                                                                                                                                                            |
|------------------------------|---------|-----------------------------------------------------------------------------------------------------------------------------------------------------------------------------------------------------------------------------------------------------------------------------------------------------------------------------------------------------------------------------------------------------------------------------------------------------------------------------------------------------------|
| <b>Title and abstract</b>    | 1       | (a) Indicate the study's design with a commonly used term in the title or the abstract<br><b>(Pag. 1-2)</b><br>(b) Provide in the abstract an informative and balanced summary of what was done and what was found<br><b>(Pag. 2-3)</b>                                                                                                                                                                                                                                                                   |
| <b>Introduction</b>          |         |                                                                                                                                                                                                                                                                                                                                                                                                                                                                                                           |
| Background/rationale         | 2       | Explain the scientific background and rationale for the investigation being reported<br><b>(Pag. 5-6)</b>                                                                                                                                                                                                                                                                                                                                                                                                 |
| Objectives                   | 3       | State specific objectives, including any prespecified hypotheses<br><b>(pag. 6)</b>                                                                                                                                                                                                                                                                                                                                                                                                                       |
| <b>Methods</b>               |         |                                                                                                                                                                                                                                                                                                                                                                                                                                                                                                           |
| Study design                 | 4       | Present key elements of study design early in the paper<br><b>(pag. 6)</b>                                                                                                                                                                                                                                                                                                                                                                                                                                |
| Setting                      | 5       | Describe the setting, locations, and relevant dates, including periods of recruitment, exposure, follow-up, and data collection<br><b>(pag. 6)</b>                                                                                                                                                                                                                                                                                                                                                        |
| Participants                 | 6       | (a) Give the eligibility criteria, and the sources and methods of selection of participants. Describe methods of follow-up<br><b>(pag. 6)</b><br>(b) For matched studies, give matching criteria and number of exposed and unexposed                                                                                                                                                                                                                                                                      |
| Variables                    | 7       | Clearly define all outcomes, exposures, predictors, potential confounders, and effect modifiers. Give diagnostic criteria, if applicable<br><b>(pag. 7, appendix)</b>                                                                                                                                                                                                                                                                                                                                     |
| Data sources/<br>measurement | 8*      | For each variable of interest, give sources of data and details of methods of assessment (measurement). Describe comparability of assessment methods if there is more than one group<br><b>(pag. 6-7, appendix)</b>                                                                                                                                                                                                                                                                                       |
| Bias                         | 9       | Describe any efforts to address potential sources of bias<br><b>(pag. 7, appendix for multivariate statistical models)</b>                                                                                                                                                                                                                                                                                                                                                                                |
| Study size                   | 10      | Explain how the study size was arrived at<br><b>We considered all deceased subjects in a four-year period (pag. 6). No formal hypothesis was pre-specified</b>                                                                                                                                                                                                                                                                                                                                            |
| Quantitative variables       | 11      | Explain how quantitative variables were handled in the analyses. If applicable, describe which groupings were chosen and why<br><b>(pag. 6-7, appendix)</b>                                                                                                                                                                                                                                                                                                                                               |
| Statistical methods          | 12      | (a) Describe all statistical methods, including those used to control for confounding<br><b>(pag. 7)</b><br>(b) Describe any methods used to examine subgroups and interactions<br><b>(pag. 7)</b><br>(c) Explain how missing data were addressed<br><b>(we commented on completeness of data at pag. 10)</b><br>(d) If applicable, explain how loss to follow-up was addressed<br><b>(not applicable)</b><br>(e) Describe any sensitivity analyses<br><b>(pag. 7 – LHA clustering vs not clustering)</b> |

|                          |     |                                                                                                                                                                                                                                                                                                                                                                                                                                                                                                                                                                                     |
|--------------------------|-----|-------------------------------------------------------------------------------------------------------------------------------------------------------------------------------------------------------------------------------------------------------------------------------------------------------------------------------------------------------------------------------------------------------------------------------------------------------------------------------------------------------------------------------------------------------------------------------------|
| <b>Results</b>           |     |                                                                                                                                                                                                                                                                                                                                                                                                                                                                                                                                                                                     |
| Participants             | 13* | (a) Report numbers of individuals at each stage of study—eg numbers potentially eligible, examined for eligibility, confirmed eligible, included in the study, completing follow-up, and analysed<br><b>Pag. 7 and table 1 (included all deceased subjects – cancer as underlying cause of death)</b><br>(b) Give reasons for non-participation at each stage<br><b>(not applicable)</b><br>(c) Consider use of a flow diagram<br><b>(not applicable)</b>                                                                                                                           |
| Descriptive data         | 14* | (a) Give characteristics of study participants (eg demographic, clinical, social) and information on exposures and potential confounders<br><b>(pag. 7-8 – see covariates of the statistical models, table 3 and extra tables)</b><br>(b) Indicate number of participants with missing data for each variable of interest<br><b>(55,625 subjects were included - pag. 7)</b><br>(c) Summarise follow-up time (eg, average and total amount)<br><b>(exposures were assessed in the last 30 days of life)</b>                                                                         |
| Outcome data             | 15* | Report numbers of outcome events or summary measures over time<br><b>(% use of anticancer drugs and palliative care during the last 30 days of life has been reported by cancer type – see tab. 2)</b>                                                                                                                                                                                                                                                                                                                                                                              |
| Main results             | 16  | (a) Give unadjusted estimates and, if applicable, confounder-adjusted estimates and their precision (eg, 95% confidence intervals). Make clear which confounders were adjusted for and why they were included<br><b>We provided results from multivariate analyses (OR and confidence intervals - see tab 3 and extra table 2)</b><br>(b) Report category boundaries when continuous variables were categorized<br><b>Not applicable</b><br>(c) If relevant, consider translating estimates of relative risk into absolute risk for a meaningful time period<br><b>Not relevant</b> |
| Other analyses           | 17  | Report other analyses done—eg analyses of subgroups and interactions, and sensitivity analyses<br><b>See extra tables</b>                                                                                                                                                                                                                                                                                                                                                                                                                                                           |
| <b>Discussion</b>        |     |                                                                                                                                                                                                                                                                                                                                                                                                                                                                                                                                                                                     |
| Key results              | 18  | Summarise key results with reference to study objectives<br><b>(pag. 9)</b>                                                                                                                                                                                                                                                                                                                                                                                                                                                                                                         |
| Limitations              | 19  | Discuss limitations of the study, taking into account sources of potential bias or imprecision. Discuss both direction and magnitude of any potential bias<br><b>(pag. 9-10)</b>                                                                                                                                                                                                                                                                                                                                                                                                    |
| Interpretation           | 20  | Give a cautious overall interpretation of results considering objectives, limitations, multiplicity of analyses, results from similar studies, and other relevant evidence<br><b>(pag. 9-11)</b>                                                                                                                                                                                                                                                                                                                                                                                    |
| Generalisability         | 21  | Discuss the generalisability (external validity) of the study results<br><b>(pag. 9-10)</b>                                                                                                                                                                                                                                                                                                                                                                                                                                                                                         |
| <b>Other information</b> |     |                                                                                                                                                                                                                                                                                                                                                                                                                                                                                                                                                                                     |
| Funding                  | 22  | Give the source of funding and the role of the funders for the present study and, if applicable, for the original study on which the present article is based<br><b>(not applicable – authors work within the Italian NHS and this research was</b>                                                                                                                                                                                                                                                                                                                                 |



---

**within the scope of their job)**

---

\*Give information separately for exposed and unexposed groups.

**Note:** An Explanation and Elaboration article discusses each checklist item and gives methodological background and published examples of transparent reporting. The STROBE checklist is best used in conjunction with this article (freely available on the Web sites of PLoS Medicine at <http://www.plosmedicine.org/>, Annals of Internal Medicine at <http://www.annals.org/>, and Epidemiology at <http://www.epidem.com/>). Information on the STROBE Initiative is available at <http://www.strobe-statement.org>.

For peer review only
