# Supplementary material for: End-of-life care in cancer patients: how much drug therapy and how much palliative care? Record linkage study in Northern Italy
Source: PubMed Central journal article supplement — BMJ Open. 2022 May 6;12(5):e057437. doi: 10.1136/bmjopen-2021-057437 (PMC9083387; doi:10.1136/bmjopen-2021-057437), 2022-05-06
Supplement: bmjopen-2021-057437supp001.pdf [file bmjopen-2021-057437supp001.pdf]

**APPENDIX. Relevant codes for cohort selection and use of health services****Cohort selection:**

from mortality registry, deceased subjects with cancer as underlying cause of death (ICD X: C00-C97; D00-D09; D37-D48)

**Anticancer drugs from hospital records and ambulatory care:**

- Hospital records: ICD 9-CM pathology code V58.1x and/or\*/ICD9 CM intervention code =99.25 and/or DRG code 410
- ambulatory care: administrative codes (from tariff nomenclator) 99.25, 992501, 8901F0

**Anticancer drugs for outpatients:**

ATC code L01 or L02

**ICD-9 codes for aggressive tumours**

150.x malignant tumor of the esophagus  
151.x malignant tumor of the stomach  
155.x malignant tumor of the liver and intrahepatic bile ducts  
156.x malignant tumor of the gallbladder and extrahepatic ducts  
157.x malignant tumor of the pancreas  
162.x Malignant tumor of the trachea, bronchi and lungs  
163.x malignant tumor of the pleura  
179.x malignant tumor of the uterus  
191.x malignant brain tumor  
192.0 malignant tumor of the cranial nerves  
192.1 malignant tumor of the brain meninges  
202.4 leukemic reticuloendotheliosis  
204.x lymphoid leukemia  
205.x acute myeloid leukemia  
206.x monocytic leukemia  
207.x other specific leukemias  
208.x unspecified cell-type leukemia

**ICD-9 codes for metastases**

196.xx-199.xx

**ICD-X codes for haematologic tumors**

C81 Hodgkin's disease  
C82 Follicular (nodular) non-Hodgkin's lymphoma  
C83 Diffuse non-Hodgkin's lymphoma  
C84 Peripheral and cutaneous T-cell lymphoma

C85 Other and unspecified types of non-Hodgkin's lymphoma  
C88 Immunoproliferative malignant diseases  
C90 Multiple myeloma and malignant plasma cell tumors  
C91 Lymphoid leukemia  
C92 Myeloid leukemia  
C93 Monocytic leukemia  
C94 Other specified cell type leukemias  
C95 Unspecified cell type leukemia  
C96 Other and unspecified malignant tumor of lymphoid, hematopoietic and related tissues  
D45 Polycythemia vera  
D46 Myelodysplastic syndromes  
D47 Other tumors of uncertain or unknown behavior of lymphatic, hematopoietic and tissues
