# Supplementary material for: End-of-life care in cancer patients: how much drug therapy and how much palliative care? Record linkage study in Northern Italy
Source: PubMed Central journal article supplement — BMJ Open. 2022 May 6;12(5):e057437. doi: 10.1136/bmjopen-2021-057437 (PMC9083387; doi:10.1136/bmjopen-2021-057437), 2022-05-06
Supplement: bmjopen-2021-057437supp002.pdf [file bmjopen-2021-057437supp002.pdf]

Extra table 1 – Study population of patients dying for cancer in Emilia-Romagna between 2017 and 2020, by tumour site and local health authority (LHA): number (white background) and percentage (grey background)

|                  | LHA1  | LHA2  | LHA3  | LHA4  | LHA5   | LHA6  | LHA7  | LHA8   | Region |
|------------------|-------|-------|-------|-------|--------|-------|-------|--------|--------|
| Head & neck      | 105   | 137   | 157   | 221   | 296    | 43    | 164   | 316    | 1,439  |
|                  | 2.6   | 2.5   | 2.7   | 2.7   | 2.6    | 2.7   | 3.1   | 2.3    | 2.6    |
| Digestive        | 1,422 | 1,803 | 1,825 | 2,571 | 3,507  | 504   | 1,638 | 4,305  | 17,575 |
|                  | 35.3  | 33.2  | 31.4  | 31.9  | 30.4   | 31.5  | 30.6  | 31.2   | 31.6   |
| Respiratory      | 778   | 857   | 1,084 | 1,501 | 1,993  | 279   | 957   | 2,649  | 10,098 |
|                  | 19.3  | 15.8  | 18.7  | 18.6  | 17.3   | 17.5  | 17.9  | 19.2   | 18.2   |
| Musculoskeletal  | 31    | 51    | 52    | 62    | 63     | 18    | 30    | 102    | 409    |
|                  | 0.8   | 0.9   | 0.9   | 0.8   | 0.6    | 1.1   | 0.6   | 0.7    | 0.7    |
| Skin             | 122   | 129   | 193   | 171   | 319    | 68    | 110   | 360    | 1,472  |
|                  | 3.0   | 2.4   | 3.3   | 2.1   | 2.8    | 4.3   | 2.1   | 2.6    | 2.7    |
| Nervous system   | 109   | 181   | 187   | 302   | 387    | 57    | 163   | 506    | 1,892  |
|                  | 2.7   | 3.3   | 3.2   | 3.7   | 3.4    | 3.6   | 3.0   | 3.7    | 3.4    |
| Breast           | 278   | 355   | 370   | 517   | 789    | 102   | 382   | 790    | 3,583  |
|                  | 6.9   | 6.5   | 6.4   | 6.4   | 6.8    | 6.4   | 7.1   | 5.7    | 6.4    |
| Genital (women)  | 196   | 243   | 262   | 385   | 598    | 74    | 204   | 586    | 2,548  |
|                  | 4.9   | 4.5   | 4.5   | 4.8   | 5.2    | 4.6   | 3.8   | 4.2    | 4.6    |
| Genital (men)    | 9     | 21    | 14    | 32    | 50     | 6     | 29    | 54     | 215    |
|                  | 0.2   | 0.4   | 0.2   | 0.4   | 0.4    | 0.4   | 0.5   | 0.4    | 0.4    |
| Urinary          | 247   | 397   | 389   | 566   | 918    | 103   | 461   | 962    | 4,043  |
|                  | 6.1   | 7.3   | 6.7   | 7.0   | 8.0    | 6.5   | 8.6   | 7.0    | 7.3    |
| Prostate         | 181   | 237   | 275   | 323   | 486    | 56    | 204   | 491    | 2,253  |
|                  | 4.5   | 4.4   | 4.7   | 4.0   | 4.2    | 3.5   | 3.8   | 3.6    | 4.1    |
| Haematologic     | 359   | 607   | 563   | 870   | 1,241  | 188   | 546   | 1,500  | 5,874  |
|                  | 8.9   | 11.2  | 9.7   | 10.8  | 10.8   | 11.8  | 10.2  | 10.9   | 10.6   |
| Other/metastatic | 191   | 406   | 440   | 547   | 883    | 100   | 469   | 1,188  | 4,224  |
|                  | 4.7   | 7.5   | 7.6   | 6.8   | 7.7    | 6.3   | 8.8   | 8.6    | 7.6    |
| Region           | 4,028 | 5,424 | 5,811 | 8,068 | 11,530 | 1,598 | 5,357 | 13,809 | 55,625 |
|                  | 100.0 | 100.0 | 100.0 | 100.0 | 100.0  | 100.0 | 100.0 | 100.0  | 100.0  |
