# Supplementary material for: End-of-life care in cancer patients: how much drug therapy and how much palliative care? Record linkage study in Northern Italy
Source: PubMed Central journal article supplement — BMJ Open. 2022 May 6;12(5):e057437. doi: 10.1136/bmjopen-2021-057437 (PMC9083387; doi:10.1136/bmjopen-2021-057437), 2022-05-06
Supplement: bmjopen-2021-057437supp003.pdf [file bmjopen-2021-057437supp003.pdf]

Extra table 2 - Odds ratios of receiving anticancer drugs, palliative care or both given each covariate (logistic multivariate model without LHA clustering)

| Factor                                                       | Anticancer drugs | Palliative care  | Anticancer drugs + palliative care |
|--------------------------------------------------------------|------------------|------------------|------------------------------------|
|                                                              | OR (CI 95%)      | OR (CI 95%)      | OR (CI 95%)                        |
| Anticancer drugs within the last 30 days ( <i>ref.NO</i> )   | -                | 0.90*(0.85-0.94) | -                                  |
| Palliative care within the last 30 days ( <i>ref.NO</i> )    | 0.92*(0.87-0.97) | -                | -                                  |
| Haematologic tumour ( <i>ref. solid/metastatic</i> )         | 2.15*(2.01-2.30) | 0.52*(0.49-0.56) | 1.03 (0.92-1.17)                   |
| Age (continuous, in year)                                    | 0.95*(0.95-0.95) | 0.99*(0.99-0.99) | 0.96*(0.96-0.96)                   |
| Hospital admission within the last 30 days ( <i>ref.NO</i> ) | 1.63*(1.55-1.72) | 0.70*(0.67-0.72) | 1.05 (0.98-1.14)                   |
| Surgery within the last 30 days ( <i>ref.NO</i> )            | 0.59*(0.52-0.68) | 0.44*(0.39-0.49) | 0.42*(0.33-0.54)                   |
| Aggressive tumour ( <i>ref.NO</i> )                          | 0.88*(0.84-0.92) | 1.12*(1.08-1.16) | 0.84*(0.78-0.90)                   |
| LHA 3 ( <i>reference</i> )                                   |                  |                  |                                    |
| LHA 1                                                        | 1.09 (0.97-1.22) | 0.86*(0.79-0.93) | 1.03 (0.87-1.21)                   |
| LHA 2                                                        | 0.79*(0.71-0.89) | 0.77*(0.72-0.84) | 0.69*(0.58-0.81)                   |
| LHA 3                                                        | 1.04 (0.94-1.14) | 0.80*(0.74-0.85) | 0.91 (0.79-1.05)                   |
| LHA 4                                                        | 0.91*(0.84-1.00) | 0.92*(0.86-0.98) | 0.84*(0.73-0.96)                   |
| LHA 5                                                        | 0.75*(0.63-0.89) | 1.07 (0.96-1.20) | 0.76*(0.59-0.98)                   |
| LHA 6                                                        | 0.92 (0.83-1.02) | 0.96 (0.89-1.04) | 0.89 (0.76-1.04)                   |
| LHA 7                                                        | 0.99 (0.90-1.07) | 1.04 (0.97-1.10) | 1.03 (0.91-1.17)                   |

\* significance at  $p \leq 0.05$ ; LHA = local health authority
